# Supplementary material
Source: publisher figshare collection journal article supplement (https://acs.figshare.com/ndownloader/files/3744568)
Supplement: Supplementary file 1 [file 3744568]

81
13_Intermediate_A
C         -1.71330       -2.42700       -1.03670
H         -2.47910       -1.72690       -1.35670
C         -0.70860       -2.70620       -1.95080
H         -0.76640       -2.21850       -2.92070
C          1.02220       -2.98210        0.42820
H          2.05650       -2.69270        0.58320
C          0.08390       -2.47360        1.30460
H          0.44450       -1.84410        2.11540
C          0.79570       -4.19410       -0.46670
H          1.75020       -4.71830       -0.58000
H          0.12830       -4.89220        0.04720
C          0.24780       -3.87850       -1.88020
H         -0.25570       -4.76880       -2.28550
H          1.08440       -3.66830       -2.55360
C         -2.07390       -3.31450        0.15030
H         -3.14890       -3.21430        0.33110
H         -1.91460       -4.35910       -0.13380
C         -1.32590       -2.99940        1.47030
H         -1.30390       -3.90060        2.10080
H         -1.89130       -2.25420        2.03410
P          1.73040        0.47910        0.13030
C          2.72120        1.33220       -1.15080
C          2.96640       -0.19410        1.29550
C          3.67420        2.28070       -0.73270
C          2.54630        1.09050       -2.52040
C          2.75570       -0.12630        2.68160
C          4.10390       -0.85170        0.79920
C          4.43580        2.97090       -1.67330
H          3.82050        2.47700        0.32530
C          3.31730        1.78050       -3.45960
H          1.80790        0.36880       -2.85090
C          3.67850       -0.70210        3.55740
H          1.88610        0.38990        3.07410
C          5.01920       -1.42990        1.67990
H          4.28490       -0.90340       -0.27080
S         -1.71280        0.31800        0.79750
C          4.25940        2.71980       -3.03820
H          5.16830        3.70150       -1.34280
H          3.17680        1.58440       -4.51850
C          4.80780       -1.35580        3.05930
H          3.51420       -0.63670        4.62910
H          5.89920       -1.93130        1.28800
H          4.85640        3.25710       -3.76960
H          5.52300       -1.80340        3.74330
Ir         0.11700       -0.99510       -0.58540
H          1.28690       -1.47130       -1.55080
C          0.06630        2.54890        0.60780
H         -0.00870        2.49140       -0.48420
C         -1.24570        2.09910        1.25740
H         -1.06040        2.01700        2.33380
C         -2.38510        3.10180        1.01940
H         -3.28410        2.77200        1.54820
H         -2.63850        3.14000       -0.04560
C          0.44020        3.97380        1.03550
H          1.35140        4.26340        0.50080
H          0.68820        3.94870        2.10470
C         -0.69630        4.97350        0.78950
H         -0.39600        5.96350        1.15080
H         -0.87970        5.07340       -0.28940
C         -1.97930        4.50950        1.48840
H         -2.80380        5.20210        1.28430
H         -1.82720        4.50740        2.57640
O          1.14430        1.69580        1.07050
H         -0.17410        0.03400       -1.76730
C         -3.39630        0.40760        0.12130
C         -4.43510        0.05580        1.02160
C         -3.68090        0.77970       -1.21390
C         -5.75210        0.04450        0.54460
C         -5.01890        0.75220       -1.63520
C         -6.04530        0.37910       -0.77420
H         -6.55460       -0.22280        1.22620
H         -5.24890        1.03900       -2.65760
H         -7.07330        0.36580       -1.12490
C         -4.20250       -0.28120        2.47890
H         -3.63210       -1.20730        2.60350
H         -3.64910        0.50660        3.00050
H         -5.16110       -0.41160        2.98870
C         -2.64370        1.21100       -2.22400
H         -1.84940        1.81660       -1.78400
H         -2.15810        0.34880       -2.69460
H         -3.11720        1.79650       -3.01740
81
13_Intermediate_B
C         -1.61180       -2.21730       -1.85500
H         -2.12310       -1.43540       -2.41030
C         -0.41680       -2.66590       -2.39540
H         -0.09250       -2.21680       -3.33070
C          0.41210       -3.04390        0.41850
H          1.36800       -2.87990        0.90490
C         -0.68090       -2.38230        0.94190
H         -0.51350       -1.77610        1.82880
C          0.32760       -4.25720       -0.49780
H          1.19220       -4.89770       -0.29660
H         -0.55340       -4.84430       -0.22140
C          0.30220       -3.94320       -2.01440
H         -0.16040       -4.78220       -2.55480
H          1.32930       -3.87150       -2.38530
C         -2.44870       -2.99710       -0.84780
H         -3.50250       -2.75800       -1.02280
H         -2.34590       -4.06540       -1.06170
C         -2.12820       -2.71310        0.64100
H         -2.43040       -3.57950        1.24840
H         -2.74390       -1.87950        0.98380
P          1.64860        0.33140        0.28500
C          3.17080        0.79950       -0.62300
C          2.26090       -0.26630        1.90040
C          4.13450        1.57370        0.05110
C          3.38320        0.45590       -1.96530
C          1.77790        0.25730        3.10890
C          3.21750       -1.29600        1.92600
C          5.28820        1.99010       -0.60960
H          3.98390        1.84710        1.09120
C          4.54460        0.87100       -2.62230
H          2.64150       -0.12940       -2.49630
C          2.24430       -0.24790        4.32520
H          1.05950        1.06880        3.10020
C          3.67660       -1.79750        3.14380
H          3.61980       -1.69620        0.99890
S         -1.77340        0.79840       -0.58440
C          5.49590        1.63650       -1.94710
H          6.02660        2.58610       -0.08140
H          4.70080        0.59690       -3.66150
C          3.18830       -1.27600        4.34530
H          1.87090        0.16850        5.25630
H          4.41990       -2.58930        3.15350
H          6.39790        1.95900       -2.45950
H          3.54850       -1.66600        5.29290
Ir         0.15080       -1.00800       -0.84310
H          1.48110       -1.69170       -1.36440
C          0.36190        2.63340       -0.20650
H          0.69150        2.36630       -1.21790
C         -1.16070        2.50220       -0.09630
H         -1.43230        2.63650        0.95350
C         -1.87770        3.54990       -0.96710
H         -2.95980        3.45070       -0.83010
H         -1.66690        3.34260       -2.02440
C          0.81340        4.06310        0.11770
H          1.90000        4.11540       -0.01030
H          0.60360        4.25220        1.17880
C          0.10090        5.10840       -0.75080
H          0.42870        6.11160       -0.45560
H          0.39320        4.97800       -1.80210
C         -1.42130        4.97650       -0.62130
H         -1.92860        5.68780       -1.28320
H         -1.72780        5.22360        0.40450
O          1.00850        1.76860        0.76350
H          0.36920       -0.03630       -2.10200
C         -3.28320        0.66730        0.41560
C         -4.50550        0.60950       -0.30120
C         -3.25890        0.62960        1.82800
C         -5.69560        0.51550        0.43030
C         -4.48120        0.53820        2.50980
C         -5.68880        0.48090        1.82320
H         -6.63910        0.47290       -0.10670
H         -4.47190        0.50740        3.59620
H         -6.62430        0.40730        2.37050
C         -1.99570        0.69410        2.65380
H         -1.10720        0.44970        2.07310
H         -1.85010        1.69790        3.07410
H         -2.05840        0.00280        3.50040
C         -4.59080        0.65180       -1.81220
H         -4.10870        1.54340       -2.22540
H         -4.10870       -0.21480       -2.27780
H         -5.63780        0.65470       -2.12750
81
14_Intermediate_C
C         -0.38440       -1.86960       -2.16310
H         -0.34410       -0.91780       -2.68440
C          0.80740       -2.43450       -1.76150
H          1.72550       -1.91080       -2.01250
C         -0.70750       -3.38130        0.59720
H         -0.45200       -3.48270        1.64760
C         -1.81940       -2.60680        0.29250
H         -2.37170       -2.18350        1.12810
C         -0.09680       -4.41040       -0.34680
H          0.34520       -5.20810        0.25820
H         -0.90440       -4.87760       -0.91930
C          0.99420       -3.86830       -1.30520
H          1.05840       -4.52150       -2.18770
H          1.96710       -3.93270       -0.80800
C         -1.69160       -2.63910       -2.29070
H         -2.27120       -2.19850       -3.10850
H         -1.46590       -3.66290       -2.60500
C         -2.57390       -2.65600       -1.01950
H         -3.21040       -3.55350       -1.02560
H         -3.26300       -1.80980       -1.04060
P          1.72350        0.40270        0.22860
C          2.80740        0.71630       -1.22230
C          2.88010        0.14750        1.62440
C          4.14910        1.09910       -1.04560
C          2.28490        0.65980       -2.52560
C          3.63240       -1.03680        1.68720
C          3.03120        1.11500        2.62740
C          4.94630        1.40570       -2.14860
H          4.57370        1.15700       -0.04940
C          3.08310        0.97350       -3.62690
H          1.25190        0.37380       -2.68840
C          4.52270       -1.24840        2.73880
H          3.53070       -1.79580        0.91640
C          3.91810        0.89250        3.68480
H          2.46060        2.03500        2.58230
S         -1.70110        0.66700       -0.39200
C          4.41640        1.34280       -3.43980
H          5.98240        1.69400       -1.99750
H          2.66300        0.92500       -4.62710
C          4.66370       -0.28530        3.74280
H          5.10280       -2.16580        2.77580
H          4.02430        1.64490        4.46100
C         -3.32510        0.55760        0.41360
H          5.04050        1.58040       -4.29640
H          5.35250       -0.45450        4.56550
C         -4.45000        0.57850       -0.45170
C         -3.47660        0.46100        1.81590
C         -5.72490        0.48110        0.11870
C         -4.77980        0.37980        2.33060
C         -5.89300        0.38100        1.49770
H         -6.59380        0.49320       -0.53310
H         -4.91040        0.31310        3.40740
H         -6.89080        0.31270        1.92140
C         -4.34550        0.71680       -1.95670
H         -3.88460        1.66670       -2.24620
H         -3.74280       -0.07660       -2.41060
H         -5.34190        0.67730       -2.40520
C         -2.33820        0.41910        2.81120
H         -1.43740        0.92740        2.46940
H         -2.65260        0.87380        3.75560
H         -2.04900       -0.61630        3.02910
Ir         0.05070       -1.20630        0.14320
H         -0.07500       -0.84130        1.69060
H          1.23860       -2.11720        0.67330
C          0.29750        2.66780       -0.23520
H          0.50610        2.41860       -1.28320
C         -1.18210        2.41030        0.08210
H         -1.32320        2.51040        1.16120
C         -2.08910        3.40590       -0.66490
H         -3.13210        3.21890       -0.39190
H         -1.99900        3.23280       -1.74530
C          0.67240        4.13380        0.02520
H          1.72000        4.26960       -0.26460
H          0.61260        4.30560        1.10800
C         -0.24200        5.12230       -0.70770
H          0.04560        6.14660       -0.44460
H         -0.10400        5.02480       -1.79350
C         -1.70940        4.86060       -0.35150
H         -2.37050        5.53270       -0.91070
H         -1.87490        5.06590        0.71500
O          1.15700        1.89440        0.63320
81
14_Intermediate_D
C          0.66260       -2.12420        1.65370
H          0.86930       -1.20670        2.19590
C         -0.65170       -2.54590        1.58970
H         -1.40440       -1.95600        2.10440
C          0.04320       -3.56290       -1.09560
H         -0.51580       -3.58370       -2.02620
C          1.27090       -2.91970       -1.11390
H          1.59410       -2.50970       -2.06810
C         -0.39060       -4.55340       -0.02480
H         -1.05650       -5.28830       -0.48770
H          0.48950       -5.10930        0.31210
C         -1.12450       -3.92750        1.18560
H         -1.03990       -4.60020        2.05170
H         -2.19260       -3.85790        0.95710
C          1.86410       -3.02540        1.40070
H          2.69150       -2.67550        2.02570
H          1.62760       -4.03420        1.75230
C          2.35340       -3.07020       -0.06660
H          2.89380       -4.01140       -0.24710
H          3.08570       -2.27420       -0.21730
P         -1.65390        0.52940       -0.05650
C         -1.99990        1.27290        1.58840
C         -3.32370        0.28180       -0.76300
C         -2.84710        2.39750        1.62820
C         -1.46200        0.78400        2.78610
C         -4.30310       -0.37270       -0.00020
C         -3.61580        0.67890       -2.07510
C         -3.14420        3.01310        2.84200
H         -3.27450        2.78800        0.70960
C         -1.76760        1.39860        4.00360
H         -0.79930       -0.07170        2.78260
C         -5.56200       -0.62500       -0.54600
H         -4.09170       -0.67790        1.02110
C         -4.87990        0.42820       -2.61370
H         -2.86560        1.19050       -2.66810
S          1.75220        0.28320       -0.95310
C         -2.60730        2.51190        4.03270
H         -3.79770        3.88020        2.86020
H         -1.34620        1.00620        4.92420
C         -5.85240       -0.22480       -1.85330
H         -6.31670       -1.12760        0.05200
H         -5.10270        0.74550       -3.62840
H         -2.84400        2.99020        4.97870
H         -6.83390       -0.41940       -2.27600
Ir        -0.29360       -1.31770       -0.41940
H         -0.56350       -0.91930       -1.95220
H         -1.68850       -2.04240       -0.59460
C          0.00910        2.59410       -0.72080
H          0.21450        2.62170        0.35360
C          1.20550        2.00740       -1.48740
H          0.87020        1.81570       -2.51290
C          2.40940        2.96520       -1.51260
H          3.20230        2.53330       -2.13120
H          2.81940        3.07260       -0.50170
C         -0.33210        4.00700       -1.21840
H         -1.14570        4.39630       -0.59670
H         -0.72420        3.91590       -2.24000
C          0.87670        4.94840       -1.21140
H          0.57930        5.92660       -1.60580
H          1.21780        5.11430       -0.17990
C          2.01840        4.35380       -2.04160
H          2.89940        5.00530       -2.01380
H          1.71070        4.27890       -3.09360
O         -1.19150        1.82180       -0.96130
C          3.26020        0.46820        0.04370
C          4.46400        0.07330       -0.59850
C          3.26260        0.91550        1.38340
C          5.65200        0.11130        0.14170
C          4.48050        0.93010        2.07890
C          5.66470        0.52910        1.47040
H          6.57850       -0.19120       -0.33800
H          4.48840        1.26840        3.11150
H          6.59710        0.54590        2.02730
C          2.03920        1.43240        2.09660
H          1.94590        2.51900        1.97130
H          1.12040        0.98160        1.72290
H          2.10510        1.24100        3.17200
C          4.53470       -0.37900       -2.04200
H          5.57280       -0.58400       -2.31780
H          3.95490       -1.29060       -2.22110
H          4.14680        0.38040       -2.72880
117
15_Intermediate_A
C          2.98490       -1.64860       -1.88700
H          3.69580       -1.75330       -1.07390
C          1.98620       -2.60830       -1.96670
H          1.99340       -3.39730       -1.21890
C          0.32920       -0.40400       -3.02100
H         -0.71730       -0.17320       -2.85100
C          1.25150        0.58040       -2.71510
H          0.86800        1.53570       -2.36520
C          0.61420       -1.60590       -3.91290
H         -0.30750       -1.86050       -4.44560
H          1.33580       -1.31330       -4.68110
C          1.10860       -2.87300       -3.17200
H          1.65940       -3.51770       -3.87270
H          0.24520       -3.45470       -2.83540
C          3.43050       -0.76900       -3.04940
H          4.50150       -0.57570       -2.93610
H          3.32280       -1.33500       -3.97930
C          2.69880        0.59010       -3.16130
H          2.75720        0.95510       -4.19730
H          3.22990        1.32930       -2.55710
S          2.68250        0.93600        0.35170
Ir         1.08610       -0.80720       -0.78040
H         -0.06500       -1.87740       -1.03060
C          0.79620        1.76860        2.22930
C          2.08590        0.94360        2.12170
C          3.12310        1.56740        3.08730
H          3.63690        2.39700        2.59000
H          3.88370        0.81580        3.31260
C          0.12630        1.52770        3.59560
H         -0.52310        0.65070        3.51670
H         -0.51770        2.38690        3.81080
C          1.17070        1.32530        4.71840
H          0.75610        1.66180        5.67420
H          1.39030        0.25660        4.83530
C          2.46910        2.07790        4.40060
H          3.18630        1.97450        5.22140
H          2.25140        3.14980        4.31410
O         -0.17620        1.58810        1.16270
H          1.28940       -1.66580        0.55160
H          1.88650       -0.09560        2.39080
H          1.06230        2.82250        2.11480
P         -0.58270        0.31520        0.27670
O         -1.59020        0.98270       -0.81510
O         -1.56100       -0.47330        1.32750
C         -2.81090        1.57970       -0.41430
C         -2.52580       -1.36720        0.81980
C         -3.76980        0.72060        0.14730
C         -3.02890        2.94860       -0.64550
C         -3.58100       -0.76900        0.09860
C         -2.44330       -2.74590        1.05930
C         -4.93970        1.27840        0.70990
C         -4.22780        3.44420       -0.11230
C         -2.10710        3.84970       -1.50180
C         -4.48360       -1.58650       -0.60910
C         -3.38800       -3.51640        0.35570
C         -1.50820       -3.49350        2.04370
C         -5.15060        2.66460        0.58890
C         -5.95430        0.44040        1.45430
H         -4.46010        4.49490       -0.23320
C         -0.71550        4.04370       -0.85820
C         -1.95350        3.22280       -2.91010
C         -2.71160        5.25730       -1.69790
C         -4.35820       -2.98760       -0.49150
C         -5.56190       -1.01610       -1.50160
H         -3.35870       -4.59550        0.46890
C         -2.39530       -4.31680        3.01640
C         -0.58760       -4.45950        1.26050
C         -0.62390       -2.59030        2.92650
C         -6.37930        3.31910        1.17810
H         -6.90590        0.37890        0.91020
H         -5.60230       -0.57720        1.62840
H         -6.17980        0.88990        2.42840
H         -0.16220        3.10870       -0.77440
H         -0.12370        4.73650       -1.46870
H         -0.80440        4.47160        0.14700
H         -1.50330        2.22840       -2.86940
H         -2.92800        3.13520       -3.40440
H         -1.31530        3.85960       -3.53470
H         -3.69480        5.22180       -2.17940
H         -2.80850        5.80210       -0.75220
H         -2.04770        5.84040       -2.34530
C         -5.28790       -3.91660       -1.23800
H         -5.52330       -1.48120       -2.49370
H         -6.56450       -1.21540       -1.10170
H         -5.46190        0.06200       -1.63190
H         -1.75740       -4.85160        3.72990
H         -3.06430       -3.66080        3.58490
H         -3.01010       -5.06070        2.50170
H          0.07470       -3.90470        0.58780
H          0.03550       -5.03200        1.95860
H         -1.16050       -5.17520        0.66140
H          0.12320       -2.04830        2.34490
H         -1.21780       -1.86500        3.49130
H         -0.09300       -3.22390        3.64680
H         -6.41040        4.38460        0.93270
H         -6.40100        3.22860        2.27200
H         -7.30430        2.86100        0.80640
H         -5.18090       -3.80990       -2.32520
H         -6.34020       -3.71290       -1.00410
H         -5.08400       -4.96080       -0.98420
C          4.45770        0.57120        0.44370
C          5.30760        1.57060       -0.09540
C          4.98030       -0.62750        0.98500
C          6.68450        1.31500       -0.13170
C          6.36720       -0.82590        0.92310
C          7.21290        0.12560        0.36210
H          7.34650        2.07030       -0.54550
H          6.78040       -1.74430        1.33070
H          8.28350       -0.05360        0.32150
C          4.14780       -1.68100        1.67780
H          3.94630       -1.39910        2.71920
H          3.18260       -1.84470        1.19430
H          4.68510       -2.63320        1.70390
C          4.81520        2.91240       -0.59670
H          4.16700        2.82620       -1.47470
H          4.23980        3.44380        0.16850
H          5.66620        3.53930       -0.87610
117
15_Intermediate_B
C          2.50570       -2.39950       -1.99760
H          3.11300       -2.77340       -1.17750
C          1.27250       -3.00840       -2.17390
H          1.01610       -3.81880       -1.49610
C          0.36670       -0.33230       -3.04830
H         -0.57000        0.18400       -2.86460
C          1.52540        0.30690       -2.65230
H          1.42180        1.30430       -2.23400
C          0.31550       -1.49090       -4.03530
H         -0.62420       -1.42170       -4.59230
H          1.11310       -1.36010       -4.77270
C          0.39940       -2.90360       -3.40610
H          0.76540       -3.61910       -4.15710
H         -0.60580       -3.23700       -3.13140
C          3.23120       -1.59420       -3.06810
H          4.30770       -1.73360       -2.92680
H          2.99780       -2.02220       -4.04750
C          2.93350       -0.07500       -3.06170
H          3.14420        0.34130       -4.05790
H          3.62750        0.41940       -2.37720
S          2.94940       -0.45950        0.61900
Ir         0.89240       -1.12610       -0.83380
H         -0.50700       -1.78560       -1.18870
C          1.30400        1.18370        2.40180
C          2.24690       -0.02170        2.28930
C          3.38010        0.11100        3.33840
H          4.22580        0.65110        2.90100
H          3.73210       -0.89800        3.57560
C          0.56350        1.15620        3.75790
H         -0.34710        0.56140        3.64060
H          0.24800        2.18020        3.98410
C          1.43440        0.58480        4.90060
H          1.13260        1.03280        5.85290
H          1.26360       -0.49500        4.99700
C          2.92110        0.83520        4.62750
H          3.53550        0.49450        5.46750
H          3.09600        1.91460        4.53350
O          0.31600        1.34240        1.34180
H          0.83190       -2.15760        0.38340
C          4.36980        0.62410        0.28040
C          5.63760       -0.01400        0.36650
C          4.26000        1.98090       -0.09500
C          6.77900        0.74330        0.08170
C          5.43860        2.69170       -0.36850
C          6.68570        2.08580       -0.28090
H          7.75340        0.26770        0.14710
H          5.36130        3.73660       -0.65760
H          7.58510        2.65460       -0.49900
C          2.95600        2.72800       -0.21670
H          2.09240        2.06730       -0.19910
H          2.84240        3.44850        0.60280
H          2.93180        3.30530       -1.14720
C          5.82040       -1.46650        0.75140
H          5.41290       -1.68230        1.74440
H          5.32280       -2.14380        0.04920
H          6.88450       -1.71790        0.76170
H          1.67210       -0.93300        2.48690
H          1.89220        2.09860        2.31340
P         -0.41190        0.28880        0.37500
O         -1.23080        1.26800       -0.63040
O         -1.55000       -0.31690        1.40520
C         -2.47040        1.88820       -0.35490
C         -2.56490       -1.11080        0.82490
C         -3.54290        1.03840       -0.03660
C         -2.60190        3.28150       -0.50370
C         -3.41420       -0.45740       -0.08640
C         -2.72780       -2.45850        1.19310
C         -4.78000        1.60930        0.34640
C         -3.86710        3.78890       -0.17670
C         -1.48980        4.22920       -1.01150
C         -4.25360       -1.23370       -0.91480
C         -3.61090       -3.18010        0.37490
C         -2.14910       -3.08180        2.48720
C         -4.93070        3.00580        0.27340
C         -5.93750        0.77930        0.85630
H         -4.03950        4.85440       -0.26060
C         -0.37580        4.36510        0.05070
C         -0.90340        3.71420       -2.34850
C         -2.03130        5.64980       -1.28840
C         -4.30820       -2.62440       -0.70220
C         -5.08030       -0.61680       -2.01980
H         -3.76580       -4.23340        0.57510
C         -2.58530       -2.19980        3.68490
C         -2.70930       -4.49930        2.73210
C         -0.61170       -3.19880        2.47440
C         -6.23250        3.67200        0.65740
H         -6.76400        0.75030        0.13420
H         -5.65050       -0.24940        1.07520
H         -6.34170        1.21760        1.77570
H          0.08150        3.40580        0.29060
H          0.40770        5.04060       -0.31440
H         -0.77920        4.78820        0.97850
H         -0.44240        2.73090       -2.24890
H         -1.68540        3.64810       -3.11430
H         -0.13960        4.41310       -2.70970
H         -2.84630        5.64460       -2.02080
H         -2.38490        6.14710       -0.37880
H         -1.22050        6.26180       -1.69830
C         -5.16780       -3.51190       -1.57270
H         -4.88990       -1.12940       -2.97030
H         -6.15600       -0.71190       -1.82350
H         -4.85680        0.44210       -2.15850
H         -2.21140       -2.63040        4.62160
H         -2.19770       -1.18080        3.60160
H         -3.67800       -2.14530        3.75070
H         -2.39980       -5.20680        1.95450
H         -2.32360       -4.87330        3.68680
H         -3.80290       -4.50640        2.79150
H         -0.26730       -3.82200        1.64210
H         -0.13380       -2.22290        2.38760
H         -0.27110       -3.66180        3.40850
H         -6.19080        4.74830        0.46680
H         -6.46190        3.53160        1.72170
H         -7.08170        3.26300        0.09620
H         -4.83920       -3.49190       -2.61980
H         -6.21830       -3.19500       -1.56740
H         -5.12920       -4.55050       -1.23170
117
15_Intermediate_C
C          2.30470        2.21850        1.17430
H          2.27660        2.35740        0.10010
C          1.12370        2.38640        1.86820
H          0.24340        2.68080        1.30500
C          2.11430        0.21260        3.60460
H          1.61570       -0.61890        4.09350
C          3.16220       -0.10440        2.74970
H          3.41890       -1.15850        2.66730
C          1.87890        1.58790        4.21310
H          1.40270        1.44990        5.18850
H          2.85030        2.05080        4.41180
C          0.99280        2.53780        3.36990
H          1.21310        3.57980        3.64390
H         -0.05670        2.37020        3.63050
C          3.68460        2.24450        1.81420
H          4.38930        2.66460        1.09000
H          3.67060        2.93920        2.65920
C          4.21860        0.86440        2.26330
H          4.97010        0.99470        3.05610
H          4.74600        0.40350        1.42550
S          2.87470       -1.10700       -0.32680
C          0.56970       -2.41590       -1.14670
C          1.89050       -1.86750       -1.71270
C          2.68510       -2.97710       -2.41270
H          2.83420       -3.80520       -1.70940
H          3.67920       -2.61220       -2.68700
C         -0.00530       -3.53750       -2.03310
H         -1.09160       -3.54670       -1.90280
H          0.36930       -4.49670       -1.65500
C          0.38970       -3.37060       -3.50430
H         -0.10590       -4.13300       -4.11420
H          0.02270       -2.40140       -3.86480
C          1.92570       -3.45940       -3.67480
H          2.23440       -2.86470       -4.54180
H          2.22310       -4.49360       -3.88110
O         -0.42330       -1.34730       -1.11930
H          0.71010       -2.79000       -0.13060
H          1.65270       -1.07760       -2.42790
P         -0.57210       -0.21760        0.02490
O         -1.20250        0.90600       -0.99810
O         -1.81150       -0.66720        0.99830
C         -2.31590        1.73800       -0.76800
C         -2.99200       -1.19900        0.43440
C         -3.50520        1.15190       -0.29770
C         -2.23860        3.10310       -1.11580
C         -3.74050       -0.32810       -0.36500
C         -3.38630       -2.51620        0.72600
C         -4.54830        1.98960        0.16340
C         -3.32410        3.88420       -0.69630
C         -1.13110        3.71840       -2.00310
C         -4.79380       -0.85100       -1.14860
C         -4.47120       -2.97800       -0.03390
C         -2.79020       -3.36830        1.87150
C         -4.42960        3.37960       -0.00960
C         -5.77950        1.43720        0.84750
H         -3.31330        4.94680       -0.90490
C          0.21660        3.76680       -1.26190
C         -0.99180        2.88430       -3.30120
C         -1.47070        5.16350       -2.42860
C         -5.13330       -2.20820       -0.99470
C         -5.54690       -0.00760       -2.15220
H         -4.81920       -3.99290        0.11460
C         -2.88080       -2.56560        3.19360
C         -3.58090       -4.67880        2.07420
C         -1.32060       -3.75750        1.60810
C         -5.50260        4.32550        0.47820
H         -6.67650        1.55170        0.22500
H         -5.67820        0.38010        1.09550
H         -5.97320        1.98400        1.77760
H          0.53900        2.76620       -0.97710
H          0.99020        4.20190       -1.90620
H          0.14570        4.38380       -0.35920
H         -0.70610        1.85040       -3.09610
H         -1.93630        2.87460       -3.85740
H         -0.22570        3.32880       -3.94760
H         -2.42340        5.22250       -2.96600
H         -1.51080        5.85050       -1.57610
H         -0.68640        5.52600       -3.10210
C         -6.23870       -2.83150       -1.81580
H         -5.58000       -0.51290       -3.12450
H         -6.58930        0.15320       -1.84730
H         -5.08580        0.97010       -2.29780
H         -2.48690       -3.16740        4.02150
H         -2.30570       -1.63720        3.14550
H         -3.92210       -2.31370        3.42550
H         -3.51660       -5.34120        1.20360
H         -3.15830       -5.21860        2.92850
H         -4.63850       -4.49270        2.29010
H         -1.22130       -4.30990        0.66690
H         -0.67350       -2.88010        1.57640
H         -0.95780       -4.40490        2.41570
H         -5.27880        5.35510        0.18400
H         -5.59340        4.30480        1.57210
H         -6.49010        4.06760        0.07600
H         -6.00010       -2.82420       -2.88730
H         -7.18700       -2.29170       -1.70130
H         -6.40660       -3.87120       -1.52000
Ir         1.24610        0.04560        1.42050
H          0.07600        0.22090        2.47300
H          0.98490       -1.50570        1.71530
C          4.25110       -0.30220       -1.19120
C          5.54300       -0.81920       -0.91230
C          4.06840        0.77560       -2.08480
C          6.64340       -0.20580       -1.52270
C          5.20620        1.35120       -2.66860
C          6.48180        0.87380       -2.38880
H          7.63860       -0.58930       -1.31670
H          5.07650        2.18520       -3.35340
H          7.35000        1.33680       -2.84890
C          5.78790       -2.00840       -0.00740
H          5.46190       -1.82650        1.02230
H          5.25310       -2.89840       -0.35560
H          6.85540       -2.24360        0.01990
C          2.71840        1.31630       -2.48670
H          2.76890        2.39720       -2.64680
H          2.38550        0.87060       -3.43320
H          1.94820        1.11590       -1.74080
117
15_Intermediate_D
C          1.67490       -2.87630       -0.53030
H          1.53810       -2.81890        0.54490
C          0.53900       -2.89290       -1.31340
H         -0.42350       -2.86900       -0.80910
C          2.14420       -1.33890       -3.24980
H          1.89520       -0.52190       -3.92010
C          3.18050       -1.11660       -2.34990
H          3.68560       -0.15450       -2.40710
C          1.63360       -2.71640       -3.65110
H          1.28640       -2.66210       -4.68740
H          2.47690       -3.41370       -3.64940
C          0.47870       -3.26850       -2.78000
H          0.44880       -4.36440       -2.86770
H         -0.47330       -2.90400       -3.17810
C          3.05600       -3.31770       -0.99670
H          3.58680       -3.73880       -0.13700
H          2.93990       -4.14100       -1.70820
C          3.93640       -2.20310       -1.61450
H          4.66700       -2.65130       -2.30400
H          4.52790       -1.72710       -0.82950
S          2.78320       -0.05540        0.78280
C          4.25200        0.98500        0.55080
C          5.46240        0.43780        1.06040
C          4.23940        2.22210       -0.13240
C          6.64860        1.15170        0.85610
C          5.45940        2.89520       -0.30040
C          6.65240        2.36950        0.17990
H          7.57860        0.74390        1.24130
H          5.45830        3.85000       -0.81960
H          7.58390        2.90910        0.03500	
C          5.54100       -0.86240        1.83350
H          4.97410       -0.81420        2.76890
H          5.14730       -1.71330        1.26920
H          6.58190       -1.08120        2.08670
C          3.00970        2.87720       -0.71190
H          2.08250        2.51640       -0.27470
H          3.06160        3.96180       -0.57090
H          2.94680        2.69420       -1.79200
C          0.82050        1.76920        1.98970
C          1.79800        0.61320        2.23470
C          2.74210        0.95470        3.41680
H          3.66510        1.40310        3.03730
H          3.01750        0.01440        3.90500
C         -0.10850        1.96070        3.21180
H         -0.97120        1.30090        3.08470
H         -0.48470        2.98880        3.17840
C          0.59360        1.67780        4.55940
H          0.15890        2.30820        5.34210
H          0.41680        0.63840        4.86510
C          2.10160        1.91640        4.44490
H          2.59520        1.77920        5.41300
H          2.28480        2.95730        4.14890
O         -0.01450        1.64720        0.80670
H          1.38800        2.68340        1.80140
H          1.21290       -0.27770        2.48100
P         -0.48180        0.34870       -0.01880
O         -1.38600       -0.40440        1.14270
O         -1.55590        0.96690       -1.06740
C         -2.45740       -1.25690        0.80410
C         -2.72720        1.62410       -0.63060
C         -3.52300       -0.65920        0.09600
C         -2.48220       -2.60220        1.21160
C         -3.66360        0.83540        0.05290
C         -2.93500        2.97390       -0.96030
C         -4.51210       -1.47780       -0.48560
C         -3.52030       -3.36640        0.64640
C         -1.63440       -3.28650        2.31660
C         -4.78250        1.46310        0.64610
C         -4.08580        3.53930       -0.39260
C         -2.05200        3.77890       -1.94300
C         -4.47970       -2.86400       -0.22820
C         -5.59420       -0.92070       -1.38260
H         -3.58400       -4.41810        0.90590
C         -1.03300       -4.62110        1.81450
C         -0.48580       -2.43630        2.88720
C         -2.59520       -3.58820        3.49860
C         -4.97390        2.84040        0.42900
C         -5.76370        0.71160        1.51730
H         -4.30710        4.58180       -0.58610
C         -1.96580        3.02350       -3.29300
C         -2.65570        5.16950       -2.23680
C         -0.62980        4.00740       -1.38510
C         -5.50270       -3.79550       -0.83600
H         -6.58520       -0.99320       -0.91570
H         -5.42060        0.12500       -1.63920
H         -5.64630       -1.49300       -2.31620
H         -0.34640       -4.46450        0.97640
H         -0.47030       -5.09740        2.62580
H         -1.80040       -5.33040        1.49100
H          0.26270       -2.19930        2.12820
H         -0.84720       -1.50000        3.32010
H          0.01380       -3.00470        3.68000
H         -3.03560       -2.66370        3.88920
H         -3.41230       -4.25330        3.20280
H         -2.04320       -4.07340        4.31260
C         -6.14860        3.56870        1.04140
H         -5.91410        1.24030        2.46580
H         -6.75050        0.63530        1.04240
H         -5.42460       -0.29920        1.74710
H         -1.36540        3.60380       -4.00420
H         -1.50250        2.04050       -3.18120
H         -2.96310        2.88780       -3.72760
H         -2.69250        5.80350       -1.34370
H         -2.02620        5.67960       -2.97400
H         -3.66610        5.10160       -2.65460
H         -0.66420        4.51580       -0.41470
H         -0.08570        3.07240       -1.25910
H         -0.06190        4.64010       -2.07830
H         -5.35970       -4.81940       -0.47890
H         -5.43430       -3.81150       -1.93140
H         -6.52790       -3.49290       -0.58910
H         -6.09830        3.56860        2.13810
H         -7.10420        3.10290        0.77050
H         -6.17760        4.61100        0.71090
Ir         1.21020       -0.59540       -1.23510
H          0.09060       -0.65960       -2.35890
H          1.35090        0.89910       -1.77320
117
16_Intermediate_A
C          2.87140       -1.96780       -1.66610
H          3.62720       -1.90380       -0.88950
C          1.88370       -2.92540       -1.49380
H          1.94430       -3.54980       -0.60570
C          0.12260       -0.98270       -2.85810
H         -0.91500       -0.72530       -2.67120
C          1.04610        0.04450       -2.81510
H          0.66970        1.04870       -2.63500
C          0.37480       -2.33620       -3.50910
H         -0.57220       -2.69920       -3.92080
H          1.04220       -2.19560       -4.36440
C          0.94100       -3.42780       -2.56690
H          1.46210       -4.19190       -3.16240
H          0.11280       -3.94120       -2.06930
C          3.23030       -1.32890       -3.00380
H          4.30110       -1.10270       -2.99230
H          3.08880       -2.07310       -3.79320
C          2.46090       -0.03010       -3.34880
H          2.44370        0.10450       -4.44030
H          3.00850        0.82760       -2.95120
S          2.78410        0.95870       -0.07590
Ir         1.01560       -0.92910       -0.62560
H         -0.13270       -2.02750       -0.60460
C          0.99750        1.63010        2.06580
C          2.27570        2.09400        1.36110
C          3.42190        2.34510        2.35180
H          4.29380        2.73030        1.81550
H          3.72680        1.40310        2.81980
C          0.59750        2.58920        3.19250
H         -0.28690        2.18040        3.69290
H          0.29890        3.54090        2.73440
C          1.74470        2.82690        4.18240
H          1.42370        3.54690        4.94310
H          1.98340        1.89370        4.71100
C          2.99170        3.33330        3.44880
H          3.82390        3.46890        4.14890
H          2.78660        4.31620        3.00330
O         -0.10830        1.65390        1.11340
H          1.31240       -1.50660        0.83200
P         -0.59660        0.35000        0.30560
O         -1.58670        0.96350       -0.82910
O         -1.59570       -0.29000        1.43400
C         -2.82450        1.56920       -0.50120
C         -2.54400       -1.24360        1.01450
C         -3.79000        0.74380        0.09920
C         -3.05150        2.91200       -0.84720
C         -3.58050       -0.74040        0.20030
C         -2.45950       -2.58430        1.41300
C         -4.98480        1.32910        0.57660
C         -4.27280        3.43180       -0.39460
C         -2.11370        3.75420       -1.74490
C         -4.45200       -1.64220       -0.44010
C         -3.37520       -3.44010        0.77200
C         -1.55610       -3.19630        2.51330
C         -5.21010        2.69700        0.33470
C         -6.01230        0.54220        1.35860
H         -4.51240        4.46620       -0.60720
C         -0.72620        3.97570       -1.10170
C         -1.95020        3.04020       -3.11000
C         -2.70540        5.15180       -2.03030
C         -4.31800       -3.02040       -0.16340
C         -5.50810       -1.18570       -1.42060
H         -3.34370       -4.49890        1.00900
C         -2.47920       -3.87690        3.55980
C         -0.62050       -4.26230        1.89590
C         -0.68820       -2.18470        3.28900
C         -6.46780        3.37740        0.82520
H         -6.94220        0.41290        0.78940
H         -5.65120       -0.44820        1.63800
H         -6.28030        1.07430        2.27870
H         -0.16940        3.04590       -0.98910
H         -0.13510        4.65010       -1.73320
H         -0.81990        4.43530       -0.11130
H         -1.51680        2.04300       -3.00030
H         -2.91870        2.93710       -3.61290
H         -1.29270        3.62740       -3.76260
H         -3.68140        5.09570       -2.52430
H         -2.81300        5.74930       -1.11790
H         -2.02780        5.69290       -2.69960
C         -5.21300       -4.03800       -0.83270
H         -5.44000       -1.75990       -2.35200
H         -6.52020       -1.34620       -1.02710
H         -5.41010       -0.12830       -1.66990
H         -1.86960       -4.31610        4.35820
H         -3.15860       -3.14690        4.01480
H         -3.08520       -4.67840        3.12780
H          0.06300       -3.80440        1.17350
H         -0.02020       -4.73370        2.68360
H         -1.17950       -5.05330        1.38520
H          0.07430       -1.72810        2.65630
H         -1.28910       -1.38770        3.73750
H         -0.17600       -2.71700        4.09940
H         -6.50530        4.41790        0.48960
H         -6.52720        3.37870        1.92130
H         -7.37230        2.87390        0.46190
H         -5.07560       -4.04460       -1.92160
H         -6.27460       -3.82850       -0.65110
H         -5.00240       -5.04620       -0.46450
C          4.48990        0.44060        0.26960
C          5.49310        1.13020       -0.46010
C          4.82420       -0.59210        1.17710
C          6.82590        0.73420       -0.29190
C          6.17630       -0.94350        1.30640
C          7.16840       -0.29960        0.57520
H          7.60180        1.25530       -0.84540
H          6.44450       -1.73330        2.00270
H          8.20820       -0.59080        0.69280
C          3.82930       -1.35090        2.02500
H          2.97540       -0.74430        2.32760
H          3.42700       -2.21930        1.49010
H          4.31960       -1.72380        2.92920
C          5.20580        2.28850       -1.39150
H          4.63370        1.97890       -2.27230
H          4.63050        3.08000       -0.90050
H          6.14440        2.72510       -1.74380
H          1.11710        0.61490        2.45720
H          2.03670        3.02750        0.84150

117
16_Intermediate_B
C          2.48890       -2.72200       -1.37440
H          3.16880       -2.86540       -0.53900
C          1.29160       -3.41880       -1.31090
H          1.13130       -4.05560       -0.44450
C          0.15200       -1.07790       -2.71750
H         -0.80490       -0.58010       -2.59390
C          1.28980       -0.30760       -2.57250
H          1.14840        0.75380       -2.39000
C          0.12260       -2.43950       -3.39990
H         -0.84910       -2.55610       -3.89000
H          0.86830       -2.44660       -4.20040
C          0.33930       -3.65480       -2.46380
H          0.70550       -4.51000       -3.05070
H         -0.62260       -3.96310       -2.04320
C          3.09260       -2.16440       -2.65770
H          4.18240       -2.20070       -2.56390
H          2.83950       -2.83760       -3.48250
C          2.68380       -0.71110       -3.00600
H          2.78070       -0.55700       -4.09090
H          3.39390       -0.02340       -2.54260
S          2.99660       -0.21330        0.72260
Ir         0.86570       -1.29050       -0.43300
H         -0.49550       -2.09730       -0.52310
C          1.14540        0.94010        2.52890
C          2.59530        1.05450        2.04510
C          3.58600        0.86550        3.20950
H          4.60610        0.99660        2.83390
H          3.50950       -0.16510        3.57990
C          0.86840        1.88990        3.69960
H         -0.16440        1.73300        4.02860
H          0.93510        2.91850        3.32240
C          1.85930        1.69370        4.85440
H          1.64220        2.42140        5.64420
H          1.72340        0.69720        5.29720
C          3.30260        1.84370        4.35980
H          4.01150        1.65530        5.17420
H          3.47410        2.87520        4.02240
O          0.22630        1.34790        1.46720
H          0.93590       -1.97960        1.00810
C          4.44520        0.52450       -0.08320
C          5.66250       -0.19160        0.04770
C          4.37960        1.73680       -0.80540
C          6.80600        0.33700       -0.56360
C          5.55650        2.22130       -1.39450
C          6.75850        1.53190       -1.27850
H          7.74590       -0.19980       -0.47070
H          5.51560        3.15230       -1.95390
H          7.65820        1.92260       -1.74530
C          3.11900        2.55090       -0.96730
H          2.21870        1.95290       -0.82410
H          3.08490        3.37630       -0.24490
H          3.07900        3.00100       -1.96410
C          5.79050       -1.48720        0.81970
H          5.46700       -1.37700        1.85970
H          5.18780       -2.29070        0.38260
H          6.83210       -1.82010        0.82200
P         -0.47880        0.29200        0.47780
O         -1.14020        1.23950       -0.66260
O         -1.73410       -0.16880        1.43840
C         -2.36220        1.94420       -0.53740
C         -2.73940       -0.94930        0.82740
C         -3.50830        1.18140       -0.25760
C         -2.39350        3.32860       -0.78900
C         -3.47150       -0.31910       -0.19450
C         -3.00490       -2.25670        1.27090
C         -4.73370        1.84890       -0.01950
C         -3.64560        3.93030       -0.60390
C         -1.18840        4.16350       -1.27980
C         -4.28840       -1.10760       -1.03350
C         -3.86490       -2.98760        0.43560
C         -2.55570       -2.81340        2.64460
C         -4.78940        3.24320       -0.19520
C         -5.97830        1.12420        0.44360
H         -3.74320        4.99550       -0.77130
C         -0.11040        4.26530       -0.17780
C         -0.59670        3.53380       -2.56430
C         -1.59860        5.60770       -1.64360
C         -4.44500       -2.47350       -0.72820
C         -4.98510       -0.53080       -2.24460
H         -4.09620       -4.01410        0.69330
C         -3.02930       -1.82850        3.74410
C         -3.20730       -4.18170        2.93780
C         -1.02920       -3.00210        2.75760
C         -6.07230        4.00930        0.03380
H         -6.74250        1.08820       -0.34380
H         -5.77320        0.10020        0.75620
H         -6.42950        1.65050        1.29230
H          0.27440        3.29000        0.11700
H          0.72960        4.87330       -0.53570
H         -0.51960        4.75040        0.71640
H         -0.25680        2.51000       -2.40220
H         -1.34360        3.52070       -3.36690
H          0.25770        4.12780       -2.91000
H         -2.36870        5.63570       -2.42250
H         -1.96190        6.16850       -0.77560
H         -0.71970        6.13680       -2.02780
C         -5.29160       -3.37240       -1.59990
H         -4.75110       -1.12380       -3.13690
H         -6.07680       -0.55130       -2.13380
H         -4.68660        0.50060       -2.43880
H         -2.75220       -2.21330        4.73280
H         -2.57550       -0.84080        3.62560
H         -4.11880       -1.71140        3.72040
H         -2.87900       -4.95560        2.23460
H         -2.91470       -4.50630        3.94220
H         -4.30130       -4.13230        2.91200
H         -0.65160       -3.67340        1.97900
H         -0.49570       -2.05500        2.67430
H         -0.78620       -3.44140        3.73270
H         -5.94840        5.06400       -0.22870
H         -6.39040        3.96370        1.08360
H         -6.90000        3.60830       -0.56380
H         -4.88820       -3.44620       -2.61810
H         -6.31860       -2.99800       -1.69590
H         -5.34130       -4.38420       -1.18730
H          0.92350       -0.09080        2.82510
H          2.72280        2.04090        1.59260
117
16_Intermediate_C
C          2.08590       -2.49930       -0.86750
H          2.13130       -2.45880        0.21470
C          0.85010       -2.72300       -1.43600
H          0.00560       -2.86830       -0.76900
C          1.78670       -0.93650       -3.59870
H          1.27970       -0.18210       -4.19290
C          2.90430       -0.52140       -2.88740
H          3.19930        0.51840       -3.00940
C          1.45730       -2.38490       -3.93030
H          0.92120       -2.40110       -4.88410
H          2.39410       -2.92440       -4.09830
C          0.59480       -3.12060       -2.87550
H          0.74420       -4.20540       -2.97660
H         -0.46270       -2.93770       -3.08960
C          3.41350       -2.69260       -1.58450
H          4.15570       -3.01710       -0.84850
H          3.31440       -3.51670       -2.29720
C          3.95880       -1.43260       -2.29660
H          4.65590       -1.72930       -3.09430
H          4.55140       -0.85190       -1.58510
S          2.90230        1.06690       -0.08110
C          0.81910        1.82360        1.75660
C          2.02390        2.35930        0.96220
C          2.98520        3.20050        1.84070
H          2.70300        4.25290        1.71620
H          4.01260        3.11640        1.47860
C          0.39090        2.83390        2.81970
H         -0.55010        2.49790        3.26590
H          0.18240        3.78730        2.31880
C          1.48480        3.00920        3.89750
H          1.37870        4.00660        4.33740
H          1.32400        2.29220        4.71030
C          2.91190        2.82830        3.32740
H          3.24130        1.79110        3.45510
H          3.62420        3.44200        3.88890
O         -0.31200        1.65600        0.85640
P         -0.60700        0.32850       -0.00860
O         -1.34290       -0.55050        1.18290
O         -1.80800        0.80580       -0.99330
C         -2.39850       -1.45410        0.95380
C         -3.00170        1.36890       -0.49490
C         -3.55220       -0.95970        0.31640
C         -2.31750       -2.76740        1.45730
C         -3.82410        0.51570        0.25230
C         -3.33930        2.69250       -0.82510
C         -4.52110       -1.87870       -0.14730
C         -3.33250       -3.63070        1.02130
C         -1.30290       -3.21350        2.53640
C         -4.95050        1.06060        0.91170
C         -4.49650        3.17050       -0.19410
C         -2.58240        3.55110       -1.86640
C         -4.37690       -3.23990        0.17970
C         -5.69810       -1.44380       -0.99180
H         -3.31430       -4.66430        1.34530
C          0.13900       -3.23760        1.99800
C         -1.39370       -2.23860        3.73800
C         -1.61740       -4.62700        3.07040
C         -5.26910        2.41360        0.69070
C         -5.80390        0.25130        1.86220
H         -4.81530        4.18800       -0.38420
C         -2.51420        2.78490       -3.21120
C         -3.31240        4.88440       -2.13800
C         -1.15310        3.90420       -1.39670
C         -5.37080       -4.26940       -0.30640
H         -6.64930       -1.56200       -0.45680
H         -5.61810       -0.40270       -1.30730
H         -5.76750       -2.06460       -1.89270
H          0.42250       -2.26740        1.58830
H          0.83870       -3.48330        2.80580
H          0.25340       -3.99590        1.21600
H         -1.12790       -1.21690        3.45620
H         -2.40850       -2.22720        4.15190
H         -0.70970       -2.56250        4.53160
H         -2.62150       -4.68970        3.50370
H         -1.52700       -5.39440        2.29350
H         -0.89910       -4.87510        3.85950
C         -6.45690        3.05370        1.37230
H         -5.92440        0.78440        2.81260
H         -6.81430        0.09110        1.46410
H         -5.37150       -0.72590        2.07900
H         -2.00720        3.40100       -3.96370
H         -1.96600        1.84470       -3.11690
H         -3.52130        2.56190       -3.58280
H         -3.34750        5.52630       -1.25050
H         -2.77080        5.43210       -2.91680
H         -4.33680        4.72980       -2.49410
H         -1.17170        4.41380       -0.42650
H         -0.52360        3.01980       -1.30360
H         -0.68430        4.57780       -2.12470
H         -5.13440       -5.26020        0.09250
H         -5.37410       -4.34310       -1.40170
H         -6.39640       -4.02170       -0.00530
H         -6.33480        3.07470        2.46300
H         -7.38730        2.50850        1.17060
H         -6.59240        4.08520        1.03420
Ir         1.09050       -0.33480       -1.42500
H         -0.15990       -0.65130       -2.34070
H          0.85910        1.15170       -1.97640
C          4.35920        0.49000        0.84000
C          5.60150        1.00360        0.37700
C          4.30610       -0.44020        1.90150
C          6.77340        0.56680        1.00630
C          5.51210       -0.84850        2.49000
C          6.73450       -0.35180        2.05270
H          7.72830        0.95520        0.66410
H          5.47840       -1.56670        3.30490
H          7.65660       -0.68060        2.52320
C          5.72930        1.99380       -0.76210
H          5.36090        1.58240       -1.70800
H          5.16530        2.91400       -0.57830
H          6.77910        2.26520       -0.90310
C          3.02860       -1.00740        2.46640
H          3.16720       -2.05320        2.75710
H          2.72030       -0.46650        3.37020
H          2.20730       -0.95640        1.75320
H          1.03590        0.86340        2.22860
H          1.61330        2.99550        0.17300
117
16_Intermediate_D
C          1.67440       -2.78030       -0.33670
H          1.55350       -2.66680        0.73620
C          0.52930       -2.84280       -1.10560
H         -0.42890       -2.80810       -0.59400
C          2.10180       -1.37420       -3.13760
H          1.84200       -0.58590       -3.83770
C          3.14350       -1.11480       -2.25630
H          3.64550       -0.15500       -2.35350
C          1.58810       -2.76890       -3.47120
H          1.21360       -2.75710       -4.49920
H          2.43710       -3.45940       -3.46470
C          0.45910       -3.29770       -2.54990
H          0.45220       -4.39710       -2.57870
H         -0.50650       -2.97590       -2.95170
C          3.04050       -3.25600       -0.81190
H          3.58740       -3.64770        0.05180
H          2.90020       -4.10710       -1.48520
C          3.91160       -2.17420       -1.49370
H          4.62240       -2.65340       -2.18320
H          4.52460       -1.67190       -0.74300
S          2.69930        0.26510        0.85520
C          4.43050        0.67730        0.49760
C          5.40220       -0.07820        1.20300
C          4.80470        1.68050       -0.42520
C          6.75370        0.17870        0.94420
C          6.17440        1.89410       -0.64350
C          7.14110        1.15340        0.02730
H          7.50750       -0.39480        1.47600
H          6.47440        2.65950       -1.35420
H          8.19530        1.33560       -0.16090
C          5.05080       -1.13660        2.22680
H          4.48380       -0.71640        3.06430
H          4.44030       -1.94130        1.80380
H          5.96300       -1.58630        2.62830
C          3.82910        2.56870       -1.16150
H          2.87030        2.08070       -1.34320
H          3.63430        3.48830       -0.59420
H          4.24740        2.87470       -2.12530
C          0.58690        1.73010        2.01220
C          2.07500        1.84580        1.65470
C          2.91560        2.11840        2.91650
H          3.96700        2.22890        2.63560
H          2.84870        1.24910        3.58380
C          0.10210        2.95890        2.79150
H         -0.95050        2.80020        3.04840
H          0.14370        3.82320        2.11610
C          0.94840        3.23290        4.04000
H          0.58630        4.14320        4.53050
H          0.82530        2.41430        4.76280
C          2.42770        3.36910        3.66450
H          3.04380        3.51220        4.55940
H          2.57020        4.25800        3.03470
O         -0.23230        1.69670        0.80980
P         -0.59300        0.34820        0.00620
O         -1.45910       -0.39570        1.19250
O         -1.68380        0.84540       -1.08510
C         -2.48860       -1.31120        0.91150
C         -2.88920        1.46510       -0.68670
C         -3.58090       -0.81300        0.16750
C         -2.44500       -2.62140        1.41410
C         -3.79410        0.66840        0.02980
C         -3.14720        2.78880       -1.07880
C         -4.52830       -1.71900       -0.34990
C         -3.44570       -3.47390        0.91150
C         -1.54710       -3.17460        2.55210
C         -4.94440        1.27710        0.58320
C         -4.32690        3.33080       -0.54930
C         -2.28450        3.58190       -2.08960
C         -4.42890       -3.08060        0.00720
C         -5.63760       -1.27990       -1.27880
H         -3.45790       -4.50680        1.24490
C         -0.86280       -4.49560        2.12600
C         -0.45470       -2.21340        3.06250
C         -2.48010       -3.46730        3.75830
C         -5.19310        2.63250        0.29590
C         -5.89810        0.53210        1.48970
H         -4.58920        4.35340       -0.79140
C         -2.19100        2.78380       -3.41440
C         -2.91990        4.94950       -2.42220
C         -0.86220        3.86200       -1.55280
C         -5.40760       -4.10020       -0.52790
H         -6.62250       -1.36220       -0.80110
H         -5.51280       -0.24920       -1.61300
H         -5.66660       -1.92170       -2.16690
H         -0.19160       -4.34610        1.27460
H         -0.26720       -4.88620        2.95940
H         -1.58560       -5.26980        1.85120
H          0.27480       -1.95940        2.29050
H         -0.87780       -1.28190        3.44840
H          0.08420       -2.70250        3.88230
H         -2.97600       -2.55150        4.09980
H         -3.25500       -4.19860        3.50930
H         -1.89410       -3.86900        4.59370
C         -6.40420        3.33790        0.86270
H         -6.07800        1.10570        2.40640
H         -6.87730        0.38640        1.01510
H         -5.51710       -0.44830        1.77780
H         -1.60120        3.34810       -4.14690
H         -1.71300        1.81170       -3.27100
H         -3.18760        2.61880       -3.84040
H         -2.97040        5.60620       -1.54630
H         -2.30290        5.45310       -3.17430
H         -3.92870        4.84760       -2.83700
H         -0.89930        4.38080       -0.58820
H         -0.28230        2.94850       -1.42380
H         -0.32610        4.50440       -2.26230
H         -5.21320       -5.08940       -0.10330
H         -5.34370       -4.18770       -1.62020
H         -6.44540       -3.83170       -0.29420
H         -6.36940        3.38620        1.95890
H         -7.33680        2.82310        0.60030
H         -6.47020        4.36320        0.48740
Ir         1.16820       -0.54840       -1.14480
H          0.05840       -0.70200       -2.26790
H          1.24380        0.93120       -1.74800
H          2.19010        2.65410        0.92900
H          0.40280        0.82360        2.59900
93
21_Intermediate_A
P          1.99840       -0.86690        0.04010
C          3.52840        0.03270       -0.41480
C          2.34010       -2.62990       -0.28750
C          4.78070       -0.52070       -0.09100
C          3.47200        1.28860       -1.03800
C          2.24300       -3.11320       -1.60250
C          2.72170       -3.50130        0.74450
C          5.95220        0.17320       -0.38810
H          4.84130       -1.49540        0.38360
C          4.64920        1.97960       -1.33490
H          2.51550        1.73340       -1.29610
C          2.53030       -4.44930       -1.88030
H          1.93900       -2.45110       -2.40780
C          3.00020       -4.84030        0.45960
H          2.79560       -3.13610        1.76220
S         -0.82540        0.62750        1.44990
C          5.88790        1.42340       -1.01160
H          6.91490       -0.26320       -0.13840
H          4.59590        2.95020       -1.81950
C          2.90700       -5.31530       -0.84970
H          2.45410       -4.81480       -2.90020
H          3.28980       -5.50980        1.26440
C         -2.39600       -0.01760        2.07560
H          6.80250        1.96030       -1.24620
H          3.12430       -6.35710       -1.06710
C         -3.39050        0.93210        2.41310
C         -2.61400       -1.40680        2.21890
C         -4.61100        0.45580        2.91020
C         -3.84780       -1.82460        2.73660
C         -4.83830       -0.90770        3.07730
H         -5.38510        1.17060        3.17500
H         -4.02880       -2.88830        2.86300
H         -5.78840       -1.25600        3.47260
C         -3.19810        2.42730        2.27500
H         -2.42070        2.80060        2.95030
H         -2.89930        2.71790        1.26340
H         -4.12850        2.94890        2.51620
C         -1.61210       -2.46100        1.81220
H         -0.58900       -2.22860        2.11770
H         -1.88460       -3.42830        2.24380
H         -1.59930       -2.57390        0.72180
C          1.78990        0.30600        2.44940
H          2.03210        1.18380        1.83520
C          0.32710        0.37520        2.90750
H          0.06230       -0.58660        3.35580
C          0.10410        1.51600        3.91690
H         -0.93500        1.49240        4.26100
H          0.25450        2.47770        3.40890
C          2.74820        0.24390        3.64580
H          3.77310        0.24530        3.25910
H          2.59370       -0.71910        4.15010
C          2.52250        1.39220        4.63680
H          3.20520        1.27920        5.48650
H          2.76940        2.35050        4.15890
C          1.06530        1.41440        5.11180
H          0.89010        2.26080        5.78590
H          0.84940        0.50210        5.68460
O          2.01840       -0.90320        1.68710
Ir         0.02910       -0.08940       -0.85300
H          0.68690       -0.45030       -2.25570
H         -0.37960       -1.58130       -0.83150
C         -1.38300        0.90890       -2.45230
C         -2.20870        0.24320       -1.53860
H         -2.57410        0.84150       -0.70880
C         -0.96890        2.31950       -2.16090
C          0.28070        2.80330       -2.59720
C         -1.82170        3.22520       -1.49630
C          0.66860        4.12160       -2.35110
H          0.95420        2.14800       -3.13990
C         -1.43280        4.53980       -1.26690
H         -2.81580        2.90880       -1.19620
C         -0.17630        5.01440       -1.68240
H          1.64030        4.46220       -2.69930
H         -2.12260        5.21780       -0.77030
C         -3.04170       -0.96950       -1.76420
C         -4.37150       -0.92070       -1.30820
C         -2.60020       -2.14970       -2.38990
C         -5.24050       -1.99510       -1.50070
H         -4.72860       -0.02890       -0.79940
C         -3.46740       -3.22590       -2.57800
H         -1.56560       -2.24140       -2.70250
C         -4.79270       -3.15210       -2.14090
H         -6.26410       -1.92880       -1.14290
H         -3.10180       -4.12860       -3.05960
H         -5.46470       -3.99310       -2.28670
C          0.22870        6.44650       -1.43300
H         -0.47390        7.14280       -1.90660
H          0.23220        6.67620       -0.36050
H          1.22770        6.65440       -1.82720
C         -1.21500        0.46540       -3.89260
H         -1.42290       -0.59300       -4.03590
H         -1.92680        1.03920       -4.50180
H         -0.21470        0.67710       -4.27530
93
21_Intermediate_B
P         -2.23470        0.27290        0.11070
C         -3.02860       -1.14870       -0.72450
C         -3.41580        1.65880       -0.04400
C         -4.35670       -1.49050       -0.41290
C         -2.31860       -1.91410       -1.65920
C         -3.53950        2.31590       -1.27890
C         -4.21990        2.05590        1.03490
C         -4.95880       -2.58490       -1.03090
H         -4.91910       -0.89940        0.30420
C         -2.92720       -3.00750       -2.28000
H         -1.29330       -1.65530       -1.90560
C         -4.45900        3.35290       -1.43190
H         -2.91890        2.02260       -2.12050
C         -5.13330        3.10130        0.87670
H         -4.12980        1.55310        1.99070
S          0.82600        0.00820        1.78640
C         -4.24520       -3.34290       -1.96590
H         -5.98530       -2.84380       -0.78860
H         -2.37110       -3.59390       -3.00560
C         -5.25560        3.74910       -0.35340
H         -4.54960        3.85400       -2.39120
H         -5.74870        3.40650        1.71820
H         -4.71920       -4.19260       -2.44880
H         -5.96710        4.56120       -0.47280
C         -1.74650       -1.15920        2.34510
H         -1.53680       -1.92770        1.59410
C         -0.44520       -0.68560        3.00510
H         -0.68980        0.20290        3.59730
C          0.17000       -1.75240        3.92490
H          1.05060       -1.33880        4.42650
H          0.51680       -2.60530        3.33070
C         -2.73620       -1.70100        3.38410
H         -3.61530       -2.08080        2.85180
H         -3.07250       -0.85650        4.00000
C         -2.11440       -2.77970        4.27900
H         -2.84960       -3.10370        5.02410
H         -1.86240       -3.66510        3.67860
C         -0.85100       -2.24620        4.96350
H         -0.38440       -3.02520        5.57720
H         -1.11750       -1.42370        5.64110
O         -2.41370       -0.03780        1.71480
Ir        -0.08500        0.72870       -0.52770
H         -0.76030        1.28550       -1.85220
H         -0.34880        2.15760        0.01050
C          1.66180        1.11610       -2.12500
C          2.17330        1.41100       -0.85830
H          2.67950        0.59130       -0.35530
C          1.78680       -0.27790       -2.66350
C          0.85180       -0.77750       -3.59170
C          2.87310       -1.10820       -2.32400
C          0.98850       -2.05320       -4.13660
H          0.00050       -0.17050       -3.88230
C          3.00760       -2.37730       -2.87900
H          3.63940       -0.75010       -1.64440
C          2.06940       -2.87760       -3.79510
H          0.24540       -2.41050       -4.84510
H          3.86410       -2.98730       -2.60290
C          2.57950        2.74360       -0.32910
C          3.87200        2.83610        0.22080
C          1.78760        3.90530       -0.34760
C          4.36530        4.04630        0.71030
H          4.50110        1.94980        0.25390
C          2.27890        5.11470        0.14520
H          0.77180        3.86360       -0.72540
C          3.57020        5.19330        0.67240
H          5.36940        4.08960        1.12290
H          1.64460        5.99660        0.12280
H          3.94850        6.13620        1.05700
C          2.24040       -4.24350       -4.41410
H          2.98540       -4.21730       -5.22000
H          2.58960       -4.97550       -3.67770
H          1.30280       -4.60840       -4.84450
C          1.38320        2.18880       -3.16010
H          1.18090        3.16160       -2.71610
H          2.27680        2.28090       -3.79280
H          0.54870        1.92750       -3.81330
C          2.22540       -1.14770        1.76830
C          3.37890       -0.72210        2.47320
C          2.20440       -2.37180        1.05930
C          4.51850       -1.53690        2.43140
C          3.37150       -3.14850        1.05610
C          4.52020       -2.73710        1.72700
H          5.40950       -1.22110        2.96650
H          3.36980       -4.09300        0.51960
H          5.41280       -3.35590        1.70650
C          0.99100       -2.91260        0.34100
H          0.17970       -3.14620        1.03900
H          0.59210       -2.21680       -0.40300
H          1.24530       -3.83840       -0.18160
C          3.43450        0.55780        3.27930
H          4.40080        0.63970        3.78500
H          3.30630        1.44540        2.65160
H          2.65080        0.59190        4.04350
93
21_Intermediate_C
P         -1.97850       -0.64310        0.74280
C         -3.60390        0.04870        0.25390
C         -2.18520       -1.29810        2.43310
C         -4.75000       -0.76320        0.33210
C         -3.72310        1.36670       -0.21150
C         -2.08100       -0.41870        3.52280
C         -2.47950       -2.65190        2.65860
C         -5.99170       -0.26110       -0.05240
H         -4.67280       -1.78340        0.69650
C         -4.97040        1.86560       -0.59540
H         -2.84840        2.00740       -0.27250
C         -2.27750       -0.88820        4.82150
H         -1.84100        0.62750        3.35870
C         -2.66670       -3.11580        3.96250
H         -2.55280       -3.33830        1.82280
S          0.76990       -0.76620       -1.43700
C         -6.10310        1.05390       -0.51640
H         -6.87250       -0.89320        0.01250
H         -5.05290        2.88700       -0.95500
C         -2.56880       -2.23710        5.04320
H         -2.19680       -0.20190        5.65930
H         -2.88830       -4.16570        4.13090
C          2.40080       -1.52290       -1.21220
H         -7.07260        1.44350       -0.81370
H         -2.71560       -2.60210        6.05570
C          3.36860       -1.25950       -2.21050
C          2.68300       -2.35440       -0.10480
C          4.62210       -1.87300       -2.09000
C          3.95020       -2.95180       -0.04240
C          4.91100       -2.71900       -1.02220
H          5.37410       -1.68450       -2.85110
H          4.17940       -3.60450        0.79550
H          5.88480       -3.19570       -0.95330
C          3.12010       -0.34460       -3.39030
H          2.27250       -0.67420       -3.99930
H          2.90210        0.68110       -3.07170
H          4.00460       -0.31190       -4.03270
C          1.72090       -2.60310        1.03290
H          0.68700       -2.74140        0.71010
H          2.02330       -3.48960        1.59790
H          1.72560       -1.75180        1.72470
C         -1.74550       -2.06110       -1.52660
H         -2.12130       -1.11270       -1.93450
C         -0.27330       -2.25330       -1.91510
H          0.12130       -3.10160       -1.34900
C         -0.11240       -2.50360       -3.42550
H          0.94410       -2.68850       -3.64590
H         -0.40240       -1.59700       -3.97270
C         -2.61300       -3.21720       -2.04160
H         -3.65560       -3.00040       -1.78500
H         -2.32570       -4.12220       -1.49000
C         -2.44830       -3.45170       -3.54810
H         -3.05910       -4.30940       -3.85140
H         -2.82700       -2.58230       -4.10380
C         -0.97450       -3.68320       -3.90070
H         -0.85010       -3.80750       -4.98260
H         -0.62270       -4.61230       -3.43160
O         -1.89100       -2.06290       -0.08400
Ir        -0.23210        0.75420        0.40000
H          0.42090        0.03880        1.60800
H         -0.91910        1.73030        1.44630
C          1.18510        2.46990       -0.42570
H          1.78410        1.90710       -1.13810
C          1.64920        2.43790        0.88640
C          2.93050        1.72200        1.17310
C          3.12600        1.01690        2.37420
C          4.01030        1.79900        0.27670
C          4.33780        0.38790        2.64680
H          2.31720        0.93760        3.09470
C          5.22500        1.17730        0.56090
H          3.91420        2.38030       -0.63550
C          5.41030        0.45120        1.74480
H          4.45420       -0.16140        3.57790
H          6.04530        1.26600       -0.14720
C          6.71340       -0.25590        2.02830
H          7.56970        0.31690        1.65670
H          6.85280       -0.42700        3.10040
H          6.73840       -1.23530        1.53210
C          1.15690        3.32380        2.01170
H          1.81270        4.20360        2.07520
H          0.12960        3.65800        1.87980
H          1.22460        2.80830        2.97230
C          0.17480        3.33580       -1.08560
C         -0.26210        4.58580       -0.59870
C         -0.34210        2.89560       -2.32740
C         -1.19660        5.33830       -1.30710
H          0.15450        4.99630        0.31170
C         -1.28430        3.64740       -3.02800
H          0.01170        1.95520       -2.74180
C         -1.72150        4.87040       -2.51630
H         -1.50780        6.30330       -0.91740
H         -1.66540        3.28310       -3.97760
H         -2.44940        5.46390       -3.06160
93
21_Intermediate_D
P          2.20810        0.47350       -0.17120
C          3.33140       -0.71650        0.64770
C          3.09150        2.07380       -0.16560
C          4.62870       -0.89860        0.13600
C          2.92480       -1.44230        1.77660
C          3.25820        2.75140        1.05310
C          3.61330        2.62710       -1.34380
C          5.50120       -1.79780        0.74590
H          4.95490       -0.33510       -0.73340
C          3.80470       -2.33940        2.38710
H          1.92620       -1.31070        2.18440
C          3.94280        3.96530        1.09100
H          2.85400        2.33570        1.97180
C          4.29190        3.84800       -1.29920
H          3.48970        2.10810       -2.28710
S         -0.86490       -0.53070       -1.48210
C          5.09010       -2.51790        1.87270
H          6.50180       -1.93410        0.34640
H          3.48410       -2.89750        3.26190
C          4.45850        4.51700       -0.08580
H          4.07010        4.48150        2.03810
H          4.68990        4.27300       -2.21620
H          5.77310       -3.21580        2.34830
H          4.98690        5.46550       -0.05500
C          1.85120       -1.13340       -2.31810
H          1.93260       -1.91760       -1.55730
C          0.40120       -1.00440       -2.81140
H          0.36030       -0.13060       -3.47050
C         -0.04140       -2.25350       -3.58970
H         -1.06000       -2.11360       -3.96310
H         -0.06720       -3.11850       -2.91660
C          2.79510       -1.45780       -3.48460
H          3.80640       -1.57630       -3.08040
H          2.81510       -0.58800       -4.15430
C          2.35600       -2.70440       -4.26160
H          3.03840       -2.86850       -5.10310
H          2.43130       -3.59110       -3.61670
C          0.91440       -2.54960       -4.75760
H          0.58080       -3.46010       -5.26840
H          0.86160       -1.73470       -5.49240
O          2.32670        0.11990       -1.77160
Ir         0.09030        0.53650        0.63190
H          0.03570        1.93150       -0.04350
H          0.68430        1.31130        1.88820
C         -2.02670        0.22160        1.68590
H         -2.60370       -0.22190        0.87800
C         -1.98150        1.61270        1.68300
C         -2.69270        2.37060        0.60670
C         -2.20820        3.60840        0.14400
C         -3.92330        1.92170        0.09960
C         -2.90790        4.34320       -0.80820
H         -1.26660        3.99670        0.52020
C         -4.62660        2.66920       -0.84650
H         -4.36070        1.00020        0.47180
C         -4.13110        3.88800       -1.32580
H         -2.50040        5.29100       -1.15170
H         -5.58530        2.30260       -1.20500
C         -4.87900        4.68600       -2.36640
H         -5.92360        4.36840       -2.43940
H         -4.86120        5.75720       -2.13740
H         -4.42550        4.56130       -3.35850
C         -1.58860        2.45260        2.87880
H         -2.49820        2.93250        3.26340
H         -1.14150        1.87000        3.68170
H         -0.89670        3.25320        2.60460
C         -1.81820       -0.72870        2.81320
C         -0.78610       -0.65820        3.77140
C         -2.72700       -1.80270        2.90450
C         -0.69090       -1.60670        4.79170
H         -0.03650        0.12180        3.70780
C         -2.63550       -2.74290        3.92890
H         -3.51960       -1.89150        2.16640
C         -1.61640       -2.64800        4.88050
H          0.11460       -1.52970        5.51660
H         -3.35810       -3.55250        3.98080
H         -1.54030       -3.38230        5.67730
C         -1.94110       -1.97160       -1.23910
C         -3.20290       -1.91830       -1.88130
C         -1.57750       -3.06410       -0.41800
C         -4.09510       -2.97930       -1.67510
C         -2.50550       -4.10170       -0.25410
C         -3.75360       -4.06210       -0.87000
H         -5.06590       -2.95100       -2.16170
H         -2.23670       -4.95070        0.36810
H         -4.45690       -4.87750       -0.72620
C         -0.25160       -3.17650        0.29570
H         -0.11860       -4.18950        0.68620
H          0.59540       -2.96100       -0.35870
H         -0.19270       -2.49270        1.15120
C         -3.62810       -0.78010       -2.78350
H         -3.63540        0.17960       -2.25720
H         -2.95820       -0.66630       -3.64330
H         -4.63520       -0.96400       -3.16860
93
21_Intermediate_F
P         -0.55270        2.02120        0.18120
C          0.22060        2.80770        1.63880
C         -2.18770        2.82360       -0.01050
C          0.60110        4.16000        1.60580
C          0.40420        2.06250        2.81220
C         -3.21560        2.51070        0.89350
C         -2.42040        3.77050       -1.01930
C          1.16690        4.75110        2.73460
H          0.45390        4.74720        0.70410
C          0.96490        2.66070        3.94240
H          0.10390        1.01780        2.83710
C         -4.45640        3.13860        0.79000
H         -3.05310        1.77640        1.67660
C         -3.66870        4.38930       -1.12270
H         -1.63200        4.02040       -1.71920
S          1.25240       -0.42570       -1.53880
C          1.34830        4.00300        3.90260
H          1.46330        5.79550        2.70510
H          1.10400        2.07940        4.84920
C         -4.68640        4.07690       -0.22030
H         -5.24420        2.89060        1.49530
H         -3.84160        5.11680       -1.91070
C          2.79940       -1.27350       -1.10290
H          1.78730        4.46820        4.78050
H         -5.65550        4.56060       -0.30320
C          3.48370       -1.01880        0.10770
C          3.27400       -2.23530       -2.03060
C          4.66590       -1.72890        0.35840
C          4.45450       -2.92460       -1.72170
C          5.15010       -2.67260       -0.54290
H          5.20630       -1.53620        1.28080
H          4.82960       -3.66330       -2.42440
H          6.06790       -3.21190       -0.32590
C          3.00500       -0.04540        1.15800
H          2.72010        0.92150        0.74020
H          2.13270       -0.43520        1.69650
H          3.79030        0.13100        1.89840
C          2.57760       -2.55770       -3.33570
H          2.51960       -1.69080       -4.00200
H          3.12040       -3.34610       -3.86430
H          1.55100       -2.90090       -3.17900
C          1.58360        2.47500       -1.45400
H          2.17610        2.39640       -0.53640
C          1.76360        1.22300       -2.32840
H          1.04460        1.29550       -3.15160
C          3.19160        1.14270       -2.89560
H          3.27920        0.27230       -3.55050
H          3.90450        0.99740       -2.07580
C          1.99640        3.74130       -2.22070
H          1.88550        4.59760       -1.54660
H          1.28150        3.88330       -3.04190
C          3.41950        3.65610       -2.78150
H          3.64400        4.56780       -3.34660
H          4.14500        3.60830       -1.95750
C          3.56680        2.41710       -3.66910
H          4.59610        2.32040       -4.03330
H          2.92350        2.51570       -4.55410
O          0.19340        2.68640       -1.11630
Ir        -0.58800       -0.22650        0.28020
H         -1.78800       -0.04830        1.30430
H         -1.71650       -0.13290       -0.77920
C         -1.24290       -2.77340       -0.08090
C         -0.94150       -2.46410        1.23690
H         -1.79400       -2.16920        1.84040
C         -2.67430       -2.75380       -0.51390
C         -3.04420       -2.37760       -1.81930
C         -3.69730       -3.15770        0.36030
C         -4.37750       -2.37720       -2.21680
H         -2.28710       -2.04920       -2.52500
C         -5.03180       -3.16400       -0.04650
H         -3.45130       -3.49920        1.36140
C         -5.40010       -2.77190       -1.33930
H         -4.63060       -2.06220       -3.22640
H         -5.79780       -3.48930        0.65300
C          0.25510       -2.73340        2.06730
C          0.31450       -2.06660        3.31190
C          1.28210       -3.64860        1.76380
C          1.36930       -2.27300        4.19770
H         -0.49150       -1.38990        3.58490
C          2.33450       -3.85800        2.65500
H          1.25230       -4.22910        0.85140
C          2.39080       -3.16770        3.86830
H          1.38760       -1.74600        5.14740
H          3.11080       -4.57380        2.40070
H          3.21320       -3.33830        4.55700
C         -6.84130       -2.79820       -1.78860
H         -7.04110       -3.67270       -2.42180
H         -7.52560       -2.84560       -0.93590
H         -7.09100       -1.91020       -2.37980
C         -0.28410       -3.42580       -1.04700
H          0.75830       -3.18570       -0.84290
H         -0.40410       -4.51640       -0.98010
H         -0.50880       -3.14780       -2.07840
93
21_Intermediate_G
P         -1.68210       -0.92950        0.77420
C         -3.33980       -0.61950        0.06220
C         -1.94600       -1.23200        2.55650
C         -4.34720       -1.59290        0.18550
C         -3.61530        0.58150       -0.60580
C         -2.08970       -0.13810        3.42500
C         -2.05460       -2.53680        3.06250
C         -5.60860       -1.36450       -0.36120
H         -4.14680       -2.52260        0.70990
C         -4.88210        0.80740       -1.14940
H         -2.84300        1.33910       -0.69700
C         -2.34580       -0.34800        4.77980
H         -1.99660        0.87520        3.04670
C         -2.30210       -2.73910        4.42210
H         -1.93930       -3.38710        2.40020
S          1.09230       -0.98910       -1.37260
C         -5.87670       -0.16470       -1.02930
H         -6.38340       -2.11930       -0.26430
H         -5.08790        1.74030       -1.66580
C         -2.45030       -1.64840        5.28090
H         -2.45760        0.50430        5.44380
H         -2.37840       -3.75170        4.80770
C          2.85820       -1.34970       -1.13660
H         -6.86150        0.01060       -1.45270
H         -2.64380       -1.81000        6.33750
C          3.70670       -1.19860       -2.26240
C          3.35890       -1.78190        0.11290
C          5.06940       -1.48150       -2.10250
C          4.73010       -2.06160        0.20960
C          5.58070       -1.90940       -0.88000
H          5.73140       -1.37000       -2.95650
H          5.12670       -2.40030        1.16290
H          6.63960       -2.13000       -0.77970
C          3.22410       -0.75140       -3.62570
H          2.42270       -1.38790       -4.01100
H          2.83640        0.27180       -3.60840
H          4.05020       -0.78050       -4.34160
C          2.52620       -1.93730        1.36470
H          1.49110       -2.22010        1.16890
H          2.97080       -2.69310        2.01940
H          2.50160       -0.99400        1.92390
C         -1.10260       -2.76960       -1.10050
H         -1.64260       -2.04760       -1.72750
C          0.39500       -2.74000       -1.42920
H          0.92340       -3.30420       -0.65540
C          0.68480       -3.34380       -2.81580
H          1.76690       -3.36010       -2.97810
H          0.24940       -2.69670       -3.58830
C         -1.69580       -4.17130       -1.30050
H         -2.77340       -4.11170       -1.11350
H         -1.27020       -4.82430       -0.52730
C         -1.40280       -4.75330       -2.68770
H         -1.81410       -5.76710       -2.75060
H         -1.91090       -4.15760       -3.45900
C          0.10560       -4.76000       -2.95550
H          0.32010       -5.13700       -3.96200
H          0.60520       -5.43750       -2.24930
O         -1.31790       -2.45910        0.29860
Ir        -0.11900        0.61750        0.27360
H          0.55600        0.11290        1.57040
H         -0.98390        1.59980        1.17470
C          1.42080        2.53350        0.78270
H          0.66010        2.98200        1.41280
C          1.18820        2.58600       -0.58500
C         -0.03470        3.28070       -1.09630
C         -0.64820        2.87900       -2.30130
C         -0.60460        4.37640       -0.41450
C         -1.78950        3.52230       -2.78100
H         -0.24280        2.04840       -2.87020
C         -1.73530        5.01910       -0.90540
H         -0.13820        4.74950        0.49200
C         -2.35440        4.60550       -2.09740
H         -2.24100        3.17910       -3.70850
H         -2.13950        5.86960       -0.36190
C         -3.56060        5.33350       -2.63850
H         -3.26310        6.25980       -3.14750
H         -4.10580        4.72140       -3.36360
H         -4.25110        5.61540       -1.83630
C          2.23950        2.24380       -1.61680
H          2.83430        3.14130       -1.83500
H          2.91730        1.46040       -1.27740
H          1.79090        1.93190       -2.56050
C          2.65070        2.20460        1.54260
C          3.95970        2.32870        1.04240
C          2.49360        1.84440        2.89770
C          5.06300        2.06830        1.85810
H          4.13310        2.66270        0.02790
C          3.59370        1.57890        3.70840
H          1.49090        1.76810        3.31040
C          4.88760        1.68430        3.18810
H          6.06370        2.17680        1.44960
H          3.44270        1.29700        4.74660
H          5.74920        1.48180        3.81790

93
21_Intermediate_H
P         -1.80700       -0.97340        0.56900
C         -2.91760       -1.02180       -0.88260
C         -2.89370       -0.84030        2.03340
C         -3.86720       -2.05040       -1.01050
C         -2.83680       -0.02550       -1.86380
C         -3.57260        0.36590        2.27080
C         -3.08070       -1.92320        2.90510
C         -4.71980       -2.07590       -2.11300
H         -3.94110       -2.82290       -0.25070
C         -3.69590       -0.05200       -2.96440
H         -2.10910        0.77380       -1.75950
C         -4.42880        0.48400        3.36470
H         -3.43400        1.21380        1.60630
C         -3.93410       -1.79490        4.00400
H         -2.56320       -2.85840        2.72590
S          1.66400       -1.23520        0.15770
C         -4.63550       -1.07700       -3.08940
H         -5.45270       -2.87160       -2.20960
H         -3.63050        0.72640       -3.71910
C         -4.60880       -0.59530        4.23510
H         -4.95180        1.41980        3.53940
H         -4.06990       -2.63650        4.67720
H         -5.30440       -1.09900       -3.94490
H         -5.27180       -0.49940        5.09020
C         -0.44740       -3.19010       -0.19010
H         -0.62590       -2.77870       -1.18910
C          1.02710       -3.02220        0.20790
H          1.10220       -3.25430        1.27570
C          1.95360       -3.96070       -0.58330
H          2.97790       -3.85720       -0.21290
H          1.96870       -3.66600       -1.63870
C         -0.87640       -4.66400       -0.14880
H         -1.91090       -4.72630       -0.50390
H         -0.87750       -4.98210        0.90210
C          0.04930       -5.57410       -0.96250
H         -0.28580       -6.61310       -0.86790
H         -0.01460       -5.31730       -2.02930
C          1.49630       -5.42470       -0.48350
H          2.17010       -6.04770       -1.08300
H          1.58050       -5.77240        0.55510
O         -1.30770       -2.52180        0.76610
Ir        -0.16860        0.57600        0.44280
H         -0.04360        0.35560        1.97420
H         -1.28270        1.64560        0.80760
C          1.24470        2.51570        1.13060
H          0.39750        2.94670        1.65630
C          1.21250        2.59530       -0.25560
C          0.09260        3.31740       -0.93290
C         -0.35320        2.93930       -2.21400
C         -0.53750        4.42230       -0.32600
C         -1.40190        3.61370       -2.84020
H          0.10860        2.10450       -2.73170
C         -1.57670        5.09440       -0.95990
H         -0.19260        4.77580        0.64080
C         -2.03550        4.70220       -2.22830
H         -1.72810        3.28910       -3.82520
H         -2.03330        5.94940       -0.46700
C         -3.14780        5.45510       -2.91700
H         -2.78990        6.41830       -3.30360
H         -3.55110        4.88900       -3.76210
H         -3.96960        5.67260       -2.22570
C          2.38770        2.23520       -1.13690
H          2.94970        3.14980       -1.37100
H          3.06770        1.52790       -0.66560
H          2.06980        1.81300       -2.09160
C          2.38060        2.20310        2.03490
C          3.72540        2.47360        1.72050
C          2.09060        1.72120        3.32730
C          4.74030        2.22930        2.64890
H          3.98790        2.91070        0.76490
C          3.10280        1.47040        4.24990
H          1.05570        1.54160        3.60630
C          4.43700        1.71640        3.91090
H          5.77000        2.45240        2.38380
H          2.85070        1.09050        5.23590
H          5.22890        1.52490        4.62920
C          2.81830       -1.15980       -1.23930
C          4.19490       -1.17880       -0.90650
C          2.38840       -1.03460       -2.58060
C          5.12880       -1.06770       -1.94580
C          3.36490       -0.93060       -3.58070
C          4.72240       -0.94500       -3.27120
H          6.18780       -1.08080       -1.70390
H          3.04720       -0.83630       -4.61540
H          5.46160       -0.86030       -4.06270
C          0.93780       -1.02200       -2.99980
H          0.84820       -0.72930       -4.04980
H          0.47680       -2.01150       -2.90130
H          0.33690       -0.32760       -2.40430
C          4.70350       -1.31010        0.51280
H          4.34810       -2.22810        0.99310
H          5.79700       -1.33070        0.51820
H          4.37820       -0.47510        1.14200
93
20_Intermediate_I
P         -2.19970       -0.26310        0.00610
C         -3.21290       -1.58540       -0.74980
C         -3.22580        1.24800       -0.04250
C         -4.39490       -1.98580       -0.10100
C         -2.85670       -2.17970       -1.96840
C         -3.42520        1.88590       -1.27870
C         -3.81920        1.77580        1.11450
C         -5.20190       -2.97220       -0.66490
H         -4.68080       -1.52820        0.84140
C         -3.67290       -3.16340       -2.53210
H         -1.94700       -1.87290       -2.47320
C         -4.21080        3.03560       -1.35400
H         -2.96990        1.48710       -2.18100
C         -4.60120        2.92990        1.03130
H         -3.67280        1.28550        2.06990
S          1.00500       -0.45920        1.40990
C         -4.84210       -3.56110       -1.88140
H         -6.11140       -3.28010       -0.15740
H         -3.39140       -3.61960       -3.47670
C         -4.79730        3.56070       -0.19890
H         -4.36270        3.52190       -2.31320
H         -5.05740        3.33400        1.93050
C          1.92870        0.87560        2.21770
H         -5.47370       -4.32850       -2.31980
H         -5.40600        4.45840       -0.25870
C          3.26990        0.59850        2.57660
C          1.34190        2.13930        2.46110
C          4.00670        1.61400        3.20200
C          2.12110        3.11210        3.10150
C          3.43990        2.85700        3.46880
H          5.03700        1.41680        3.48470
H          1.68200        4.08490        3.30380
H          4.02600        3.62800        3.96080
C          3.94430       -0.73180        2.31840
H          3.44360       -1.55310        2.84110
H          3.94980       -0.99200        1.25510
H          4.98160       -0.69860        2.66320
C         -0.06280        2.50580        2.04390
H         -0.80870        1.77100        2.35710
H         -0.34400        3.47150        2.47320
H         -0.13730        2.59960        0.95350
C         -1.44960       -1.62400        2.21010
H         -1.21720       -2.38600        1.45470
C         -0.15350       -1.02690        2.77850
H         -0.41420       -0.13620        3.35750
C          0.60370       -2.03500        3.66270
H          1.47630       -1.53830        4.09910
H          0.97950       -2.85220        3.03330
C         -2.31380       -2.24580        3.31570
H         -3.18930       -2.70540        2.84460
H         -2.68070       -1.43010        3.95250
C         -1.54270       -3.26140        4.16680
H         -2.19850       -3.64630        4.95580
H         -1.25260       -4.12290        3.54910
C         -0.29060       -2.61500        4.76860
H          0.28380       -3.34760        5.34740
H         -0.58410       -1.81870        5.46640
O         -2.26030       -0.57720        1.61660
Ir        -0.11600        0.06460       -0.81490
H         -0.80050        0.22860       -2.24320
C          1.84990        0.01480       -2.42470
C          1.92970        1.04090       -1.48610
H          2.57700        0.83640       -0.63630
C          2.60750       -1.25490       -2.18570
C          2.10230       -2.49530       -2.61000
C          3.89190       -1.23360       -1.61350
C          2.83430       -3.66810       -2.43280
H          1.11830       -2.55150       -3.06610
C          4.62420       -2.40820       -1.44960
H          4.34140       -0.28730       -1.32730
C          4.10790       -3.64990       -1.84760
H          2.40920       -4.61400       -2.75920
H          5.62040       -2.35580       -1.01660
C          1.63630        2.49430       -1.62280
C          2.49480        3.37790       -0.93680
C          0.56170        3.04930       -2.34780
C          2.31620        4.75750       -1.00550
H          3.31650        2.97300       -0.35250
C          0.37840        4.43210       -2.40530
H         -0.15290        2.40570       -2.84590
C          1.25620        5.29230       -1.74340
H          3.00120        5.41490       -0.47770
H         -0.45860        4.83500       -2.96860
H          1.11140        6.36760       -1.79370
C          4.90440       -4.91840       -1.65630
H          5.90180       -4.83260       -2.10370
H          5.04930       -5.13830       -0.59120
H          4.40290       -5.77820       -2.11040
C          1.37990        0.18990       -3.85310
H          0.88960        1.14430       -4.03130
H          2.26290        0.12850       -4.50320
H          0.70260       -0.61150       -4.15880
H         -0.07140       -1.45160       -1.13740
93
20_Intermediate_J
P          2.32280        0.01510        0.04050
C          3.23540        1.56280        0.37800
C          3.36400       -0.95830       -1.10270
C          4.49370        1.48140        1.00190
C          2.72050        2.81600        0.01930
C          3.51990       -0.50360       -2.42380
C          3.99640       -2.14380       -0.69810
C          5.22070        2.64130        1.26200
H          4.90070        0.51490        1.28390
C          3.45600        3.97530        0.27800
H          1.74930        2.88470       -0.45830
C          4.30330       -1.22470       -3.32420
H          3.03570        0.41290       -2.74950
C          4.77670       -2.86210       -1.60710
H          3.88250       -2.49770        0.32000
S         -0.59730       -1.50370        1.06990
C          4.70320        3.88930        0.89870
H          6.19070        2.57280        1.74560
H          3.05100        4.94310       -0.00280
C          4.93120       -2.40570       -2.91760
H          4.42230       -0.86510       -4.34210
H          5.26480       -3.77830       -1.28730
H          5.27290        4.79180        1.10090
H          5.53920       -2.96740       -3.62100
C          1.68140       -0.66120        2.57260
H          1.27470        0.35670        2.55020
C          0.54680       -1.69250        2.57470
H          1.00380       -2.67220        2.39940
C         -0.22020       -1.72620        3.90510
H         -0.96440       -2.52770        3.87800
H         -0.76850       -0.78970        4.05000
C          2.60010       -0.83700        3.78770
H          3.34990       -0.03860        3.76870
H          3.13690       -1.78720        3.66830
C          1.82310       -0.84450        5.10960
H          2.51880       -1.00860        5.94010
H          1.35850        0.13750        5.27610
C          0.73990       -1.92920        5.08940
H          0.16120       -1.91610        6.02010
H          1.20980       -2.91970        5.02080
O          2.51740       -0.87680        1.40430
Ir         0.18770        0.18150       -0.71380
H          0.81900        1.12950       -1.82600
C         -1.66080        1.13800       -2.15330
C         -1.98530       -0.11510       -1.63680
H         -2.59860       -0.10130       -0.73920
C         -2.16100        2.37230       -1.46870
C         -1.40570        3.55980       -1.45900
C         -3.44310        2.40840       -0.89780
C         -1.90300        4.72130       -0.87720
H         -0.40960        3.56790       -1.89080
C         -3.94040        3.57980       -0.32350
H         -4.07350        1.52470       -0.92260
C         -3.18280        4.75620       -0.29890
H         -1.28880        5.61860       -0.87170
H         -4.94040        3.57780        0.10310
C         -2.04830       -1.42080       -2.35600
C         -3.19500       -2.20790       -2.13340
C         -1.06080       -1.93050       -3.22350
C         -3.36490       -3.43640       -2.77100
H         -3.96540       -1.84510       -1.45800
C         -1.22600       -3.16660       -3.85080
H         -0.14140       -1.37880       -3.40000
C         -2.37990       -3.92200       -3.63470
H         -4.26610       -4.01530       -2.58950
H         -0.44630       -3.53760       -4.51000
H         -2.50770       -4.88070       -4.12880
C         -3.72580        6.02940        0.30420
H         -3.97580        6.76010       -0.47590
H         -4.63380        5.84140        0.88520
H         -2.99010        6.50420        0.96340
C         -1.20540        1.36200       -3.58070
H         -0.78110        0.47430       -4.04450
H         -2.08650        1.66530       -4.16310
H         -0.47930        2.17450       -3.65260
C         -2.27760       -1.34440        1.72500
C         -3.07230       -2.51600        1.68490
C         -2.78670       -0.11960        2.21680
C         -4.40080       -2.42720        2.12180
C         -4.12200       -0.09040        2.64360
C         -4.92570       -1.22610        2.59110
H         -5.02280       -3.31750        2.09690
H         -4.52760        0.84110        3.02840
H         -5.95760       -1.17740        2.92700
C         -1.97900        1.15310        2.31240
H         -1.00060        0.99550        2.77390
H         -1.79920        1.59000        1.32540
H         -2.51610        1.89450        2.91050
C         -2.54960       -3.85450        1.21130
H         -3.32040       -4.62130        1.33000
H         -2.26020       -3.82710        0.15570
H         -1.66900       -4.17280        1.77990
H          0.03210        1.46250        0.13660
93
20_Intermediate_K 
P         -2.13400        0.30720       -0.06170
C         -3.57000       -0.58900       -0.75330
C         -2.52440        2.08410       -0.23620
C         -4.82410       -0.42920       -0.13570
C         -3.45610       -1.40870       -1.88480
C         -2.61720        2.62810       -1.52830
C         -2.72170        2.90950        0.88070
C         -5.94260       -1.08700       -0.64330
H         -4.92300        0.20640        0.73920
C         -4.58240       -2.06070       -2.39330
H         -2.49320       -1.53530       -2.36790
C         -2.90640        3.98130       -1.69840
H         -2.46870        1.99800       -2.40100
C         -3.00770        4.26520        0.70230
H         -2.66000        2.49320        1.87950
S          0.72630       -1.01880        1.46130
C         -5.82280       -1.90300       -1.77320
H         -6.90720       -0.96230       -0.15990
H         -4.48640       -2.69380       -3.27050
C         -3.09930        4.80240       -0.58300
H         -2.98210        4.39400       -2.70010
H         -3.16150        4.89910        1.57090
C          2.11380       -0.16170        2.24970
H         -6.69640       -2.41380       -2.16790
H         -3.32270        5.85680       -0.71730
C          3.23830       -0.94750        2.59930
C          2.07550        1.23070        2.49320
C          4.31860       -0.30740        3.22230
C          3.17730        1.81440        3.13230
C          4.28860        1.05740        3.49510
H          5.18880       -0.89600        3.49870
H          3.16000        2.88150        3.33590
H          5.13300        1.53260        3.98620
C          3.33190       -2.43480        2.33340
H          2.53440       -2.99230        2.83550
H          3.25910       -2.67010        1.26600
H          4.28960       -2.81990        2.69440
C          0.93000        2.11870        2.07070
H         -0.03460        1.79420        2.47090
H          1.10180        3.14370        2.41070
H          0.83360        2.14270        0.97910
C         -1.98640       -1.09020        2.24170
H         -2.06690       -1.92780        1.53650
C         -0.56670       -1.02090        2.82040
H         -0.46400       -0.07460        3.35780
C         -0.27690       -2.20000        3.76720
H          0.72230       -2.07300        4.19680
H         -0.26190       -3.13210        3.18750
C         -3.03440       -1.24840        3.35090
H         -4.01680       -1.35330        2.87820
H         -3.05270       -0.31550        3.92950
C         -2.73660       -2.43000        4.28260
H         -3.49260       -2.46650        5.07500
H         -2.81710       -3.37400        3.72580
C         -1.33040       -2.30470        4.87970
H         -1.10010       -3.16860        5.51370
H         -1.27960       -1.41550        5.52330
O         -2.31060        0.15180        1.56480
Ir        -0.06950       -0.21860       -0.85560
H         -0.69430        0.07350       -2.28570
C          2.10290       -0.98980       -1.55170
H          2.59520       -0.82330       -0.59600
C          1.80260        0.14760       -2.29970
C          2.14070        1.50140       -1.75790
C          1.35690        2.62700       -2.08030
C          3.28980        1.71050       -0.96760
C          1.69340        3.89640       -1.61230
H          0.47010        2.51200       -2.69480
C          3.62650        2.98210       -0.51790
H          3.94690        0.87750       -0.73850
C          2.83310        4.10040       -0.82470
H          1.06210        4.74200       -1.87290
H          4.52900        3.11320        0.07360
C          3.20100        5.47260       -0.31590
H          4.27550        5.66020       -0.41840
H          2.66190        6.25760       -0.85470
H          2.95710        5.57430        0.74980
C          1.44520        0.08300       -3.77250
H          2.35510        0.23980       -4.36690
H          1.01660       -0.88290       -4.04460
H          0.74100        0.86850       -4.05240
C          2.22040       -2.38930       -2.06000
C          2.93000       -2.67000       -3.24010
C          1.72830       -3.47140       -1.30820
C          3.11830       -3.98610       -3.66790
H          3.35930       -1.85880       -3.81880
C          1.91300       -4.78570       -1.73720
H          1.19030       -3.27760       -0.38590
C          2.60580       -5.04880       -2.92210
H          3.67190       -4.17740       -4.58300
H          1.51650       -5.60480       -1.14360
H          2.75070       -6.07240       -3.25590
H         -0.57300       -1.65850       -1.14460
93
20_Intermediate_L
P         -2.19230       -0.45970        0.04180
C         -3.14080       -1.72900       -0.86440
C         -3.29330        0.98980        0.18370
C         -4.34080       -2.20040       -0.30090
C         -2.71040       -2.23340       -2.09930
C         -3.93020        1.48490       -0.96650
C         -3.45150        1.65690        1.40790
C         -5.09450       -3.16370       -0.96810
H         -4.68050       -1.81550        0.65610
C         -3.47290       -3.19540       -2.76640
H         -1.78580       -1.87390       -2.53740
C         -4.71750        2.63330       -0.88930
H         -3.82230        0.97190       -1.91830
C         -4.24350        2.80480        1.47790
H         -2.97300        1.27230        2.30170
S          0.88180       -0.08250        1.60080
C         -4.66170       -3.66070       -2.20230
H         -6.01920       -3.52540       -0.52810
H         -3.13490       -3.58100       -3.72380
C         -4.87340        3.29590        0.33230
H         -5.21290        3.00740       -1.78050
H         -4.36950        3.31220        2.43000
H         -5.25230       -4.41020       -2.72140
H         -5.48830        4.18940        0.39060
C         -1.24740       -1.92450        2.11110
H         -0.86330       -2.53240        1.28370
C         -0.10230       -1.17480        2.80460
H         -0.56160       -0.43260        3.46580
C          0.79810       -2.10060        3.63800
H          1.54160       -1.50230        4.17330
H          1.35120       -2.78090        2.98300
C         -2.02540       -2.80300        3.09810
H         -2.78130       -3.36190        2.53560
H         -2.56250       -2.13640        3.78530
C         -1.11190       -3.73900        3.89780
H         -1.71360       -4.31430        4.61030
H         -0.63750       -4.46720        3.22520
C         -0.03250       -2.93340        4.62940
H          0.64080       -3.59900        5.18150
H         -0.50360       -2.27190        5.36930
O         -2.21100       -0.96240        1.60500
Ir        -0.14040        0.15050       -0.76230
H         -0.89870        0.30350       -2.15070
C          2.03060        0.60980       -1.63410
H          2.57680        0.70890       -0.70010
C          1.19260        1.67410       -1.98170
C          0.98780        2.80030       -1.01660
C         -0.23720        3.49940       -0.97560
C          2.01960        3.23920       -0.15900
C         -0.43020        4.56060       -0.08950
H         -1.05180        3.20490       -1.62920
C          1.82500        4.31200        0.70160
H          2.99260        2.75960       -0.19580
C          0.59280        4.98860        0.76310
H         -1.39200        5.06600       -0.07050
H          2.64680        4.64280        1.33200
C          0.39890        6.14760        1.70930
H          1.10170        6.96000        1.48710
H         -0.61560        6.55130        1.64590
H          0.58000        5.84390        2.74750
C          0.77020        1.96040       -3.40890
H          1.43870        2.73830       -3.80260
H          0.84740        1.08760       -4.05420
H         -0.24860        2.34860       -3.46820
C          2.64920       -0.37710       -2.56190
C          1.94360       -1.13440       -3.51400
C          4.04140       -0.55720       -2.47090
C          2.61230       -2.01720       -4.36230
H          0.86330       -1.05380       -3.57070
C          4.71080       -1.43710       -3.32230
H          4.60400        0.00410       -1.72940
C          3.99870       -2.16880       -4.27490
H          2.04580       -2.59390       -5.08830
H          5.78770       -1.55260       -3.23710
H          4.51630       -2.85810       -4.93600
C          2.61350       -0.59970        1.73180
C          3.45690        0.24120        2.49830
C          3.11340       -1.75070        1.07870
C          4.81900       -0.07960        2.57290
C          4.48310       -2.02680        1.19370
C          5.33170       -1.19950        1.92420
H          5.47750        0.55820        3.15570
H          4.88100       -2.90900        0.70010
H          6.39020       -1.43310        1.99520
C          2.26000       -2.69830        0.27010
H          2.83630       -3.58810        0.00200
H          1.37090       -3.02820        0.81480
H          1.91280       -2.23180       -0.65630
C          2.95240        1.44940        3.25600
H          2.46460        2.17410        2.59730
H          2.21780        1.16860        4.01980
H          3.78320        1.95060        3.76080
H          0.07180       -1.30740       -1.24440
93
20_Intermediate_N
P         -1.75420        1.13610        0.29510
C         -2.32620        1.87190        1.86630
C         -3.26460        0.58470       -0.57240
C         -3.20840        2.96670        1.81030
C         -1.92260        1.37170        3.11190
C         -4.17790       -0.23970        0.10540
C         -3.49800        0.92400       -1.91390
C         -3.67670        3.54770        2.98690
H         -3.52720        3.36130        0.84990
C         -2.39920        1.95510        4.28860
H         -1.24200        0.52860        3.15980
C         -5.31680       -0.70780       -0.54960
H         -4.01040       -0.50730        1.14500
C         -4.63940        0.45000       -2.56370
H         -2.80120        1.56680       -2.44000
S          1.24200        0.73310       -1.42070
C         -3.27380        3.04110        4.22720
H         -4.35700        4.39290        2.93760
H         -2.08430        1.56080        5.25030
C         -5.54880       -0.36430       -1.88480
H         -6.02440       -1.33570       -0.01610
H         -4.81920        0.72300       -3.59960
C          3.04910        0.61500       -1.45690
H         -3.64250        3.49400        5.14300
H         -6.43820       -0.72670       -2.39240
C          3.83660        0.80250       -0.29840
C          3.63430        0.29950       -2.70730
C          5.22550        0.65040       -0.41700
C          5.02670        0.15900       -2.76840
C          5.81780        0.32800       -1.63490
H          5.84440        0.79310        0.46430
H          5.48950       -0.08160       -3.72140
H          6.89620        0.21550       -1.70200
C          3.26410        1.15690        1.05220
H          2.60490        2.02940        1.00810
H          2.67500        0.33260        1.46410
H          4.06940        1.37960        1.75770
C          2.83110        0.12660       -3.97770
H          2.29470        1.04350       -4.24840
H          3.49320       -0.12950       -4.80950
H          2.07880       -0.66400       -3.88750
C         -0.08880        3.09970       -0.52290
H          0.33330        2.91540        0.47210
C          0.86060        2.58730       -1.61180
H          0.31340        2.62460       -2.55950
C          2.12940        3.44530       -1.72830
H          2.74020        3.08710       -2.56150
H          2.73680        3.34210       -0.82310
C         -0.39080        4.59380       -0.69670
H         -1.02270        4.91380        0.13910
H         -0.98370        4.71230       -1.61300
C          0.88420        5.43980       -0.79350
H          0.61410        6.48930       -0.95560
H          1.43470        5.39840        0.15680
C          1.77750        4.92900       -1.92890
H          2.70620        5.50860       -1.98220
H          1.26410        5.06150       -2.89120
O         -1.36570        2.42100       -0.64790
Ir        -0.20850       -0.50580        0.41090
H         -1.18690       -1.15350        1.47540
C          0.83160       -2.65020       -0.10080
C          1.01930       -2.50980        1.27010
H          0.16840       -2.74970        1.89830
C         -0.49550       -3.12590       -0.60540
C         -0.97680       -2.74500       -1.87920
C         -1.30190       -4.00460        0.15210
C         -2.21240       -3.19000       -2.34740
H         -0.38460       -2.09230       -2.51280
C         -2.52510       -4.45280       -0.32930
H         -0.94650       -4.37220        1.10940
C         -3.01310       -4.04690       -1.58350
H         -2.55240       -2.86920       -3.32860
H         -3.10950       -5.14490        0.27150
C          2.25830       -2.33390        2.06310
C          2.12330       -1.78490        3.35550
C          3.53530       -2.76650        1.66100
C          3.22300       -1.63200        4.19490
H          1.13980       -1.46800        3.69310
C          4.63660       -2.62090        2.50740
H          3.67640       -3.25150        0.70360
C          4.48990       -2.04530        3.77020
H          3.09210       -1.19730        5.18180
H          5.61140       -2.96860        2.17690
H          5.35030       -1.93170        4.42350
C         -4.35690       -4.51150       -2.08640
H         -4.33770       -4.69980       -3.16500
H         -4.68000       -5.42680       -1.58120
H         -5.12170       -3.74470       -1.90490
C          1.96700       -2.62990       -1.10000
H          2.78500       -1.98250       -0.78800
H          2.35830       -3.65000       -1.21350
H          1.63490       -2.31060       -2.08880
H          0.44820        0.29050        1.57200
93
20_Intermediate_O
P         -1.06150       -1.72620        0.42950
C         -2.81540       -2.12250        0.09610
C         -0.68760       -2.43610        2.07140
C         -3.19130       -3.47510        0.00260
C         -3.78840       -1.12310       -0.04170
C         -1.23050       -1.81970        3.21190
C          0.12050       -3.57430        2.21610
C         -4.52200       -3.81660       -0.23020
H         -2.44550       -4.25670        0.11210
C         -5.12200       -1.47160       -0.27010
H         -3.50600       -0.07840        0.03080
C         -0.96960       -2.33930        4.47940
H         -1.85830       -0.93870        3.11200
C          0.38060       -4.08580        3.48940
H          0.53900       -4.05740        1.34080
S          1.29860       -0.06870       -1.58340
C         -5.48900       -2.81490       -0.36560
H         -4.80540       -4.86250       -0.30320
H         -5.87050       -0.69180       -0.37540
C         -0.16140       -3.47140        4.62000
H         -1.39600       -1.86010        5.35580
H          1.00690       -4.96710        3.59480
C          3.07800        0.11260       -1.26900
H         -6.52610       -3.08350       -0.54500
H          0.04360       -3.87310        5.60810
C          3.83630        0.85750       -2.20520
C          3.67800       -0.47600       -0.13190
C          5.21310        0.99180       -1.97670
C          5.05950       -0.31740        0.04020
C          5.82280        0.40950       -0.86930
H          5.80860        1.55940       -2.68630
H          5.53510       -0.76930        0.90610
H          6.89230        0.52190       -0.71510
C          3.24550        1.51780       -3.43280
H          2.74470        0.80090       -4.08970
H          2.50340        2.27790       -3.17150
H          4.03500        2.00660       -4.01020
C          2.90520       -1.24800        0.91040
H          2.27770       -2.03230        0.47840
H          3.59190       -1.72100        1.61800
H          2.24610       -0.58630        1.48540
C         -0.10390       -2.51950       -1.94360
H         -0.93140       -1.88060       -2.27860
C          1.23850       -1.83860       -2.23800
H          2.02040       -2.38490       -1.70280
C          1.54770       -1.81410       -3.74600
H          2.54550       -1.39130       -3.89690
H          0.83380       -1.14900       -4.24890
C         -0.20430       -3.89440       -2.61860
H         -1.20500       -4.29510       -2.42390
H          0.51270       -4.56220       -2.12290
C          0.09220       -3.84130       -4.12160
H          0.04490       -4.85410       -4.53750
H         -0.68040       -3.25240       -4.63510
C          1.46750       -3.21470       -4.37220
H          1.66970       -3.13870       -5.44670
H          2.25050       -3.85730       -3.94630
O         -0.22910       -2.77380       -0.51970
Ir        -0.41840        0.42750        0.28700
H         -1.63390        0.71760        1.26920
C          0.12830        2.56220        1.31830
H         -0.75340        2.60330        1.95000
C         -0.06010        3.00920        0.01780
C         -1.39770        3.56270       -0.36140
C         -1.92180        3.39680       -1.65740
C         -2.15390        4.31310        0.55430
C         -3.15870        3.93040       -2.00630
H         -1.37060        2.82230       -2.39600
C         -3.39030        4.85210        0.19670
H         -1.76160        4.51000        1.54770
C         -3.92160        4.66620       -1.08540
H         -3.54020        3.77370       -3.01260
H         -3.94380        5.43850        0.92620
C         -5.27030        5.22740       -1.46730
H         -5.59800        5.99690       -0.76150
H         -5.25070        5.66820       -2.47020
H         -6.03630        4.44070       -1.47710
C          1.05500        3.28310       -0.96340
H          1.34520        4.34020       -0.88290
H          1.94080        2.67400       -0.78690
H          0.72320        3.12590       -1.99150
C          1.35850        2.27310        2.09580
C          2.63910        2.78670        1.81140
C          1.20330        1.48510        3.25910
C          3.72080        2.49520        2.64170
H          2.79190        3.44580        0.96640
C          2.28830        1.18800        4.08110
H          0.21640        1.10600        3.51170
C          3.55500        1.68910        3.77140
H          4.69750        2.90910        2.40840
H          2.14230        0.57480        4.96560
H          4.40300        1.46750        4.41290
H         -1.49540        0.66130       -0.80480
93
20_Intermediate_P
P         -1.66820       -1.33510        0.33090
C         -2.99980       -1.28450       -0.92150
C         -2.49150       -1.59270        1.94380
C         -3.70460       -2.46940       -1.20000
C         -3.35230       -0.09820       -1.58100
C         -3.42130       -0.63810        2.39040
C         -2.19850       -2.70470        2.74760
C         -4.74090       -2.46400       -2.13210
H         -3.44040       -3.39110       -0.69090
C         -4.39630       -0.09810       -2.50910
H         -2.81520        0.82070       -1.37160
C         -4.05220       -0.79930        3.62310
H         -3.65890        0.22590        1.77600
C         -2.83260       -2.85770        3.98290
H         -1.49100       -3.45040        2.40400
S          1.81610       -1.08750        0.02300
C         -5.08800       -1.27840       -2.78740
H         -5.27780       -3.38350       -2.34640
H         -4.66400        0.82440       -3.01590
C         -3.75720       -1.90840        4.42200
H         -4.77450       -0.06080        3.95850
H         -2.60450       -3.72300        4.59870
H         -5.89610       -1.27640       -3.51330
H         -4.24910       -2.03180        5.38250
C         -0.01970       -3.12490       -0.88340
H         -0.20180       -2.49200       -1.75770
C          1.39840       -2.90200       -0.33300
H          1.42120       -3.33800        0.67150
C          2.49300       -3.55960       -1.19020
H          3.45850       -3.45050       -0.68600
H          2.57980       -3.04220       -2.15090
C         -0.27110       -4.59910       -1.23320
H         -1.25730       -4.67370       -1.70420
H         -0.32220       -5.15890       -0.29030
C          0.82160       -5.20000       -2.12360
H          0.59850       -6.25690       -2.30850
H          0.82850       -4.70230       -3.10360
C          2.19150       -5.04240       -1.45670
H          2.98360       -5.45570       -2.09160
H          2.21150       -5.60590       -0.51390
O         -0.99580       -2.81770        0.14840
Ir        -0.26530        0.42770        0.41140
C          0.69940        2.45740        1.34760
H         -0.23020        2.73400        1.83940
C          0.79110        2.80030        0.00510
C         -0.31380        3.58660       -0.62360
C         -0.64080        3.44170       -1.98460
C         -1.03210        4.54000        0.11860
C         -1.65840        4.19370       -2.56450
H         -0.11650        2.71360       -2.59530
C         -2.04630        5.29550       -0.46880
H         -0.78070        4.71730        1.15990
C         -2.38200        5.13800       -1.81970
H         -1.89590        4.04510       -3.61520
H         -2.57720        6.02930        0.13280
C         -3.45890        5.97850       -2.46260
H         -3.02710        6.85630       -2.96180
H         -4.00770        5.41300       -3.22330
H         -4.17660        6.34450       -1.72170
C          2.05810        2.68680       -0.80640
H          2.53880        3.67380       -0.85570
H          2.76810        1.97750       -0.38520
H          1.84950        2.38780       -1.83590
C          1.75700        2.07640        2.31430
C          3.09880        2.49210        2.22960
C          1.36090        1.34000        3.44890
C          4.01090        2.15410        3.23080
H          3.42910        3.11160        1.40420
C          2.27550        0.98900        4.43980
H          0.31710        1.04970        3.55130
C          3.60870        1.39350        4.33210
H          5.03890        2.49690        3.15350
H          1.94510        0.41470        5.30070
H          4.32370        1.13390        5.10730
C          3.06990       -0.60870       -1.19580
C          4.39320       -0.48260       -0.70590
C          2.75510       -0.33440       -2.54660
C          5.38700       -0.04770       -1.59300
C          3.78900        0.09550       -3.39030
C          5.09110        0.24430       -2.92180
H          6.40540        0.05660       -1.22960
H          3.55980        0.31280       -4.43000
H          5.87570        0.58260       -3.59280
C          1.37940       -0.51240       -3.14190
H          1.28380        0.06720       -4.06460
H          1.19280       -1.56220       -3.40280
H          0.58970       -0.20280       -2.45410
C          4.78530       -0.80220        0.72000
H          4.52580       -1.83110        0.99270
H          5.86530       -0.68320        0.84650
H          4.28790       -0.14470        1.43980
H         -0.63290        0.71330       -1.06230
H         -1.56170        1.28490        0.74230
129
22_Intermediate_A
S         -2.06280       -0.01830        1.52880
C         -3.41580       -1.18030        1.84800
C         -4.57890       -0.62280        2.43980
C         -3.35360       -2.54490        1.48450
C         -5.66760       -1.47070        2.67860
C         -4.47080       -3.34770        1.75630
C         -5.61570       -2.82210        2.34670
H         -6.56370       -1.05890        3.13400
H         -4.43410       -4.40000        1.48910
H         -6.46900       -3.46430        2.54550
C         -4.70390        0.83590        2.82270
H         -3.97830        1.12100        3.59160
H         -4.53870        1.50000        1.96820
H         -5.70390        1.03410        3.21820
C         -2.18290       -3.18010        0.77720
H         -1.21720       -2.82670        1.13590
H         -2.21440       -4.26730        0.89280
H         -2.22310       -2.96000       -0.29590
C          0.32370       -1.26280        2.69600
C         -0.76670       -0.19610        2.87000
C         -1.42600       -0.34460        4.26320
H         -2.28640       -1.01720        4.19480
H         -1.80740        0.63810        4.55800
C          1.47730       -1.01400        3.69650
H          2.19370       -0.33470        3.22660
H          1.99200       -1.96850        3.84890
C          0.99010       -0.43360        5.04300
H          1.66550       -0.74670        5.84590
H          1.02930        0.66310        5.01470
C         -0.44620       -0.87870        5.33590
H         -0.77200       -0.52950        6.32150
H         -0.48700       -1.97500        5.36650
O          0.89260       -1.38520        1.36350
H         -0.11530       -2.24790        2.86860
H         -0.29590        0.78910        2.79500
P          1.03340       -0.29400        0.19000
O          1.99310        0.81820        0.92240
O          1.99570       -1.05070       -0.87690
C          2.92180        1.58820        0.19090
C          3.25860       -1.53940       -0.46350
C          3.98840        0.87190       -0.39370
C          2.80600        2.98450        0.12180
C          4.20730       -0.57950       -0.07740
C          3.51800       -2.91860       -0.51100
C          4.88200        1.54470       -1.25260
C          3.77360        3.61530       -0.68080
C          1.82910        3.90450        0.89620
C          5.40830       -1.01610        0.52600
C          4.74850       -3.29850        0.04430
C          2.59350       -3.95280       -1.19610
C          4.76070        2.94240       -1.39430
C          5.95240        0.82170       -2.03900
H          3.74910        4.69650       -0.76480
C          1.20140        4.94250       -0.06530
C          0.66630        3.18810        1.60850
C          2.64880        4.65010        1.98070
C          5.66060       -2.39880        0.60250
C          6.41460       -0.04980        1.10850
H          5.01410       -4.34850        0.06100
C          2.31560       -3.50810       -2.65410
C          3.25640       -5.34580       -1.26270
C          1.25580       -4.11980       -0.44200
C          5.69950        3.72020       -2.28770
H          6.95860        1.07120       -1.67810
H          5.84030       -0.26210       -1.99500
H          5.91570        1.12140       -3.09270
H          0.65280        4.44610       -0.87210
H          0.49400        5.57320        0.48510
H          1.94330        5.60600       -0.51810
H          0.04230        2.62350        0.90660
H          1.02270        2.50890        2.38620
H          0.02940        3.94140        2.08590
H          3.08550        3.94390        2.69620
H          3.46480        5.23330        1.54190
H          2.00010        5.33930        2.53500
C          6.92430       -2.92330        1.24520
H          6.65640       -0.32920        2.14090
H          7.36040       -0.06350        0.55160
H          6.04540        0.97650        1.11680
H          1.68830       -4.25530       -3.15530
H          1.79710       -2.54740       -2.69550
H          3.25030       -3.41980       -3.22000
H          3.42430       -5.77360       -0.26790
H          2.59250       -6.02830       -1.80440
H          4.21350       -5.32190       -1.79530
H          1.42520       -4.39570        0.60500
H          0.65960       -3.20810       -0.46040
H          0.66710       -4.91710       -0.91160
H          5.51200        4.79500       -2.20960
H          5.58090        3.43780       -3.34200
H          6.75050        3.54110       -2.03020
H          6.97000       -2.67120        2.31260
H          7.82430       -2.49870        0.78320
H          6.98430       -4.01210        1.15830
Ir        -0.95130        0.18500       -0.78970
H         -0.14400        0.39810       -2.13930
H         -0.88690       -1.30860       -1.18740
C         -3.10570       -0.07800       -1.73400
H         -3.70710        0.06440       -0.84080
C         -2.60810        1.08710       -2.32600
C         -3.39350       -1.38350       -2.39440
C         -4.67010       -1.93130       -2.17110
C         -2.50300       -2.09490       -3.21900
C         -5.05830       -3.12650       -2.77720
H         -5.36820       -1.40940       -1.52150
C         -2.88980       -3.29260       -3.82100
H         -1.49280       -1.72940       -3.36750
C         -4.16990       -3.81080       -3.60910
H         -6.05260       -3.52360       -2.59340
H         -2.18340       -3.82530       -4.45140
H         -4.46710       -4.74420       -4.07860
C         -2.86230        2.41090       -1.67960
C         -2.01550        3.50950       -1.92850
C         -3.99680        2.63760       -0.87200
C         -2.28440        4.76420       -1.38470
H         -1.13810        3.38790       -2.55480
C         -4.25780        3.89280       -0.33340
H         -4.71120        1.83930       -0.70110
C         -3.40460        4.98200       -0.57260
H         -1.61300        5.59050       -1.60170
H         -5.15300        4.03630        0.26650
C         -3.68260        6.33610        0.03170
H         -3.24810        6.41120        1.03750
H         -3.24990        7.14030       -0.57150
H         -4.75790        6.51720        0.12940
C         -2.16730        1.14720       -3.77470
H         -1.98510        0.16260       -4.19950
H         -2.97180        1.62610       -4.34880
H         -1.26780        1.75060       -3.91190
129
22_Intermediate_B
S         -1.83400       -1.28050        1.41080
C          0.60090       -1.43150        2.74950
C         -0.76610       -0.74060        2.84760
C         -1.41500       -1.10430        4.20630
H         -1.98710       -2.03200        4.10340
H         -2.13300       -0.32080        4.46420
C          1.58200       -0.84020        3.78430
H          2.09270        0.01220        3.32810
H          2.34460       -1.59860        3.99070
C          0.87180       -0.40790        5.08760
H          1.56920       -0.47970        5.92860
H          0.57550        0.64690        5.02020
C         -0.37180       -1.26740        5.34110
H         -0.83830       -1.00480        6.29630
H         -0.07190       -2.31980        5.42200
O          1.21860       -1.41860        1.43120
H          0.45430       -2.50000        2.92700
H         -0.63310        0.34010        2.76240
P          1.15240       -0.31800        0.26030
O          2.00080        0.90290        0.95380
O          2.15970       -0.94600       -0.84910
C          2.79220        1.77970        0.18590
C          3.48210       -1.27970       -0.47310
C          3.91830        1.20290       -0.43930
C          2.49460        3.14920        0.12760
C          4.32520       -0.21000       -0.13260
C          3.89140       -2.62260       -0.50150
C          4.68950        1.98510       -1.32380
C          3.34520        3.89880       -0.70420
C          1.44360        3.92400        0.96130
C          5.58900       -0.49590        0.43180
C          5.17610       -2.84860        0.01320
C          3.06550       -3.77030       -1.13160
C          4.38680        3.35630       -1.45230
C          5.81530        1.40390       -2.14860
H          3.18280        4.96800       -0.78310
C          0.71540        4.96730        0.07890
C          0.35040        3.05910        1.62040
C          2.20440        4.66400        2.09120
C          6.00050       -1.83930        0.51770
C          6.49670        0.58890        0.96600
H          5.55920       -3.86130        0.04140
C          2.71950       -3.40480       -2.59710
C          3.87060       -5.08770       -1.16710
C          1.76340       -4.05710       -0.34860
C          5.19220        4.24790       -2.36910
H          6.79280        1.78650       -1.82730
H          5.84800        0.31540       -2.09510
H          5.69960        1.68670       -3.20140
H          0.21180        4.48450       -0.76490
H         -0.04520        5.48300        0.67580
H          1.38560        5.73420       -0.31880
H         -0.19820        2.46280        0.88220
H          0.75700        2.38590        2.37750
H         -0.37110        3.72150        2.11260
H          2.71540        3.95290        2.75040
H          2.95660        5.34940        1.68640
H          1.50340        5.24920        2.69890
C          7.33950       -2.20460        1.11700
H          6.81860        0.34810        1.98600
H          7.40980        0.68670        0.36460
H          6.00630        1.56290        0.99060
H          2.15560       -4.22350       -3.06040
H          2.11260       -2.49810       -2.65950
H          3.63140       -3.24950       -3.18560
H          4.10190       -5.45870       -0.16230
H          3.27270       -5.85530       -1.67010
H          4.80920       -4.98300       -1.72210
H          1.97510       -4.26910        0.70540
H          1.06200       -3.22390       -0.39220
H          1.26780       -4.93640       -0.77810
H          4.86350        5.28830       -2.29070
H          5.09160        3.94490       -3.41940
H          6.26300        4.21400       -2.13320
H          7.39590       -1.93180        2.17890
H          8.16640       -1.68680        0.61520
H          7.52190       -3.28040        1.04060
Ir        -0.89450       -0.08810       -0.68920
H         -0.11290        0.58490       -1.89500
H         -0.49350       -1.37790       -1.44820
C         -2.98130       -0.56170       -1.66250
H         -3.60180       -0.41380       -0.77950
C         -2.56120        0.59150       -2.33030
C         -3.16410       -1.89700       -2.32580
C         -2.58160       -3.08520       -1.85830
C         -4.04890       -1.97530       -3.41550
C         -2.85960       -4.30920       -2.47170
H         -1.89870       -3.05380       -1.01630
C         -4.33040       -3.19810       -4.02690
H         -4.52900       -1.07240       -3.78220
C         -3.73380       -4.37060       -3.55870
H         -2.39000       -5.21440       -2.09690
H         -5.01650       -3.23170       -4.86870
H         -3.94930       -5.32290       -4.03490
C         -2.99550        1.93700       -1.84860
C         -2.19810        3.08130       -2.04430
C         -4.26680        2.11590       -1.27040
C         -2.65050        4.34210       -1.66300
H         -1.21510        2.98500       -2.49480
C         -4.71350        3.38080       -0.89670
H         -4.92990        1.26520       -1.14930
C         -3.91380        4.51820       -1.07920
H         -2.01390        5.20730       -1.82780
H         -5.70820        3.48800       -0.47120
C         -4.39240        5.88450       -0.65260
H         -4.12110        6.08560        0.39240
H         -3.94340        6.67460       -1.26280
H         -5.48150        5.96790       -0.72670
C         -2.00640        0.53050       -3.74010
H         -1.57240       -0.44560       -3.96250
H         -2.82350        0.71730       -4.44920
H         -1.25010        1.29900       -3.91170
C         -3.53920       -0.92940        1.91520
C         -4.40410       -2.04830        1.99720
C         -3.99670        0.38090        2.18590
C         -5.74150       -1.82010        2.34840
C         -5.34290        0.54870        2.53680
C         -6.21050       -0.53720        2.61570
H         -6.41670       -2.66840        2.41630
H         -5.70660        1.54980        2.75070
H         -7.25090       -0.38370        2.88770
C         -3.95950       -3.46940        1.72810
H         -3.09240       -3.75070        2.33460
H         -4.77250       -4.16450        1.95470
H         -3.67900       -3.61660        0.67940
C         -3.10810        1.59890        2.14210
H         -2.43010        1.63850        3.00300
H         -2.49590        1.62810        1.23700
H         -3.71000        2.51080        2.16170
129
22_Intermediate_C 
S         -1.96930        0.54810        1.61080
C         -3.44310       -0.44780        1.96410
C         -4.54930        0.26840        2.49630
C         -3.52460       -1.83030        1.68940
C         -5.73180       -0.43580        2.74600
C         -4.73410       -2.48570        1.96920
C         -5.82680       -1.80250        2.48830
H         -6.58500        0.09870        3.15370
H         -4.80590       -3.55160        1.76910
H         -6.75270       -2.33190        2.69480
C         -4.50980        1.74730        2.81470
H         -3.76090        1.97880        3.57950
H         -4.26470        2.35280        1.93620
H         -5.48330        2.07400        3.19100
C         -2.41210       -2.66230        1.09990
H         -1.45840       -2.14230        1.06640
H         -2.28220       -3.58520        1.67630
H         -2.66390       -2.95480        0.07330
C          0.23610       -0.94160        2.85260
C         -0.70990        0.26100        2.96730
C         -1.39360        0.25690        4.35740
H         -2.33650       -0.29610        4.30520
H         -1.64150        1.29290        4.60960
C          1.40620       -0.78600        3.85270
H          2.19060       -0.20080        3.36400
H          1.81750       -1.78400        4.03710
C          0.98050       -0.11240        5.17780
H          1.60170       -0.48570        5.99850
H          1.15810        0.96930        5.12150
C         -0.50350       -0.36260        5.46130
H         -0.79360        0.05670        6.43050
H         -0.68410       -1.44320        5.52410
O          0.80350       -1.19640        1.53790
H         -0.32300       -1.85660        3.06130
H         -0.11450        1.17250        2.85860
P          1.04390       -0.22820        0.27830
O          2.11560        0.84150        0.91310
O          1.92030       -1.16730       -0.71660
C          3.01430        1.51890        0.06110
C          3.18240       -1.66230       -0.30390
C          4.00440        0.71150       -0.53670
C          2.94410        2.90680       -0.12050
C          4.19170       -0.70890       -0.08960
C          3.38530       -3.04800       -0.19450
C          4.84900        1.26680       -1.51870
C          3.85250        3.42250       -1.06290
C          2.05780        3.92770        0.63310
C          5.41210       -1.12510        0.48770
C          4.63300       -3.41420        0.33170
C          2.38380       -4.11800       -0.69120
C          4.75480        2.64870       -1.78700
C          5.83610        0.43350       -2.30390
H          3.84700        4.49100       -1.25340
C          1.24790        4.76560       -0.38400
C          1.06020        3.31730        1.63430
C          2.98950        4.87010        1.43910
C          5.61500       -2.49870        0.71770
C          6.49190       -0.14430        0.88500
H          4.85800       -4.46540        0.46300
C          2.03330       -3.84500       -2.17560
C          2.99240       -5.53560       -0.62090
C          1.09040       -4.13370        0.15320
C          5.63680        3.30280       -2.82530
H          6.87300        0.68960       -2.05040
H          5.70400       -0.63550       -2.13340
H          5.72150        0.62040       -3.37790
H          0.58910        4.12580       -0.97940
H          0.62200        5.49350        0.14550
H          1.89060        5.32120       -1.07310
H          0.35510        2.63840        1.14490
H          1.56780        2.76710        2.43170
H          0.48240        4.12660        2.09500
H          3.57180        4.30720        2.17750
H          3.69170        5.40560        0.79300
H          2.39140        5.61690        1.97500
C          6.89760       -2.99980        1.34110
H          6.79130       -0.30850        1.92690
H          7.39690       -0.26940        0.27640
H          6.16520        0.89180        0.78970
H          1.35000       -4.62030       -2.54290
H          1.54820       -2.87520       -2.30870
H          2.93470       -3.86840       -2.79910
H          3.20820       -5.84460        0.40800
H          2.27260       -6.25090       -1.03300
H          3.91400       -5.61790       -1.20750
H          1.31530       -4.29130        1.21430
H          0.53060       -3.20400        0.06000
H          0.44340       -4.95400       -0.18120
H          5.47310        4.38400       -2.85140
H          5.43660        2.91090       -3.83090
H          6.70110        3.12750       -2.62520
H          7.02960       -2.61420        2.36040
H          7.77930       -2.68410        0.76940
H          6.90620       -4.09230        1.39510
Ir        -0.86860        0.42700       -0.71680
H         -0.07080        0.47240       -2.09070
H         -1.02940       -1.09090       -0.96000
C         -2.61720        0.33910       -2.56960
C         -2.98990        1.16120       -1.50640
C         -3.09070       -1.08190       -2.60210
C         -2.30870       -2.09610       -3.18740
C         -4.35800       -1.43470       -2.11120
C         -2.76540       -3.40880       -3.24630
H         -1.31900       -1.86500       -3.56900
C         -4.81470       -2.75130       -2.18310
H         -5.00960       -0.67530       -1.69040
C         -4.02890       -3.76440       -2.74650
H         -2.12930       -4.17320       -3.68590
H         -5.80280       -2.99080       -1.79840
C         -2.08840        0.85070       -3.89120
H         -1.27790        0.22800       -4.27570
H         -2.91110        0.79010       -4.61690
H         -1.74520        1.88180       -3.85110
H         -3.64070        0.69110       -0.77300
C         -3.05470        2.64860       -1.45340
C         -2.06870        3.52990       -1.93580
C         -4.21030        3.20640       -0.87070
C         -2.24830        4.91270       -1.86110
H         -1.14890        3.14200       -2.35940
C         -4.39120        4.58650       -0.80250
H         -4.98360        2.54490       -0.48880
C         -3.40970        5.44740       -1.30140
H         -1.47290        5.57160       -2.24080
H         -5.29850        4.98860       -0.36080
H         -3.54720        6.52350       -1.24960
C         -4.52840       -5.18590       -2.84170
H         -4.88550       -5.41010       -3.85550
H         -3.73270       -5.90430       -2.61570
H         -5.35940       -5.36570       -2.15280
129
22_Intermediate_D
S          1.95930        0.48780        1.55360
C         -0.46510        0.79130        2.90180
C          0.78580       -0.09560        2.88740
C          1.45500       -0.03890        4.28440
H          2.15340        0.80380        4.32210
H          2.05060       -0.94670        4.41500
C         -1.53820        0.19450        3.83710
H         -2.15260       -0.49950        3.25680
H         -2.19300        1.01200        4.15690
C         -0.92300       -0.52660        5.05770
H         -1.61880       -0.48170        5.90200
H         -0.78060       -1.59100        4.83080
C          0.42570        0.09590        5.43550
H          0.83270       -0.37370        6.33710
H          0.27680        1.15570        5.67820
O         -1.06230        1.06510        1.60380
H         -0.17180        1.78820        3.24130
H          0.49910       -1.12100        2.64380
P         -1.10650        0.19100        0.25490
O         -2.08780       -1.04150        0.72000
O         -2.01700        1.12640       -0.71140
C         -3.06540       -1.61050       -0.12360
C         -3.26420        1.59600       -0.23350
C         -4.08730       -0.76020       -0.58500
C         -3.02920       -2.99010       -0.39480
C         -4.25730        0.62570       -0.03220
C         -3.45550        2.97090       -0.02360
C         -4.99820       -1.25010       -1.54960
C         -3.99760       -3.44100       -1.30220
C         -2.05130       -3.97890        0.27780
C         -5.44940        1.00160        0.62750
C         -4.67990        3.30090        0.57550
C         -2.46400        4.06790       -0.48130
C         -4.93590       -2.60780       -1.91410
C         -6.02230       -0.36010       -2.21790
H         -4.02130       -4.49130       -1.56500
C         -0.60450       -3.70120       -0.17880
C         -2.15790       -3.86650        1.81870
C         -2.36980       -5.44400       -0.09110
C         -5.64280        2.35870        0.94720
C         -6.50550       -0.00620        1.02070
H         -4.89860        4.34080        0.78460
C         -2.17870        3.90210       -1.99510
C         -3.05640        5.47990       -0.28090
C         -1.13500        4.01930        0.30760
C         -5.88910       -3.18480       -2.93550
H         -7.04540       -0.62170       -1.91820
H         -5.86660        0.69480       -1.99000
H         -5.97550       -0.48000       -3.30650
H         -0.28870       -2.68940        0.08470
H          0.08810       -4.40540        0.29760
H         -0.50750       -3.81360       -1.26350
H         -1.89510       -2.86970        2.17880
H         -3.17690       -4.09280        2.15340
H         -1.48120       -4.58930        2.29020
H         -3.38620       -5.73060        0.20060
H         -2.24930       -5.63750       -1.16250
H         -1.67430       -6.10290        0.44020
C         -6.89560        2.81740        1.65800
H         -6.75420        0.09840        2.08350
H         -7.43950        0.14650        0.46470
H         -6.17950       -1.03330        0.85210
H         -1.49640        4.69180       -2.33260
H         -1.71940        2.93680       -2.22100
H         -3.10430        3.98700       -2.57650
H         -3.22520        5.71180        0.77670
H         -2.34850        6.21990       -0.66920
H         -4.00140        5.61140       -0.81920
H         -1.31490        4.08920        1.38620
H         -0.57260        3.10490        0.11900
H         -0.50490        4.86760        0.01350
H         -5.74330       -4.26390       -3.04030
H         -5.74550       -2.73160       -3.92490
H         -6.93670       -3.01180       -2.65970
H         -6.97490        2.37950        2.66150
H         -7.80320        2.52530        1.11520
H         -6.90650        3.90560        1.76900
Ir         0.90640       -0.13480       -0.70490
H          0.13900       -0.41560       -2.06970
H          0.75060        1.36880       -1.04520
C          2.66930        0.40190       -2.49340
C          3.04190       -0.62140       -1.62350
C          3.14400        1.79800       -2.24070
C          2.36300        2.91080       -2.60940
C          4.42660        2.04210       -1.72450
C          2.83460        4.20700       -2.43530
H          1.36720        2.76350       -3.01620
C          4.90020        3.34620       -1.56720
H          5.07920        1.21180       -1.47330
C          4.11520        4.45250       -1.91250
H          2.20040        5.04510       -2.71400
H          5.90320        3.50210       -1.17810
C          2.11310        0.17920       -3.88190
H          1.24270        0.81010       -4.07800
H          2.88990        0.47360       -4.60000
H          1.84070       -0.85600       -4.07410
H          3.68970       -0.31750       -0.80480
C          3.10620       -2.08690       -1.88390
C          2.11940       -2.84280       -2.54540
C          4.26000       -2.75760       -1.43100
C          2.29930       -4.20880       -2.77160
H          1.19420       -2.37510       -2.86100
C          4.44020       -4.11980       -1.66300
H          5.02730       -2.19860       -0.90270
C          3.46040       -4.85220       -2.33920
H          1.52350       -4.77050       -3.28400
H          5.34570       -4.60910       -1.31540
H          3.59750       -5.91440       -2.52010
C          4.62620        5.86370       -1.75140
H          4.75490        6.35020       -2.72650
H          3.92150        6.47800       -1.17860
H          5.59150        5.88430       -1.23710
C          3.54100       -0.29520        1.96160
C          4.62690        0.58680        2.18440
C          3.70110       -1.69740        2.02290
C          5.88250        0.02780        2.45410
C          4.97880       -2.20150        2.30470
C          6.06110       -1.35230        2.51480
H          6.72560        0.69100        2.62540
H          5.11600       -3.27820        2.35580
H          7.04320       -1.76520        2.72730
C          4.48910        2.09330        2.15660
H          4.16640        2.46010        1.17670
H          3.75550        2.44650        2.88960
H          5.45000        2.56120        2.38890
C          2.57020       -2.68090        1.84260
H          1.80450       -2.31930        1.15230
H          2.94730       -3.63190        1.45720
H          2.07580       -2.89130        2.80020
129
22_Intermediate_E
S         -1.94890        0.53550        1.84310
C         -3.36730       -0.44620        2.40250
C         -4.34300        0.24290        3.16830
C         -3.52970       -1.80580        2.05310
C         -5.46040       -0.47570        3.61170
C         -4.66690       -2.47550        2.52770
C         -5.62090       -1.82400        3.30280
H         -6.21200        0.03720        4.20490
H         -4.79950       -3.52330        2.27290
H         -6.49320       -2.36400        3.66000
C         -4.25070        1.71330        3.51400
H         -3.36230        1.94580        4.10870
H         -4.20450        2.33980        2.61660
H         -5.12870        2.01710        4.09060
C         -2.58650       -2.56140        1.15060
H         -1.53850       -2.32230        1.32660
H         -2.72110       -3.63950        1.27770
H         -2.79380       -2.32380        0.09970
C          0.30060       -1.04270        2.84960
C         -0.54480        0.22280        3.05060
C         -1.04210        0.29830        4.51630
H         -2.01880       -0.18600        4.60230
H         -1.18150        1.35520        4.76470
C          1.58150       -0.99090        3.71690
H          2.37130       -0.52040        3.12590
H          1.89320       -2.02400        3.90470
C          1.38290       -0.23300        5.04690
H          2.07620       -0.62190        5.80000
H          1.63020        0.82860        4.91570
C         -0.06650       -0.35750        5.52300
H         -0.20060        0.11060        6.50400
H         -0.31660       -1.41880        5.64910
O          0.69650       -1.32300        1.47730
H         -0.30150       -1.91460        3.11530
H          0.08250        1.09270        2.83630
P          0.93130       -0.30320        0.25520
O          2.08710        0.68320        0.87710
O          1.69680       -1.23310       -0.83350
C          3.07910        1.26840        0.06070
C          2.89140       -1.89810       -0.46170
C          3.98750        0.36980       -0.53900
C          3.17490        2.66180       -0.07650
C          3.99530       -1.08400       -0.16360
C          2.93270       -3.30160       -0.45930
C          4.92460        0.85540       -1.47440
C          4.17980        3.09610       -0.95960
C          2.40490        3.76190        0.69700
C          5.14500       -1.67950        0.40260
C          4.11770       -3.84740        0.05550
C          1.82950       -4.20350       -1.06140
C          5.01180        2.24710       -1.68270
C          5.82410       -0.06020       -2.27400
H          4.31570        4.16290       -1.10130
C          1.87880        4.83730       -0.28360
C          1.19650        3.27530        1.51700
C          3.40110        4.42070        1.68610
C          5.18540       -3.08080        0.52970
C          6.31740       -0.86000        0.89260
H          4.21850       -4.92450        0.10860
C          1.59270       -3.79630       -2.53750
C          2.24880       -5.68940       -1.05700
C          0.50250       -4.10200       -0.27760
C          6.00870        2.82940       -2.65810
H          6.87490        0.03880       -1.97220
H          5.54450       -1.10920       -2.17280
H          5.77920        0.19930       -3.33800
H          1.19520        4.39980       -1.01800
H          1.32820        5.60330        0.27430
H          2.67990        5.34540       -0.82740
H          0.44250        2.79350        0.88420
H          1.49340        2.57960        2.30450
H          0.72260        4.14070        1.99430
H          3.78040        3.68770        2.40740
H          4.25980        4.85690        1.16570
H          2.90190        5.22170        2.24480
C          6.38690       -3.77180        1.13260
H          6.57130       -1.13730        1.92260
H          7.21750       -1.03830        0.29020
H          6.10950        0.21070        0.87550
H          0.82850       -4.44420       -2.98360
H          1.25240       -2.76160       -2.62470
H          2.51240       -3.90730       -3.12360
H          2.37920       -6.07970       -0.04130
H          1.46130       -6.28080       -1.53660
H          3.17610       -5.85960       -1.61500
H          0.65090       -4.33000        0.78380
H          0.05890       -3.10990       -0.35310
H         -0.21760       -4.82340       -0.68250
H          5.98580        3.92280       -2.63410
H          5.79800        2.51440       -3.68830
H          7.03350        2.50880       -2.43420
H          6.53350       -3.48740        2.18270
H          7.31340       -3.51350        0.60480
H          6.27210       -4.85900        1.09580
Ir        -0.96660        0.50530       -0.61860
H         -0.19640        0.56220       -1.99860
H         -1.22650       -0.97630       -0.98850
C         -3.38500        0.66540       -1.62450
C         -2.47770        1.56590       -2.17930
C         -3.67890       -0.60740       -2.35860
C         -4.93900       -1.21990       -2.23180
C         -2.76560       -1.20530       -3.25380
C         -5.27240       -2.35750       -2.96890
H         -5.69320       -0.79850       -1.57770
C         -3.10060       -2.34280       -3.97790
H         -1.76810       -0.79560       -3.36970
C         -4.36310       -2.94600       -3.85330
H         -6.26320       -2.78940       -2.85180
H         -2.36530       -2.77450       -4.65280
C         -2.25820        3.01740       -1.96560
C         -1.25080        3.60450       -2.76640
C         -3.00070        3.87480       -1.12500
C         -0.99460        4.97210       -2.73270
H         -0.67340        2.96940       -3.43310
C         -2.73750        5.24420       -1.08920
H         -3.81390        3.49880       -0.52200
C         -1.73660        5.80130       -1.88750
H         -0.22070        5.39030       -3.36960
H         -3.33310        5.88050       -0.44070
H         -1.54460        6.86990       -1.85950
C         -4.71050       -4.19310       -4.62920
H         -4.27370       -5.08420       -4.15910
H         -5.79320       -4.34490       -4.67830
H         -4.32320       -4.14740       -5.65300
C         -4.34810        1.03780       -0.51940
H         -3.90660        1.72210        0.20230
H         -5.23160        1.53020       -0.94850
H         -4.68920        0.15840        0.02640
H         -2.04350        1.24690       -3.12020
129
22_Intermediate_F
S          2.04150       -0.17630        1.79960
C         -0.37100       -0.92870        2.99030
C          0.97520       -1.52120        2.55670
C          1.66280       -2.15760        3.79240
H          2.27550       -1.40630        4.30050
H          2.34740       -2.93440        3.44100
C         -1.34870       -2.04230        3.42360
H         -1.89850       -2.38090        2.54160
H         -2.07990       -1.59520        4.10550
C         -0.62600       -3.23040        4.09740
H         -1.30130       -3.71880        4.80750
H         -0.36650       -3.98670        3.34530
C          0.65010       -2.75620        4.80040
H          1.12850       -3.58000        5.34040
H          0.38620       -2.00300        5.55360
O         -1.02380       -0.07630        2.00770
H         -0.18690       -0.23740        3.81660
H          0.80840       -2.27440        1.78230
P         -0.99190       -0.14450        0.40300
O         -1.77080       -1.56680        0.13560
O         -2.05300        1.01500        0.00000
C         -2.68280       -1.76160       -0.92370
C         -3.34200        1.00440        0.58360
C         -3.82330       -0.93720       -0.94900
C         -2.46590       -2.80460       -1.84300
C         -4.17890       -0.05930        0.21640
C         -3.72560        2.04660        1.44240
C         -4.67610       -0.98700       -2.07590
C         -3.37840       -2.85440       -2.90600
C         -1.37000       -3.88360       -1.68980
C         -5.39860       -0.23330        0.90920
C         -4.97090        1.85890        2.05950
C         -2.91600        3.35050        1.64390
C         -4.43130       -1.95230       -3.07000
C         -5.82870       -0.02480       -2.25980
H         -3.26440       -3.62360       -3.65970
C          0.03690       -3.26730       -1.83080
C         -1.50970       -4.57930       -0.31330
C         -1.49220       -4.98280       -2.76720
C         -5.77870        0.73650        1.85610
C         -6.28990       -1.43340        0.68410
H         -5.33330        2.61140        2.74930
C         -2.64660        4.00460        0.26530
C         -3.70370        4.37530        2.48900
C         -1.57490        3.09910        2.37060
C         -5.31160       -2.04990       -4.29460
H         -6.79810       -0.53520       -2.18940
H         -5.82010        0.77980       -1.52400
H         -5.78730        0.43010       -3.25630
H          0.23670       -2.53890       -1.04280
H          0.80280       -4.04910       -1.76430
H          0.14800       -2.76820       -2.79890
H         -1.38160       -3.87880        0.51460
H         -2.49490       -5.04930       -0.21470
H         -0.75120       -5.36540       -0.21530
H         -2.46410       -5.48700       -2.73310
H         -1.34010       -4.59110       -3.77900
H         -0.72080       -5.74020       -2.59000
C         -7.06900        0.59910        2.63170
H         -6.52430       -1.91750        1.63960
H         -7.24970       -1.14750        0.23460
H         -5.82520       -2.17750        0.03620
H         -2.10170        4.94630        0.40220
H         -2.04840        3.36050       -0.38320
H         -3.58840        4.23230       -0.24770
H         -3.87840        4.02210        3.51150
H         -3.12230        5.30120        2.55740
H         -4.67100        4.62440        2.03890
H         -1.73640        2.60640        3.33600
H         -0.89630        2.47960        1.78460
H         -1.07710        4.05820        2.55880
H         -5.01870       -2.89760       -4.92100
H         -5.24960       -1.14360       -4.91090
H         -6.36820       -2.17720       -4.02860
H         -7.06340       -0.29240        3.27220
H         -7.93650        0.50260        1.96710
H         -7.23390        1.46880        3.27440
Ir         0.97470        0.34630       -0.53660
H          0.13270        0.68350       -1.83750
H          0.60560        1.78940       -0.10710
C          2.94540        1.95330       -1.32940
C          2.68000        0.94040       -2.24460
C          2.33030        3.30560       -1.51200
C          2.88110        4.42570       -0.86380
C          1.23070        3.54210       -2.36680
C          2.37120        5.70970       -1.06580
H          3.73350        4.31670       -0.20400
C          0.72280        4.81970       -2.55780
H          0.74060        2.71850       -2.87310
C          1.28400        5.93630       -1.91410
H          2.83430        6.54800       -0.55140
H         -0.12990        4.95560       -3.21880
C          3.41590       -0.30510       -2.56590
C          2.73450       -1.25320       -3.36030
C          4.76470       -0.56340       -2.24960
C          3.35320       -2.42750       -3.78190
H          1.70830       -1.05100       -3.65500
C          5.38550       -1.73580       -2.68140
H          5.35340        0.16280       -1.70500
C          4.68410       -2.67780       -3.43760
H          2.80060       -3.13950       -4.38810
H          6.42990       -1.90490       -2.43460
H          5.17540       -3.58690       -3.77220
C          0.72890        7.32090       -2.14070
H         -0.34690        7.35660       -1.93120
H          1.22390        8.06000       -1.50380
H          0.86130        7.63340       -3.18430
C          4.03900        1.84690       -0.29320
H          4.28030        0.81360       -0.05610
H          4.95280        2.33340       -0.66010
H          3.75350        2.35050        0.63310
H          1.98920        1.19960       -3.03890
C          3.72920       -0.81980        1.95490
C          4.59850       -0.09030        2.80230
C          4.16660       -1.96820        1.25780
C          5.92260       -0.53100        2.92290
C          5.50090       -2.36680        1.41980
C          6.37390       -1.65720        2.23940
H          6.60180        0.01900        3.56810
H          5.85100       -3.24840        0.89020
H          7.40480       -1.98230        2.34690
C          4.16590        1.12950        3.58700
H          3.82670        1.94300        2.93690
H          3.33700        0.90350        4.26660
H          5.00020        1.50580        4.18530
C          3.26940       -2.80480        0.37970
H          2.62490       -3.46360        0.97550
H          2.62060       -2.19500       -0.25360
H          3.86630       -3.44310       -0.27650
129
22_Intermediate_G
S         -1.96930        0.54810        1.61080
C         -3.44310       -0.44780        1.96410
C         -4.54930        0.26840        2.49630
C         -3.52460       -1.83030        1.68940
C         -5.73180       -0.43580        2.74600
C         -4.73410       -2.48570        1.96920
C         -5.82680       -1.80250        2.48830
H         -6.58500        0.09870        3.15370
H         -4.80590       -3.55160        1.76910
H         -6.75270       -2.33190        2.69480
C         -4.50980        1.74730        2.81470
H         -3.76090        1.97880        3.57950
H         -4.26470        2.35280        1.93620
H         -5.48330        2.07400        3.19100
C         -2.41210       -2.66230        1.09990
H         -1.45840       -2.14230        1.06640
H         -2.28220       -3.58520        1.67630
H         -2.66390       -2.95480        0.07330
C          0.23610       -0.94160        2.85260
C         -0.70990        0.26100        2.96730
C         -1.39360        0.25690        4.35740
H         -2.33650       -0.29610        4.30520
H         -1.64150        1.29290        4.60960
C          1.40620       -0.78600        3.85270
H          2.19060       -0.20080        3.36400
H          1.81750       -1.78400        4.03710
C          0.98050       -0.11240        5.17780
H          1.60170       -0.48570        5.99850
H          1.15810        0.96930        5.12150
C         -0.50350       -0.36260        5.46130
H         -0.79360        0.05670        6.43050
H         -0.68410       -1.44320        5.52410
O          0.80350       -1.19640        1.53790
H         -0.32300       -1.85660        3.06130
H         -0.11450        1.17250        2.85860
P          1.04390       -0.22820        0.27830
O          2.11560        0.84150        0.91310
O          1.92030       -1.16730       -0.71660
C          3.01430        1.51890        0.06110
C          3.18240       -1.66230       -0.30390
C          4.00440        0.71150       -0.53670
C          2.94410        2.90680       -0.12050
C          4.19170       -0.70890       -0.08960
C          3.38530       -3.04800       -0.19450
C          4.84900        1.26680       -1.51870
C          3.85250        3.42250       -1.06290
C          2.05780        3.92770        0.63310
C          5.41210       -1.12510        0.48770
C          4.63300       -3.41420        0.33170
C          2.38380       -4.11800       -0.69120
C          4.75480        2.64870       -1.78700
C          5.83610        0.43350       -2.30390
H          3.84700        4.49100       -1.25340
C          1.24790        4.76560       -0.38400
C          1.06020        3.31730        1.63430
C          2.98950        4.87010        1.43910
C          5.61500       -2.49870        0.71770
C          6.49190       -0.14430        0.88500
H          4.85800       -4.46540        0.46300
C          2.03330       -3.84500       -2.17560
C          2.99240       -5.53560       -0.62090
C          1.09040       -4.13370        0.15320
C          5.63680        3.30280       -2.82530
H          6.87300        0.68960       -2.05040
H          5.70400       -0.63550       -2.13340
H          5.72150        0.62040       -3.37790
H          0.58910        4.12580       -0.97940
H          0.62200        5.49350        0.14550
H          1.89060        5.32120       -1.07310
H          0.35510        2.63840        1.14490
H          1.56780        2.76710        2.43170
H          0.48240        4.12660        2.09500
H          3.57180        4.30720        2.17750
H          3.69170        5.40560        0.79300
H          2.39140        5.61690        1.97500
C          6.89760       -2.99980        1.34110
H          6.79130       -0.30850        1.92690
H          7.39690       -0.26940        0.27640
H          6.16520        0.89180        0.78970
H          1.35000       -4.62030       -2.54290
H          1.54820       -2.87520       -2.30870
H          2.93470       -3.86840       -2.79910
H          3.20820       -5.84460        0.40800
H          2.27260       -6.25090       -1.03300
H          3.91400       -5.61790       -1.20750
H          1.31530       -4.29130        1.21430
H          0.53060       -3.20400        0.06000
H          0.44340       -4.95400       -0.18120
H          5.47310        4.38400       -2.85140
H          5.43660        2.91090       -3.83090
H          6.70110        3.12750       -2.62520
H          7.02960       -2.61420        2.36040
H          7.77930       -2.68410        0.76940
H          6.90620       -4.09230        1.39510
Ir        -0.86860        0.42700       -0.71680
H         -0.07080        0.47240       -2.09070
H         -1.02940       -1.09090       -0.96000
C         -2.61720        0.33910       -2.56960
C         -2.98990        1.16120       -1.50640
C         -3.09070       -1.08190       -2.60210
C         -2.30870       -2.09610       -3.18740
C         -4.35800       -1.43470       -2.11120
C         -2.76540       -3.40880       -3.24630
H         -1.31900       -1.86500       -3.56900
C         -4.81470       -2.75130       -2.18310
H         -5.00960       -0.67530       -1.69040
C         -4.02890       -3.76440       -2.74650
H         -2.12930       -4.17320       -3.68590
H         -5.80280       -2.99080       -1.79840
C         -3.05470        2.64860       -1.45340
C         -2.06870        3.52990       -1.93580
C         -4.21030        3.20640       -0.87070
C         -2.24830        4.91270       -1.86110
H         -1.14890        3.14200       -2.35940
C         -4.39120        4.58650       -0.80250
H         -4.98360        2.54490       -0.48880
C         -3.40970        5.44740       -1.30140
H         -1.47290        5.57160       -2.24080
H         -5.29850        4.98860       -0.36080
H         -4.37900       -4.77440       -2.79460
C         -3.60460        6.97320       -1.22800
H         -4.64340        7.20570       -1.33680
H         -3.25590        7.33230       -0.28230
H         -3.05010        7.44190       -2.01400
C         -3.91160        0.49550       -0.46770
H         -4.90800        0.44620       -0.85470
H         -3.56000       -0.49370       -0.26090
H         -3.90730        1.07140        0.43400
H         -1.99860        0.72000       -3.35520
129
22_Intermediate_H
S         -2.17070       -1.43640        0.88670
C          0.18040       -2.66070        1.77530
C         -1.03220       -1.88470        2.30580
C         -1.75750       -2.76000        3.35900
H         -2.49030       -3.40180        2.85940
H         -2.32100       -2.10040        4.02450
C          1.23890       -2.83920        2.88490
H          1.90860       -1.97530        2.86360
H          1.84070       -3.71870        2.63200
C          0.60370       -2.99390        4.28490
H          1.26180       -3.58970        4.92580
H          0.51070       -2.01070        4.76420
C         -0.78200       -3.63980        4.18170
H         -1.20730       -3.81150        5.17600
H         -0.68530       -4.62680        3.71180
O          0.81660       -2.10110        0.59330
H         -0.16760       -3.63290        1.41670
H         -0.69180       -0.94900        2.75500
P          0.97060       -0.57290        0.12090
O          1.96900        0.01050        1.28030
O          1.91110       -0.73080       -1.19560
C          2.95540        0.97680        0.99830
C          3.12450       -1.45090       -1.08180
C          4.00680        0.55920        0.15430
C          2.90130        2.24440        1.59330
C          4.12280       -0.87390       -0.28010
C          3.28330       -2.65590       -1.78520
C          4.97200        1.50180       -0.25750
C          3.93390        3.11880        1.21170
C          1.90280        2.75190        2.66140
C          5.26780       -1.64040        0.03270
C          4.46490       -3.35030       -1.48750
C          2.30530       -3.16420       -2.87190
C          4.92710        2.80090        0.29010
C          6.03920        1.17840       -1.27840
H          3.95750        4.11230        1.64740
C          1.31400        4.11480        2.22230
C          0.71030        1.81920        2.94640
C          2.67710        2.93650        3.99150
C          5.41940       -2.90350       -0.57000
C          6.31690       -1.15940        1.00950
H          4.65490       -4.29780       -1.97690
C          2.09590       -2.05670       -3.93530
C          2.87390       -4.39770       -3.60730
C          0.93940       -3.58120       -2.27920
C          5.95090        3.84350       -0.09630
H          7.04070        1.16810       -0.82920
H          5.87670        0.21200       -1.75620
H          6.05660        1.94360       -2.06310
H          0.76290        4.01890        1.28080
H          0.61910        4.47950        2.98820
H          2.08090        4.88260        2.08640
H          0.13950        1.60420        2.03620
H          1.02190        0.86840        3.38600
H          0.03860        2.31510        3.65640
H          3.10020        1.98510        4.33370
H          3.49840        3.65320        3.88870
H          2.00130        3.30880        4.77110
C          6.62140       -3.76850       -0.26700
H          6.50040       -1.92140        1.77640
H          7.27950       -0.97650        0.51480
H          6.02010       -0.23970        1.51520
H          1.42600       -2.42210       -4.72310
H          1.65470       -1.15450       -3.50530
H          3.04810       -1.78310       -4.40460
H          2.98180       -5.26320       -2.94400
H          2.18220       -4.68380       -4.40710
H          3.84630       -4.19160       -4.06800
H          1.06390       -4.34080       -1.49930
H          0.40000       -2.73940       -1.84480
H          0.31410       -4.00990       -3.07200
H          5.80370        4.76570        0.47330
H          5.88870        4.09680       -1.16260
H          6.97510        3.49500        0.08490
H          6.65810       -4.05450        0.79220
H          7.56310       -3.24920       -0.48490
H          6.60140       -4.68820       -0.85890
Ir        -0.95890        0.41120       -0.49120
H         -0.09680        1.41640       -1.36380
C         -2.67440        0.94380       -2.16360
C         -2.85480        1.93840       -1.20780
C         -3.57280       -0.17730       -2.54640
C         -3.02090       -1.27110       -3.24380
C         -4.97080       -0.13390       -2.39130
C         -3.82510       -2.29770       -3.73200
H         -1.94770       -1.31010       -3.41040
C         -5.77810       -1.15900       -2.88860
H         -5.44440        0.71740       -1.91870
C         -5.21110       -2.24790       -3.55220
H         -3.37200       -3.13070       -4.26180
H         -6.85540       -1.09650       -2.76400
C         -2.14320        3.24530       -1.35430
C         -1.77620        3.73670       -2.62340
C         -1.88320        4.07060       -0.24430
C         -1.15530        4.97330       -2.76620
H         -2.00550        3.16180       -3.51500
C         -1.26090        5.30910       -0.39410
H         -2.14450        3.74180        0.75650
C         -0.88250        5.78670       -1.65520
H         -0.89270        5.32220       -3.76200
H         -1.06710        5.91460        0.48750
H         -5.84190       -3.04350       -3.93800
C         -0.23770        7.14090       -1.82270
H          0.18290        7.50330       -0.87960
H          0.56430        7.11090       -2.56830
H         -0.96870        7.88500       -2.16550
C         -3.98170        1.91180       -0.20020
H         -4.82160        2.50590       -0.58530
H         -4.33500        0.90270        0.00350
H         -3.69230        2.36950        0.74720
H         -1.92330        1.14890       -2.92140
C         -3.76550       -1.12460        1.68680
C         -4.82940       -1.97230        1.29590
C         -3.95380       -0.08710        2.62760
C         -6.08940       -1.75350        1.86900
C         -5.23240        0.08150        3.17530
C         -6.29270       -0.73990        2.80150
H         -6.91570       -2.39600        1.57840
H         -5.39110        0.87470        3.90080
H         -7.27700       -0.58830        3.23520
C         -2.85130        0.84000        3.07870
H         -2.20280        0.36740        3.82660
H         -2.21130        1.15920        2.25000
H         -3.27320        1.73570        3.54370
C         -4.66550       -3.09920        0.30040
H         -4.34270       -2.73700       -0.68070
H         -3.92060       -3.82970        0.63490
H         -5.61640       -3.62280        0.16750
H         -0.77910       -0.55260       -1.69170
129
22_Intermediate_I
S         -2.15830       -0.22450        1.42710
C         -3.28630       -1.63040        1.62770
C         -4.57300       -1.31790        2.13660
C         -2.94900       -2.94640        1.23360
C         -5.50470       -2.35710        2.26000
C         -3.91950       -3.94650        1.38470
C         -5.18380       -3.66050        1.89220
H         -6.49270       -2.13230        2.65140
H         -3.67170       -4.96320        1.09320
H         -5.91930       -4.45290        1.99790
C         -4.99000        0.07700        2.54950
H         -4.38860        0.45290        3.38380
H         -4.88380        0.79610        1.73110
H         -6.03630        0.07540        2.86750
C         -1.61770       -3.33420        0.63940
H         -0.77120       -2.95770        1.21150
H         -1.53080       -4.42310        0.58800
H         -1.50480       -2.95400       -0.38330
C          0.27450       -1.14260        2.81530
C         -0.94510       -0.21000        2.85550
C         -1.68850       -0.39210        4.20280
H         -2.45700       -1.16440        4.09770
H         -2.20320        0.54740        4.42730
C          1.30760       -0.70650        3.88110
H          1.95760        0.05050        3.43350
H          1.93480       -1.57580        4.10590
C          0.64740       -0.15860        5.16750
H          1.29090       -0.36440        6.02900
H          0.55250        0.93310        5.10400
C         -0.74160       -0.77190        5.36630
H         -1.18520       -0.43920        6.31060
H         -0.65060       -1.86340        5.43430
O          0.96490       -1.26240        1.53910
H         -0.05620       -2.16470        3.01230
H         -0.58750        0.82120        2.77290
P          1.05920       -0.22530        0.31210
O          1.86980        1.01290        1.01800
O          2.13030       -0.94540       -0.67350
C          2.64590        1.89050        0.22930
C          3.46250       -1.18810       -0.25570
C          3.77740        1.31300       -0.38560
C          2.32820        3.25220        0.12180
C          4.24690       -0.05580        0.01480
C          3.95140       -2.50420       -0.20440
C          4.50410        2.05890       -1.33490
C          3.12210        3.96690       -0.79470
C          1.31110        4.07480        0.95230
C          5.52220       -0.23320        0.59720
C          5.24310       -2.62470        0.32840
C          3.20220       -3.73550       -0.76510
C          4.14770        3.40670       -1.55020
C          5.63700        1.46230       -2.13870
H          2.92190        5.02440       -0.93400
C          0.35890        4.85060        0.01170
C          0.43510        3.26650        1.92790
C          2.11910        5.08740        1.80670
C          6.00750       -1.54270        0.77140
C          6.36940        0.93350        1.05250
H          5.68200       -3.61070        0.41860
C          2.82670       -3.47790       -2.24600
C          4.08480       -5.00180       -0.73310
C          1.92820       -4.04610        0.04940
C          4.88800        4.25620       -2.55720
H          6.60390        1.90330       -1.86370
H          5.71280        0.38230       -2.00900
H          5.49350        1.66490       -3.20650
H         -0.22840        4.16070       -0.60330
H         -0.33990        5.45150        0.60550
H          0.89130        5.53190       -0.65870
H         -0.22800        2.57570        1.40020
H          1.03310        2.70100        2.64740
H         -0.19670        3.96430        2.48950
H          2.78630        4.56530        2.50210
H          2.72950        5.75390        1.19000
H          1.43290        5.70840        2.39470
C          7.36120       -1.79390        1.39530
H          6.70660        0.77960        2.08420
H          7.27450        1.03940        0.44020
H          5.82690        1.87900        1.01460
H          2.31330       -4.35600       -2.65620
H          2.16430       -2.61630       -2.35650
H          3.72440       -3.30040       -2.84970
H          4.34370       -5.30110        0.28870
H          3.53000       -5.83070       -1.18570
H          5.01210       -4.87420       -1.30230
H          2.16710       -4.20700        1.10690
H          1.20020       -3.23910       -0.01240
H          1.45800       -4.95930       -0.33510
H          4.51940        5.28600       -2.54690
H          4.76860        3.86930       -3.57740
H          5.96590        4.28200       -2.35450
H          7.39760       -1.44760        2.43640
H          8.16140       -1.26700        0.86070
H          7.60130       -2.86110        1.39180
Ir        -0.88220        0.07800       -0.76690
H         -0.04450        0.39140       -2.07790
C         -2.87390       -0.35710       -1.98890
H         -3.58650       -0.49860       -1.17990
C         -2.69560        0.96240       -2.39740
C         -2.60360       -1.62910       -2.71550
C         -3.56830       -2.64800       -2.57120
C         -1.46630       -1.90400       -3.50270
C         -3.42730       -3.87300       -3.21830
H         -4.44330       -2.46720       -1.95270
C         -1.32260       -3.13760       -4.14120
H         -0.67610       -1.16960       -3.59840
C         -2.30200       -4.12320       -4.00920
H         -4.19350       -4.63400       -3.10110
H         -0.43650       -3.32580       -4.74070
H         -2.18710       -5.07980       -4.51060
C         -3.42610        2.05840       -1.69220
C         -2.91920        3.37080       -1.68480
C         -4.68070        1.84430       -1.09210
C         -3.61350        4.40890       -1.06940
H         -1.96630        3.58620       -2.15650
C         -5.37620        2.88960       -0.48720
H         -5.14460        0.86390       -1.13000
C         -4.85330        4.18990       -0.45160
H         -3.18660        5.40870       -1.07440
H         -6.35240        2.69310       -0.05070
C         -5.59420        5.31200        0.23360
H         -5.29150        5.39540        1.28600
H         -5.38770        6.27690       -0.24070
H         -6.67600        5.14480        0.21900
C         -2.06740        1.35690       -3.71660
H         -1.68800        0.50190       -4.27270
H         -2.83750        1.84980       -4.32300
H         -1.25070        2.07200       -3.58990
H         -0.74590        1.60350       -0.52810
129
22_Intermediate_J
S         -1.79780       -1.37490        1.33850
C          0.50020       -1.17400        2.90990
C         -0.95000       -0.67290        2.84710
C         -1.66740       -1.09130        4.15520
H         -2.08400       -2.09750        4.04080
H         -2.51330       -0.41680        4.31310
C          1.28600       -0.39830        3.98650
H          1.69660        0.50650        3.52970
H          2.13510       -1.01840        4.29280
C          0.40200       -0.03450        5.20210
H          1.02020        0.02560        6.10370
H         -0.03670        0.96130        5.05930
C         -0.72300       -1.05990        5.38480
H         -1.31010       -0.83680        6.28170
H         -0.28350       -2.05300        5.54140
O          1.24200       -1.15170        1.65710
H          0.47920       -2.24150        3.14420
H         -0.95820        0.41400        2.74030
P          1.17240       -0.15070        0.40250
O          1.88140        1.17590        1.04230
O          2.27820       -0.78610       -0.60340
C          2.60290        2.07350        0.22860
C          3.61700       -0.94760       -0.17400
C          3.78460        1.56280       -0.35130
C          2.17720        3.39870        0.06920
C          4.33500        0.23200        0.07880
C          4.16440       -2.23670       -0.07790
C          4.46980        2.33860       -1.30830
C          2.92590        4.14590       -0.85840
C          1.04590        4.14070        0.82400
C          5.61270        0.13270        0.67380
C          5.45560       -2.27920        0.46780
C          3.47340       -3.51460       -0.61210
C          4.01260        3.64750       -1.57090
C          5.65970        1.81090       -2.07730
H          2.63550        5.17470       -1.04660
C         -0.01320        4.63140       -0.19130
C          0.31750        3.32350        1.90960
C          1.67060        5.36580        1.54340
C          6.16090       -1.14700        0.88480
C          6.39580        1.35100        1.10740
H          5.94180       -3.23920        0.59060
C          3.13070       -3.31850       -2.11050
C          4.40490       -4.74230       -0.51350
C          2.18670       -3.85720        0.17370
C          4.70420        4.52330       -2.59030
H          6.58570        2.32790       -1.79400
H          5.81190        0.74240       -1.92180
H          5.52340        1.97930       -3.15180
H         -0.47980        3.78250       -0.70270
H         -0.80040        5.19170        0.32720
H          0.41790        5.28850       -0.95330
H         -0.24090        2.48480        1.48860
H          1.00630        2.93460        2.66530
H         -0.40060        3.98050        2.41410
H          2.41960        5.04610        2.27710
H          2.15400        6.05920        0.84930
H          0.88880        5.91970        2.07620
C          7.51990       -1.31310        1.52590
H          6.71970        1.24540        2.14950
H          7.30640        1.48080        0.50830
H          5.81000        2.26780        1.02960
H          2.65340       -4.22380       -2.50440
H          2.44670       -2.48090       -2.26610
H          4.03850       -3.13360       -2.69650
H          4.65020       -4.99380        0.52450
H          3.89670       -5.60910       -0.94970
H          5.34020       -4.59590       -1.06450
H          2.39270       -3.95100        1.24580
H          1.41010       -3.10370        0.04390
H          1.78840       -4.81590       -0.18040
H          4.25950        5.52250       -2.61270
H          4.63040        4.10280       -3.60150
H          5.77350        4.63550       -2.37320
H          7.53010       -0.93460        2.55630
H          8.29810       -0.76370        0.98160
H          7.81180       -2.36690        1.55610
Ir        -0.78110       -0.13000       -0.70710
H          0.01470        0.55020       -1.89800
C         -2.59960       -0.88270       -2.03500
H         -3.30520       -1.12490       -1.24220
C         -2.60250        0.44410       -2.46340
C         -2.04870       -2.07490       -2.74290
C         -1.63270       -3.19260       -1.98740
C         -2.00070       -2.17620       -4.14730
C         -1.14790       -4.34500       -2.60620
H         -1.69380       -3.15540       -0.90390
C         -1.52850       -3.33350       -4.76400
H         -2.36980       -1.36600       -4.76440
C         -1.08870       -4.41770       -3.99880
H         -0.82880       -5.18710       -1.99910
H         -1.51320       -3.39140       -5.84860
H         -0.71970       -5.31590       -4.48520
C         -3.59900        1.40220       -1.90230
C         -3.30750        2.77290       -1.76770
C         -4.90050        0.97810       -1.58270
C         -4.26700        3.66970       -1.31010
H         -2.31470        3.14270       -2.00160
C         -5.86280        1.88460       -1.13870
H         -5.17910       -0.06270       -1.71420
C         -5.56760        3.24590       -0.99250
H         -4.00460        4.71920       -1.20180
H         -6.86340        1.52540       -0.91200
C         -6.61840        4.23330       -0.54520
H         -6.18880        5.01310        0.09280
H         -7.07450        4.73730       -1.40750
H         -7.42330        3.73990        0.00850
C         -1.86600        0.93890       -3.69100
H         -1.04800        0.28350       -3.98760
H         -2.58010        1.01690       -4.52240
H         -1.46090        1.93990       -3.52860
C         -3.57270       -1.26050        1.68770
C         -4.27920       -2.48800        1.73480
C         -4.22370       -0.02300        1.89250
C         -5.65710       -2.44390        1.98370
C         -5.60160       -0.04100        2.14920
C         -6.31530       -1.23480        2.19240
H         -6.21260       -3.37660        2.02180
H         -6.11400        0.90310        2.31080
H         -7.38350       -1.22370        2.38960
C         -3.62530       -3.83880        1.53930
H         -2.77890       -3.98770        2.21740
H         -4.35140       -4.63540        1.72260
H         -3.24550       -3.96830        0.52000
C         -3.51360        1.30720        1.87110
H         -2.97430        1.49220        2.80860
H         -2.79180        1.36850        1.05320
H         -4.23360        2.11930        1.74440
H         -1.03440        1.32030       -0.22690
129
22_Intermediate_K
S          2.15220       -0.48760        1.52160
C          3.43120        0.73280        1.93050
C          4.65260        0.20050        2.41880
C          3.26890        2.12010        1.70440
C          5.69630        1.09280        2.69780
C          4.34720        2.96430        2.00430
C          5.54820        2.46200        2.49670
H          6.63510        0.69960        3.07720
H          4.23420        4.03270        1.84360
H          6.36900        3.13740        2.72080
C          4.88890       -1.27700        2.64630
H          4.19690       -1.69590        3.38360
H          4.76500       -1.85500        1.72480
H          5.90600       -1.43980        3.01350
C          2.01640        2.74750        1.14200
H          1.11010        2.40330        1.63910
H          2.06180        3.83510        1.24750
H          1.90000        2.53540        0.07040
C         -0.18530        0.51360        3.01730
C          0.91100       -0.55610        2.92630
C          1.64020       -0.66110        4.28930
H          2.49320        0.02460        4.30420
H          2.03910       -1.67660        4.37600
C         -1.28770        0.05510        4.00080
H         -2.01080       -0.54450        3.44060
H         -1.81300        0.95120        4.34790
C         -0.72980       -0.75200        5.19530
H         -1.36470       -0.59810        6.07400
H         -0.76480       -1.82570        4.97060
C          0.71740       -0.34800        5.49180
H          1.09640       -0.86900        6.37730
H          0.75490        0.72410        5.72330
O         -0.82910        0.89600        1.77030
H          0.26180        1.44900        3.36200
H          0.43490       -1.51360        2.69240
P         -0.99680        0.09070        0.39000
O         -1.94400       -1.15660        0.87770
O         -1.97060        1.07000       -0.46860
C         -2.77750       -1.80740       -0.05890
C         -3.27770        1.36980       -0.00710
C         -3.83720       -1.02600       -0.56610
C         -2.58110       -3.15070       -0.41010
C         -4.17530        0.29280        0.06700
C         -3.63090        2.69830        0.28220
C         -4.61320       -1.52000       -1.63310
C         -3.41730       -3.61220       -1.44390
C         -1.64850       -4.19620        0.25130
C         -5.43210        0.49280        0.68090
C         -4.90790        2.85300        0.84110
C         -2.76070        3.92690       -0.07170
C         -4.37610       -2.83480       -2.08650
C         -5.67330       -0.68700       -2.31700
H         -3.30710       -4.64000       -1.77460
C         -0.71860       -4.82400       -0.81470
C         -0.76010       -3.66820        1.39310
C         -2.54360       -5.30790        0.86020
C         -5.78220        1.79260        1.09180
C         -6.39780       -0.64400        0.92750
H         -5.24440        3.84670        1.10990
C         -2.46860        3.91430       -1.59340
C         -3.48970        5.25060        0.24420
C         -1.43040        3.93930        0.71090
C         -5.17180       -3.41990       -3.23040
H         -6.68160       -1.07250       -2.11720
H         -5.64580        0.35700       -2.00310
H         -5.53750       -0.71560       -3.40430
H         -0.08040       -4.06130       -1.27390
H         -0.06930       -5.57350       -0.34730
H         -1.27580       -5.32000       -1.61480
H         -0.02970       -2.93840        1.03530
H         -1.34820       -3.21310        2.19520
H         -0.20240       -4.51030        1.81890
H         -3.20130       -4.89790        1.63510
H         -3.17130       -5.79400        0.10730
H         -1.91520       -6.07950        1.32070
C         -7.10780        2.06380        1.76570
H         -6.71760       -0.65180        1.97620
H         -7.30870       -0.53930        0.32370
H         -5.95790       -1.61660        0.70410
H         -1.86860        4.79160       -1.86420
H         -1.91610        3.02100       -1.89500
H         -3.40090        3.95310       -2.16860
H         -3.69130        5.36670        1.31500
H         -2.85260        6.08720       -0.06240
H         -4.43690        5.34080       -0.29870
H         -1.60640        3.89260        1.79160
H         -0.79090        3.10240        0.43540
H         -0.88550        4.86660        0.49580
H         -4.89390       -4.46320       -3.40640
H         -5.00340       -2.86770       -4.16390
H         -6.25080       -3.38690       -3.03510
H         -7.18790        1.53780        2.72590
H         -7.95370        1.72880        1.15250
H         -7.23660        3.13240        1.96030
Ir         0.94310       -0.26840       -0.72820
H          0.03240       -0.30320       -2.02810
C          2.36880       -0.05320       -2.61640
C          3.11120       -0.63610       -1.58110
C          2.36500        1.44300       -2.74200
C          1.24290        2.12890       -3.25230
C          3.50100        2.20740       -2.41380
C          1.25500        3.51250       -3.40490
H          0.34600        1.57730       -3.51490
C          3.50840        3.59070       -2.57900
H          4.40070        1.71700       -2.05600
C          2.38740        4.27190       -3.07450
H          0.36840        4.01120       -3.78810
H          4.40580        4.14970       -2.32620
C          1.94950       -0.80890       -3.86110
H          1.02630       -0.41190       -4.28720
H          2.74040       -0.67700       -4.61250
H          1.82010       -1.87530       -3.68910
H          3.65850        0.06520       -0.95480
C          3.67530       -2.01180       -1.50980
C          2.97720       -3.19820       -1.79310
C          5.02900       -2.11630       -1.13790
C          3.61550       -4.43700       -1.73160
H          1.92230       -3.16220       -2.03900
C          5.67000       -3.35450       -1.08150
H          5.58780       -1.21390       -0.90220
C          4.96530       -4.52200       -1.38130
H          3.05140       -5.33900       -1.95150
H          6.71810       -3.40440       -0.79980
H          5.45910       -5.48830       -1.33370
C          2.40720        5.76700       -3.27860
H          2.65400        6.01570       -4.31920
H          1.43020        6.21260       -3.06350
H          3.15450        6.24900       -2.64070
H          0.65240       -1.78870       -0.74910
129
22_Intermediate_L
S          2.08370        0.86350        1.37750
C         -0.15330        0.89990        3.04540
C          1.19550        0.18670        2.87530
C          2.02460        0.40410        4.16740
H          2.58570        1.34110        4.08860
H          2.76300       -0.39890        4.24070
C         -1.00240        0.19120        4.12010
H         -1.57440       -0.60620        3.63640
H         -1.72670        0.91680        4.50510
C         -0.13670       -0.38410        5.26450
H         -0.71660       -0.40300        6.19280
H          0.13010       -1.42550        5.04380
C          1.14460        0.43880        5.44330
H          1.72940        0.06790        6.29140
H          0.87620        1.47560        5.68210
O         -0.95680        1.06620        1.84180
H          0.04780        1.93450        3.33460
H          1.03080       -0.87950        2.70330
P         -1.05310        0.19980        0.49340
O         -1.90960       -1.09010        1.04980
O         -2.08940        1.06540       -0.40680
C         -2.63020       -1.88480        0.13120
C         -3.45050        1.22460       -0.05510
C         -3.68100       -1.24710       -0.55220
C         -2.34040       -3.25380       -0.00750
C         -4.22830        0.05660       -0.04390
C         -3.96620        2.51040        0.18100
C         -4.28890       -1.91120       -1.64020
C         -3.00380       -3.88410       -1.07110
C         -1.50960       -4.07170        1.01070
C         -5.55800        0.12760        0.43150
C         -5.30560        2.53250        0.59550
C         -3.19270        3.82540       -0.07680
C         -3.90700       -3.23740       -1.91900
C         -5.32140       -1.23810       -2.51540
H         -2.81020       -4.93280       -1.26060
C         -0.03480       -3.62780        1.08490
C         -2.16130       -3.91130        2.40790
C         -1.51270       -5.57740        0.67000
C         -6.08750        1.38780        0.76620
C         -6.41780       -1.10250        0.61790
H         -5.77130        3.48620        0.81040
C         -2.70660        3.84920       -1.54700
C         -4.09450        5.06290        0.12400
C         -1.98700        3.98670        0.87670
C         -4.50760       -3.99120       -3.08320
H         -6.30710       -1.71070       -2.41610
H         -5.43240       -0.17860       -2.28120
H         -5.03910       -1.32240       -3.57160
H          0.05850       -2.59380        1.41960
H          0.50630       -4.26050        1.79880
H          0.46000       -3.72440        0.11210
H         -2.16000       -2.86910        2.73890
H         -3.19850       -4.26490        2.39700
H         -1.60950       -4.50310        3.14820
H         -2.52540       -5.99400        0.64810
H         -1.03240       -5.78510       -0.29290
H         -0.95110       -6.11660        1.44040
C         -7.50200        1.52530        1.28180
H         -6.87230       -1.10120        1.61530
H         -7.24550       -1.13190       -0.10280
H         -5.84920       -2.02680        0.51080
H         -2.18600        4.79280       -1.75030
H         -2.01760        3.02920       -1.76100
H         -3.55430        3.77640       -2.23840
H         -4.44020        5.16010        1.15920
H         -3.51730        5.96290       -0.11370
H         -4.97060        5.04910       -0.53370
H         -2.30790        3.94460        1.92390
H         -1.23250        3.21570        0.72550
H         -1.51500        4.96230        0.70760
H         -4.14100       -5.02140       -3.11340
H         -4.25750       -3.51990       -4.04250
H         -5.60280       -4.02530       -3.02620
H         -7.63390        1.01370        2.24400
H         -8.23300        1.08790        0.59040
H         -7.76470        2.57720        1.42680
Ir         0.86380       -0.04940       -0.70530
H         -0.07930       -0.57090       -1.87180
C          2.14240        0.24000       -2.65690
C          2.93180       -0.49190       -1.76230
C          2.12180        1.73400       -2.56800
C          0.97560        2.45800       -2.95940
C          3.25550        2.47310       -2.16430
C          0.96140        3.85250       -2.92950
H          0.08650        1.92820       -3.28460
C          3.23600        3.86230       -2.15500
H          4.17180        1.95660       -1.89740
C          2.08850        4.58160       -2.53430
H          0.05980        4.37930       -3.22910
H          4.13240        4.40350       -1.86280
C          1.59950       -0.34230       -3.94670
H          0.60760        0.04200       -4.19130
H          2.27720       -0.03820       -4.75610
H          1.55510       -1.42910       -3.93250
H          3.57880        0.08280       -1.10500
C          3.36700       -1.90850       -1.90260
C          2.51160       -2.98670       -2.19320
C          4.73690       -2.17610       -1.72970
C          3.01560       -4.28020       -2.33010
H          1.44360       -2.81960       -2.28430
C          5.24160       -3.46930       -1.87200
H          5.41280       -1.36100       -1.48530
C          4.38240       -4.52740       -2.17550
H          2.33550       -5.09810       -2.55080
H          6.30500       -3.64860       -1.74060
H          4.77130       -5.53610       -2.28110
C          2.09240        6.09000       -2.54530
H          2.65090        6.47190       -3.40980
H          1.07690        6.49260       -2.60280
H          2.57430        6.49350       -1.64810
C          3.83680        0.48870        1.62680
C          4.69990        1.61100        1.68050
C          4.32960       -0.83210        1.73160
C          6.07340        1.37720        1.82400
C          5.71270       -1.00520        1.88260
C          6.57890        0.08350        1.92480
H          6.74850        2.22730        1.86500
H          6.10610       -2.01440        1.96600
H          7.64750       -0.07590        2.03810
C          4.20850        3.04050        1.60940
H          3.67400        3.24910        0.67710
H          3.52010        3.27200        2.42990
H          5.05420        3.73080        1.67500
C          3.44790       -2.05690        1.72460
H          2.65330       -1.98880        0.97850
H          4.03970       -2.94940        1.50590
H          2.97510       -2.21320        2.70260
H          0.87230       -1.54630       -0.32500
129
22_Intermediate_M
S         -2.07550        0.12600        1.76940
C         -3.57820       -0.88920        1.84770
C         -4.62220       -0.39830        2.67370
C         -3.73060       -2.07570        1.09430
C         -5.80530       -1.14530        2.75350
C         -4.93340       -2.78440        1.21840
C         -5.96020       -2.33110        2.04140
H         -6.61140       -0.78430        3.38580
H         -5.06060       -3.70140        0.65010
H         -6.88400       -2.89700        2.12100
C         -4.53180        0.88990        3.46340
H         -3.74180        0.85600        4.21980
H         -4.31840        1.75000        2.82050
H         -5.47790        1.07910        3.97770
C         -2.68700       -2.59990        0.13950
H         -1.71320       -2.73860        0.61060
H         -2.99990       -3.56370       -0.27130
H         -2.54430       -1.91330       -0.70330
C         -0.01340       -1.84270        2.51080
C         -0.83510       -0.62810        2.96540
C         -1.50700       -0.93970        4.32710
H         -2.50310       -1.36010        4.16140
H         -1.63900        0.00890        4.85680
C          1.16450       -2.08820        3.48370
H          2.01250       -1.48580        3.14700
H          1.45710       -3.13890        3.38530
C          0.81490       -1.75190        4.95040
H          1.39610       -2.38960        5.62450
H          1.10170       -0.71680        5.17680
C         -0.68630       -1.92130        5.19730
H         -0.93310       -1.75310        6.25090
H         -0.97830       -2.95520        4.97180
O          0.52880       -1.78610        1.16100
H         -0.66380       -2.71960        2.48070
H         -0.15480        0.21980        3.08440
P          0.88530       -0.50590        0.25850
O          2.05410        0.19730        1.16860
O          1.65600       -1.16880       -1.00800
C          3.04200        1.00060        0.55720
C          2.85260       -1.90300       -0.81830
C          3.93040        0.31820       -0.30190
C          3.14860        2.37040        0.83840
C          3.95670       -1.18320       -0.33560
C          2.90110       -3.25970       -1.17770
C          4.83320        1.05840       -1.09110
C          4.10180        3.05390        0.06070
C          2.43330        3.19060        1.94200
C          5.12060       -1.89270        0.03600
C          4.09740       -3.90850       -0.83930
C          1.79410       -3.98410       -1.97890
C          4.89760        2.45620       -0.91170
C          5.71730        0.41210       -2.13330
H          4.22340        4.12090        0.21750
C          1.68190        4.38600        1.30970
C          1.42350        2.40810        2.80080
C          3.52070        3.72580        2.91140
C          5.17070       -3.27900       -0.20360
C          6.29900       -1.21530        0.69820
H          4.20520       -4.96180       -1.06760
C          1.54700       -3.21890       -3.30370
C          2.21110       -5.42320       -2.35060
C          0.47370       -4.08280       -1.18450
C          5.84150        3.30450       -1.73250
H          6.77780        0.47060       -1.85630
H          5.47080       -0.63800       -2.29230
H          5.61590        0.93170       -3.09320
H          0.91050        4.04430        0.61120
H          1.19320        4.97530        2.09480
H          2.35200        5.05640        0.76280
H          0.56650        2.07430        2.21090
H          1.87930        1.53930        3.28440
H          1.04370        3.07150        3.58650
H          4.05590        2.89870        3.39200
H          4.25800        4.35460        2.40380
H          3.05180        4.32970        3.69740
C          6.38690       -4.09020        0.18060
H          6.57970       -1.74890        1.61390
H          7.18520       -1.21830        0.05040
H          6.08390       -0.18000        0.96620
H          0.77910       -3.73410       -3.89350
H          1.20810       -2.19540       -3.12480
H          2.46190       -3.17690       -3.90610
H          2.35090       -6.05460       -1.46590
H          1.41800       -5.87670       -2.95500
H          3.13220       -5.44800       -2.94290
H          0.63000       -4.57420       -0.21770
H          0.03670       -3.10260       -0.99930
H         -0.25340       -4.67570       -1.75260
H          5.80800        4.34950       -1.41120
H          5.58680        3.27560       -2.79980
H          6.87920        2.95900       -1.64720
H          6.55220       -4.08240        1.26580
H          7.30200       -3.69700       -0.27960
H          6.27610       -5.13280       -0.13110
Ir        -0.88000        0.67850       -0.46780
H          0.05460        1.02860       -1.70120
C         -3.04940        1.53040       -1.37120
C         -2.01370        2.28530       -1.92250
C         -3.57490        0.35170       -2.14070
C         -4.88680       -0.10950       -1.92530
C         -2.81970       -0.31790       -3.13180
C         -5.41480       -1.16980       -2.66130
H         -5.52510        0.37170       -1.19410
C         -3.34830       -1.38470       -3.85100
H         -1.79930       -0.01480       -3.34560
C         -4.65920       -1.83540       -3.63340
H         -6.43910       -1.48190       -2.47340
H         -2.73120       -1.87210       -4.60190
C         -1.56980        3.68310       -1.67930
C         -0.34320        4.06550       -2.26260
C         -2.32230        4.67690       -1.02590
C          0.12750        5.37190       -2.17360
H          0.24720        3.31820       -2.78640
C         -1.84970        5.98840       -0.93880
H         -3.29680        4.45440       -0.61400
C         -0.62380        6.34210       -1.50320
H          1.07780        5.63400       -2.63000
H         -2.45460        6.73770       -0.43580
H         -0.26250        7.36410       -1.43320
C         -5.22120       -3.00160       -4.40890
H         -4.85920       -3.95560       -4.00320
H         -6.31450       -3.02000       -4.36680
H         -4.91830       -2.96450       -5.46100
C         -3.91200        2.05300       -0.24090
H         -3.33880        2.67510        0.44600
H         -4.73730        2.65560       -0.64330
H         -4.35570        1.23870        0.33270
H         -1.63520        1.92390       -2.87230
H         -0.24240        1.94110        0.15980
129
22_Intermediate_N
S         -2.08990       -0.99490        1.54210
C          0.13380       -0.56030        3.17990
C         -1.27770       -0.01960        2.91900
C         -2.09060       -0.10760        4.23550
H         -2.57030       -1.08890        4.30740
H         -2.89510        0.63160        4.19110
C          0.90520        0.37380        4.13660
H          1.41010        1.13800        3.53960
H          1.68490       -0.22040        4.62500
C         -0.01990        1.03300        5.18480
H          0.54840        1.24760        6.09580
H         -0.38200        1.99900        4.80990
C         -1.21720        0.12840        5.49400
H         -1.83920        0.56130        6.28440
H         -0.85230       -0.83270        5.87790
O          0.94410       -0.80860        1.99570
H          0.04010       -1.55980        3.61210
H         -1.21200        1.01630        2.57920
P          0.96260       -0.06110        0.57380
O          1.60540        1.38220        1.00380
O          2.14930       -0.84920       -0.20750
C          2.30450        2.15270        0.05140
C          3.47330       -0.82970        0.29620
C          3.51490        1.59390       -0.41140
C          1.83340        3.40830       -0.35470
C          4.12000        0.41640        0.29850
C          4.08370       -2.02860        0.69990
C          4.17850        2.19530       -1.49840
C          2.55710        3.98880       -1.41270
C          0.68950        4.24830        0.26700
C          5.37730        0.52990        0.93370
C          5.35180       -1.86950        1.27730
C          3.49470       -3.43580        0.44090
C          3.66610        3.40360       -2.01750
C          5.40380        1.58190       -2.13700
H          2.22940        4.95020       -1.79540
C         -0.39740        4.52450       -0.79730
C          0.00150        3.62180        1.49510
C          1.29200        5.59790        0.74110
C          5.98270       -0.63410        1.44350
C          6.07790        1.85920        1.10150
H          5.88040       -2.74660        1.62940
C          3.25490       -3.60300       -1.08000
C          4.47370       -4.54810        0.87560
C          2.17180       -3.67380        1.20430
C          4.32800        4.08930       -3.19030
H          6.29630        2.20020       -1.97480
H          5.61390        0.58270       -1.75360
H          5.26990        1.50500       -3.22240
H         -0.86510        3.59140       -1.12820
H         -1.18200        5.16370       -0.37490
H          0.00680        5.03200       -1.67910
H         -0.53600        2.70640        1.23940
H          0.71290        3.39410        2.29410
H         -0.72980        4.33780        1.88790
H          2.06550        5.43540        1.50040
H          1.73870        6.16820       -0.07850
H          0.50420        6.21750        1.18550
C          7.32410       -0.57250        2.13790
H          6.39270        1.99620        2.14240
H          6.98710        1.91800        0.48900
H          5.43850        2.70060        0.83110
H          2.86830       -4.60800       -1.28760
H          2.53090       -2.87830       -1.46000
H          4.19160       -3.48060       -1.63630
H          4.66440       -4.53350        1.95470
H          4.03340       -5.52140        0.63320
H          5.43420       -4.48210        0.35320
H          2.30010       -3.50450        2.27930
H          1.37070       -3.02430        0.85330
H          1.85140       -4.71310        1.06130
H          3.83260        5.03750       -3.41910
H          4.29350        3.46800       -4.09440
H          5.38640        4.30130       -2.99420
H          7.27710        0.02380        3.05850
H          8.09140       -0.11150        1.50350
H          7.67020       -1.57420        2.40890
Ir        -0.91800       -0.20030       -0.65250
H         -0.00770        0.28110       -1.85940
C         -2.56810       -1.19000       -2.14420
C         -2.49670        0.14060       -2.55140
C         -1.55700       -2.16540       -2.66590
C         -1.23640       -3.34280       -1.95470
C         -0.93650       -1.98450       -3.92380
C         -0.33310       -4.27440       -2.46680
H         -1.69220       -3.54180       -0.99030
C         -0.04720       -2.92210       -4.42920
H         -1.19080       -1.12440       -4.53430
C          0.27810       -4.08670       -3.71090
H         -0.11280       -5.16860       -1.88980
H          0.39020       -2.76060       -5.41130
C         -3.48160        1.24320       -2.49260
C         -3.00460        2.52230       -2.85130
C         -4.85530        1.11360       -2.20770
C         -3.84650        3.62990       -2.88740
H         -1.95480        2.63980       -3.10630
C         -5.70030        2.22370       -2.25120
H         -5.28780        0.14960       -1.98110
C         -5.20260        3.48580       -2.58040
H         -3.44730        4.60180       -3.16270
H         -6.75700        2.09480       -2.03480
H         -5.86610        4.34520       -2.61180
C          1.25310       -5.09240       -4.26980
H          2.28690       -4.74690       -4.13910
H          1.16210       -6.06060       -3.76850
H          1.09740       -5.24360       -5.34350
C         -3.78550       -1.78250       -1.46740
H         -4.24840       -1.09370       -0.76350
H         -4.52700       -2.04390       -2.23460
H         -3.54950       -2.70380       -0.93380
H         -1.67180        0.38670       -3.20960
C         -3.86780       -0.78560        1.82300
C         -4.58410       -1.96130        2.15300
C         -4.51320        0.46570        1.69790
C         -5.96700       -1.85590        2.35050
C         -5.89760        0.51330        1.91230
C         -6.62100       -0.63240        2.23300
H         -6.53080       -2.74930        2.60370
H         -6.40770        1.46820        1.82280
H         -7.69390       -0.57150        2.39130
C         -3.93040       -3.31800        2.30360
H         -3.43880       -3.64470        1.38060
H         -3.16330       -3.31770        3.08570
H         -4.68010       -4.06920        2.56650
C         -3.78920        1.74580        1.36030
H         -3.14370        2.07730        2.18240
H         -3.16040        1.63340        0.47280
H         -4.50600        2.54780        1.16620
H         -1.15880        1.30430       -0.36410
129
22_Intermediate_O
S         -2.15770       -0.70180        1.52360
C         -3.31850       -2.09460        1.43920
C         -4.50320       -1.97780        2.21350
C         -3.09280       -3.21270        0.60610
C         -5.42980       -3.02620        2.16100
C         -4.05250       -4.23560        0.59820
C         -5.20700       -4.14990        1.36830
H         -6.33770       -2.95330        2.75290
H         -3.88310       -5.10530       -0.03070
H         -5.93700       -4.95410        1.34730
C         -4.82430       -0.78000        3.08090
H         -4.08720       -0.63280        3.87560
H         -4.85280        0.14820        2.50120
H         -5.80200       -0.91190        3.55220
C         -1.90900       -3.35110       -0.31750
H         -1.01840       -2.84370        0.05050
H         -1.66390       -4.40610       -0.47310
H         -2.14180       -2.92190       -1.30000
C          0.30220       -2.09690        2.34060
C         -0.83350       -1.16010        2.77710
C         -1.47920       -1.69660        4.08120
H         -2.32610       -2.34380        3.83630
H         -1.87490       -0.83760        4.63200
C          1.43880       -2.09330        3.39170
H          2.12600       -1.28150        3.13800
H          1.99310       -3.03080        3.27760
C          0.92910       -1.93170        4.84050
H          1.61200       -2.43750        5.53090
H          0.93090       -0.87100        5.12290
C         -0.49140       -2.48440        4.97330
H         -0.83660       -2.43770        6.01160
H         -0.49720       -3.54540        4.69220
O          0.90740       -1.81520        1.04580
H         -0.09700       -3.10590        2.21240
H         -0.40650       -0.17080        2.96300
P          0.97050       -0.43830        0.21870
O          1.84160        0.50490        1.24070
O          1.97890       -0.81210       -0.99870
C          2.58980        1.58620        0.72210
C          3.31950       -1.18840       -0.73140
C          3.68120        1.22530       -0.09700
C          2.28390        2.91610        1.04630
C          4.14010       -0.20300       -0.16040
C          3.77590       -2.46380       -1.10210
C          4.37320        2.22460       -0.80910
C          3.03670        3.87590        0.34390
C          1.31520        3.45150        2.13080
C          5.43200       -0.56380        0.28350
C          5.08230       -2.75770       -0.68460
C          2.97960       -3.45100       -1.98690
C          4.01960        3.57320       -0.59330
C          5.46310        1.90250       -1.80610
H          2.83650        4.92550        0.53390
C          0.28810        4.41850        1.49540
C          0.52700        2.37880        2.90440
C          2.16240        4.22400        3.17680
C          5.88940       -1.87080        0.03240
C          6.32350        0.40070        1.03240
H          5.49920       -3.73040       -0.91530
C          2.59720       -2.74720       -3.31320
C          3.82310       -4.69090       -2.35410
C          1.70270       -3.95970       -1.28320
C          4.71720        4.69050       -1.33420
H          6.44450        2.25050       -1.45810
H          5.53900        0.83330       -2.00650
H          5.27090        2.41130       -2.75790
H         -0.32710        3.90740        0.74720
H         -0.37930        4.81280        2.27080
H          0.76660        5.27280        1.00670
H         -0.17100        1.84610        2.25450
H          1.18550        1.65130        3.38760
H         -0.06210        2.87200        3.68630
H          2.88830        3.55920        3.65890
H          2.71300        5.05770        2.73120
H          1.50740        4.63410        3.95470
C          7.25760       -2.31860        0.49330
H          6.69610       -0.06040        1.95460
H          7.20670        0.67810        0.44220
H          5.80180        1.31940        1.30390
H          2.05890       -3.44750       -3.96350
H          1.95520       -1.87940       -3.14280
H          3.49280       -2.41190       -3.84900
H          4.09120       -5.28510       -1.47330
H          3.23560       -5.33480       -3.01740
H          4.74360       -4.42260       -2.88400
H          1.94010       -4.41770       -0.31640
H          0.98650       -3.15790       -1.11040
H          1.21670       -4.71890       -1.90800
H          4.35650        5.66690       -0.99790
H          4.54640        4.62640       -2.41650
H          5.80360        4.66260       -1.18460
H          7.33950       -2.30720        1.58800
H          8.05190       -1.66500        0.11180
H          7.46950       -3.33700        0.15520
Ir        -0.98430        0.27290       -0.59550
H         -0.13510        0.98360       -1.72740
C         -2.54930        0.78860       -2.32220
C         -3.28470        1.40410       -1.31380
C         -2.69970       -0.56090       -2.92850
C         -1.56800       -1.10500       -3.57670
C         -3.90790       -1.28450       -2.99200
C         -1.62750       -2.34160       -4.21890
H         -0.63960       -0.54110       -3.58270
C         -3.96640       -2.51430       -3.64650
H         -4.81700       -0.87280       -2.57230
C         -2.82730       -3.05500       -4.25080
H         -0.74020       -2.73820       -4.70350
H         -4.91170       -3.04740       -3.69370
C         -3.19720        2.88420       -1.13600
C         -2.14070        3.65780       -1.66530
C         -4.22870        3.57950       -0.47950
C         -2.13360        5.04220       -1.55610
H         -1.29600        3.17670       -2.14600
C         -4.21800        4.97150       -0.37710
H         -5.07170        3.04470       -0.05840
C         -3.17630        5.73300       -0.91450
H         -1.29870        5.60090       -1.97230
H         -5.04130        5.46960        0.12850
H         -2.88110       -4.01400       -4.75760
C         -3.16540        7.23890       -0.82060
H         -3.97570        7.60620       -0.18380
H         -2.21650        7.60540       -0.41160
H         -3.28420        7.69610       -1.81130
C         -4.38460        0.69630       -0.55710
H         -5.35580        0.92100       -1.01800
H         -4.25990       -0.38500       -0.55820
H         -4.43210        1.03660        0.47940
H         -1.95660        1.44900       -2.94500
H         -0.75730        1.62820        0.12210
129
22_Intermediate_P
S         -1.98940       -1.69320        0.97830
C          0.40280       -2.31130        2.30240
C         -0.97210       -1.67850        2.55080
C         -1.67180       -2.47370        3.68250
H         -2.20350       -3.32920        3.25310
H         -2.42920       -1.83030        4.13740
C          1.33080       -2.07940        3.51400
H          1.84930       -1.12720        3.37160
H          2.09310       -2.86570        3.50490
C          0.55940       -2.07810        4.85280
H          1.22030       -2.41060        5.66000
H          0.25110       -1.05570        5.10620
C         -0.67940       -2.97570        4.76360
H         -1.19560       -3.02320        5.72800
H         -0.36410       -4.00060        4.53100
O          1.09070       -1.88710        1.09220
H          0.25750       -3.38010        2.12620
H         -0.84440       -0.63280        2.83940
P          1.04630       -0.49190        0.30060
O          1.83770        0.48200        1.34880
O          2.09530       -0.76200       -0.91110
C          2.54840        1.60420        0.87270
C          3.44060       -1.09290       -0.61740
C          3.68600        1.31570        0.08830
C          2.15620        2.90540        1.21260
C          4.20820       -0.09040       -0.00330
C          3.94630       -2.34650       -0.99640
C          4.35230        2.36940       -0.56860
C          2.88360        3.92180        0.56640
C          1.08710        3.34640        2.24390
C          5.50210       -0.41560        0.46210
C          5.25270       -2.60290       -0.55530
C          3.20160       -3.34030       -1.91970
C          3.92200        3.69260       -0.33190
C          5.49230        2.13010       -1.53220
H          2.61560        4.95430        0.76640
C         -0.00740        4.17840        1.53400
C          0.39230        2.20420        3.01130
C          1.78660        4.22940        3.31170
C          6.01200       -1.70020        0.19390
C          6.34080        0.56060        1.25510
H          5.70780       -3.55660       -0.79230
C          2.86520       -2.62580       -3.25280
C          4.08290       -4.56060       -2.26450
C          1.90380       -3.88640       -1.28090
C          4.59340        4.86250       -1.01380
H          6.44300        2.51150       -1.13730
H          5.62550        1.07230       -1.76110
H          5.31140        2.65900       -2.47520
H         -0.52520        3.58360        0.77370
H         -0.75050        4.51990        2.26450
H          0.40450        5.06430        1.04010
H         -0.21670        1.58060        2.35380
H          1.10630        1.56040        3.53330
H         -0.27510        2.64510        3.76090
H          2.56250        3.66280        3.83920
H          2.25420        5.11930        2.88040
H          1.05070        4.56640        4.05110
C          7.38650       -2.10700        0.67440
H          6.69830        0.09350        2.18030
H          7.23310        0.87420        0.69790
H          5.78360        1.45820        1.52650
H          2.35810       -3.32250       -3.93150
H          2.21110       -1.76430       -3.09740
H          3.77820       -2.27770       -3.74960
H          4.33270       -5.15400       -1.37780
H          3.53240       -5.21220       -2.95160
H          5.01520       -4.27030       -2.76090
H          2.10720       -4.34910       -0.30880
H          1.15500       -3.10850       -1.13410
H          1.47080       -4.65170       -1.93620
H          4.16920        5.81070       -0.67100
H          4.47430        4.81860       -2.10410
H          5.67220        4.88530       -0.81570
H          7.44870       -2.10740        1.77040
H          8.16430       -1.42150        0.31550
H          7.63960       -3.11290        0.32700
Ir        -0.90990        0.07600       -0.63030
H         -0.03710        1.02600       -1.54800
C         -2.28330        0.44280       -2.57790
C         -3.11210        1.13430       -1.69780
C         -2.38220       -0.93230       -3.13520
C         -1.20200       -1.47570       -3.69460
C         -3.56470       -1.69620       -3.22520
C         -1.19040       -2.74530       -4.27030
H         -0.29120       -0.88250       -3.68230
C         -3.55110       -2.95970       -3.81470
H         -4.50840       -1.29310       -2.88210
C         -2.36560       -3.49660       -4.32610
H         -0.26780       -3.13810       -4.68690
H         -4.47760       -3.52210       -3.88730
C         -3.00550        2.62080       -1.58060
C         -1.91010        3.35650       -2.08480
C         -4.05070        3.36150       -0.99800
C         -1.87250        4.74260       -2.01270
H         -1.05820        2.84610       -2.51910
C         -4.00890        4.75490       -0.93090
H         -4.92650        2.86130       -0.60320
C         -2.92330        5.47630       -1.43570
H         -1.00670        5.26860       -2.40780
H         -4.84200        5.28640       -0.47790
H         -2.36500       -4.48190       -4.78280
C         -2.87670        6.98330       -1.37620
H         -3.69190        7.38510       -0.76700
H         -1.92850        7.33580       -0.95370
H         -2.96190        7.42050       -2.37930
C         -4.30980        0.49130       -1.04190
H         -5.21170        0.70210       -1.63300
H         -4.20820       -0.58770       -0.96020
H         -4.47970        0.88260       -0.03870
H         -1.59220        1.05140       -3.15050
H         -0.95530        1.32400        0.28370
C         -3.70310       -1.60550        1.55190
C         -4.53210       -2.69590        1.19590
C         -4.19770       -0.50520        2.28820
C         -5.87260       -2.66170        1.60290
C         -5.54360       -0.52920        2.67790
C         -6.37560       -1.59390        2.34150
H         -6.52240       -3.49120        1.33860
H         -5.93830        0.30740        3.24800
H         -7.41680       -1.58910        2.65110
C         -3.35520        0.68710        2.67530
H         -2.70000        0.46470        3.52660
H         -2.71870        1.02470        1.85160
H         -3.99480        1.52160        2.97560
C         -4.04030       -3.88430        0.39870
H         -3.70580       -3.59510       -0.60430
H         -3.19420       -4.38060        0.88600
H         -4.84350       -4.61750        0.28400
129
23_Intermediate_A
S         -2.01790       -0.50960        1.54000
C         -3.72370       -1.10860        1.45990
C         -4.70400       -0.27660        2.05650
C         -4.06580       -2.32680        0.83110
C         -6.03940       -0.69330        2.00490
C         -5.41830       -2.69960        0.82220
C         -6.39640       -1.89650        1.39900
H         -6.80300       -0.06590        2.45590
H         -5.69760       -3.63440        0.34390
H         -7.43780       -2.20480        1.37410
C         -4.37120        1.02430        2.75400
H         -3.70970        0.86280        3.61230
H         -3.86500        1.73430        2.09140
H         -5.28650        1.49900        3.11840
C         -3.06800       -3.26160        0.18830
H         -2.72140       -4.02000        0.90240
H         -3.53510       -3.79530       -0.64420
H         -2.19190       -2.73690       -0.19800
C          0.35670       -1.53390        2.66150
C         -1.14830       -1.82060        2.55990
C         -1.78780       -1.86470        3.96040
H         -2.85340       -2.09490        3.86410
H         -1.71370       -0.86990        4.41930
C          1.04820       -2.54550        3.58290
H          2.10790       -2.27640        3.64520
H          0.99170       -3.53120        3.10320
C          0.40450       -2.60260        4.97370
H          0.90770       -3.36870        5.57410
H          0.55470       -1.64570        5.49230
C         -1.09580       -2.89680        4.86440
H         -1.56660       -2.87860        5.85390
H         -1.24870       -3.90640        4.45880
O          1.01190       -1.68520        1.36630
P          1.12760       -0.48250        0.29920
O          2.03340        0.55570        1.19430
O          2.12520       -1.06980       -0.83190
C          2.74860        1.56360        0.51520
C          3.47930       -1.36910       -0.55220
C          3.81260        1.12650       -0.29220
C          2.41830        2.91360        0.71130
C          4.30330       -0.29020       -0.18880
C          3.94110       -2.68440       -0.72390
C          4.45320        2.06210       -1.13440
C          3.11770        3.81050       -0.10940
C          1.46600        3.40830        1.82430
C          5.62180       -0.56070        0.24340
C          5.27230       -2.88930       -0.33380
C          3.11330       -3.82190       -1.37040
C          4.07580        3.41670       -1.04800
C          5.50980        1.65190       -2.13480
H          2.90650        4.87000       -0.03030
C          1.32750        4.94560        1.81100
C          0.04310        2.81870        1.69610
C          2.06560        3.00300        3.19480
C          6.09500       -1.88500        0.18180
C          6.52780        0.51700        0.79500
H          5.69620       -3.88190       -0.42060
C          2.60480       -3.36610       -2.76110
C          3.97240       -5.08610       -1.59340
C          1.91410       -4.23760       -0.48810
C          4.72190        4.45900       -1.93180
H          6.49610        2.05520       -1.87130
H          5.60190        0.56810       -2.21560
H          5.26690        2.04470       -3.12900
H          0.88470        5.30890        0.87680
H          0.66780        5.25060        2.63060
H          2.28830        5.45000        1.95910
H         -0.36700        2.97550        0.69320
H          0.02590        1.75000        1.91180
H         -0.62660        3.30760        2.41350
H          2.17590        1.91830        3.28270
H          3.05140        3.45940        3.34000
H          1.41180        3.34540        4.00630
C          7.49380       -2.23230        0.63860
H          6.95090        0.20250        1.75610
H          7.37740        0.71220        0.12800
H          6.00290        1.45980        0.95310
H          2.04340       -4.18070       -3.23430
H          1.94700       -2.49700       -2.69070
H          3.44430       -3.11020       -3.41810
H          4.31940       -5.52390       -0.65070
H          3.36420       -5.84260       -2.10080
H          4.84560       -4.88610       -2.22420
H          2.24750       -4.53320        0.51330
H          1.18360       -3.43670       -0.37680
H          1.40700       -5.09740       -0.94290
H          4.35220        5.45990       -1.69080
H          4.51520        4.27330       -2.99380
H          5.81330        4.46780       -1.82100
H          7.62820       -2.04100        1.71120
H          8.25390       -1.63820        0.11600
H          7.71230       -3.28910        0.46010
Ir        -0.82420        0.13100       -0.66570
H          0.06170        0.57670       -1.90230
H         -0.75590       -1.26130       -1.33870
C         -2.92720        0.21360       -1.75420
H         -3.56230        0.33110       -0.88100
C         -2.28300        1.36770       -2.21320
C         -3.31650       -0.97160       -2.57550
C         -4.67470       -1.33580       -2.54650
C         -2.44680       -1.73010       -3.37910
C         -5.15270       -2.40210       -3.30930
H         -5.36430       -0.77330       -1.92310
C         -2.92290       -2.80000       -4.13770
H         -1.38680       -1.50030       -3.39710
C         -4.27780       -3.13950       -4.10990
H         -6.20810       -2.65750       -3.27340
H         -2.22940       -3.37260       -4.74720
H         -4.64570       -3.97340       -4.70080
C         -2.42020        2.66390       -1.47840
C         -1.50120        3.71110       -1.69520
C         -3.51040        2.92870       -0.62420
C         -1.66100        4.95100       -1.08230
H         -0.64630        3.55990       -2.34480
C         -3.66070        4.16930       -0.01110
H         -4.27920        2.17900       -0.47120
C         -2.73870        5.20560       -0.22250
H         -0.93560        5.73630       -1.27920
H         -4.52390        4.34260        0.62630
C         -2.89550        6.54240        0.45860
H         -2.36270        6.55470        1.41880
H         -2.48370        7.35270       -0.15140
H         -3.94680        6.76560        0.66640
C         -1.76380        1.48130       -3.63330
H         -1.68820        0.51550       -4.12750
H         -2.47300        2.10110       -4.19800
H         -0.78960        1.96970       -3.68930
H          0.53070       -0.51720        3.03150
H         -1.27630       -2.77650        2.04760
129
23_Intermediate_B
S         -1.96520       -1.76900        0.84890
C          0.27790       -1.57880        2.61870
C         -0.95700       -2.43080        2.30950
C         -1.82150       -2.68480        3.55390
H         -2.64360       -3.35910        3.29530
H         -2.27630       -1.74890        3.89640
C          1.08640       -2.15550        3.78510
H          1.91900       -1.47550        3.99510
H          1.52230       -3.10800        3.45760
C          0.21540       -2.38020        5.02790
H          0.82440       -2.82580        5.82220
H         -0.14530       -1.41540        5.41100
C         -0.97880       -3.28170        4.69440
H         -1.61850       -3.41680        5.57400
H         -0.61920       -4.27870        4.40590
O          1.17170       -1.59210        1.46390
P          1.17510       -0.41080        0.36610
O          2.01920        0.71290        1.22090
O          2.21020       -0.94770       -0.76060
C          2.66340        1.74700        0.51250
C          3.58190       -1.15110       -0.48380
C          3.75110        1.36390       -0.29040
C          2.24790        3.07740        0.67760
C          4.33600       -0.01270       -0.15420
C          4.12950       -2.43690       -0.62730
C          4.32500        2.31940       -1.15830
C          2.88250        3.99950       -0.16710
C          1.27790        3.53470        1.78860
C          5.67200       -0.18380        0.27510
C          5.47350       -2.54390       -0.24220
C          3.37730       -3.63750       -1.25080
C          3.85940        3.64760       -1.10270
C          5.40230        1.95660       -2.15480
H          2.60190        5.04430       -0.11050
C          0.97450        5.04480        1.69460
C         -0.07380        2.78830        1.74310
C          1.95250        3.27010        3.15850
C          6.23120       -1.47510        0.24270
C          6.50710        0.96560        0.79320
H          5.96280       -3.50790       -0.30810
C          2.88080       -3.24950       -2.66640
C          4.30490       -4.86140       -1.41240
C          2.17820       -4.08800       -0.38600
C          4.42990        4.70840       -2.01600
H          6.35760        2.43980       -1.91250
H          5.57360        0.88050       -2.20310
H          5.12440        2.29910       -3.15860
H          0.49100        5.30740        0.74680
H          0.29110        5.32240        2.50440
H          1.87600        5.65660        1.80470
H         -0.51400        2.80800        0.74060
H          0.02920        1.74990        2.05690
H         -0.78200        3.26870        2.42870
H          2.17560        2.20760        3.29590
H          2.88890        3.83220        3.24840
H          1.28770        3.58630        3.97180
C          7.65260       -1.71710        0.69710
H          6.96090        0.70270        1.75580
H          7.33410        1.20550        0.11230
H          5.91940        1.87280        0.93770
H          2.37340       -4.10500       -3.12850
H          2.17740       -2.41370       -2.63760
H          3.72210       -2.96930       -3.31090
H          4.65880       -5.24370       -0.44820
H          3.74590       -5.66780       -1.89920
H          5.17690       -4.63980       -2.03750
H          2.49540       -4.32070        0.63680
H          1.39920       -3.32790       -0.33380
H          1.73720       -4.99480       -0.81810
H          4.00040        5.68930       -1.79270
H          4.22440        4.48660       -3.07130
H          5.51970        4.78790       -1.91830
H          7.77880       -1.49840        1.76550
H          8.36710       -1.08130        0.15980
H          7.94300       -2.75930        0.53560
Ir        -0.80640        0.03490       -0.63350
H          0.04810        1.03060       -1.52450
H         -0.34170       -0.98710       -1.70180
C         -2.81780       -0.05420       -1.81180
H         -3.50230       -0.10270       -0.96660
C         -2.32090        1.21080       -2.14910
C         -3.02290       -1.14900       -2.82470
C         -2.44680       -2.42510       -2.73930
C         -3.91690       -0.89390       -3.88010
C         -2.73850       -3.40790       -3.68930
H         -1.76510       -2.65270       -1.92830
C         -4.21200       -1.87550       -4.82710
H         -4.38780        0.08240       -3.95780
C         -3.61970       -3.13720       -4.73750
H         -2.27340       -4.38640       -3.60620
H         -4.90320       -1.65180       -5.63490
H         -3.84490       -3.90190       -5.47550
C         -2.71950        2.43300       -1.38510
C         -1.95000        3.61210       -1.44150
C         -3.93030        2.48360       -0.66690
C         -2.36740        4.77550       -0.80210
H         -1.00840        3.62350       -1.98000
C         -4.34100        3.65090       -0.02810
H         -4.58370        1.61800       -0.63600
C         -3.56870        4.81980       -0.07870
H         -1.75060        5.66820       -0.86950
H         -5.28970        3.65780        0.50270
C         -4.00790        6.07890        0.62710
H         -3.57340        6.13450        1.63420
H         -3.68540        6.97410        0.08560
H         -5.09610        6.11610        0.73890
C         -1.67430        1.43780       -3.50250
H         -1.29290        0.50690       -3.92420
H         -2.42670        1.84640       -4.18950
H         -0.85500        2.15670       -3.45430
C         -3.62160       -1.37140        1.46440
C         -4.64040       -2.30480        1.15260
C         -3.90370       -0.17320        2.16080
C         -5.95190       -2.00380        1.54450
C         -5.23240        0.07450        2.53140
C         -6.24930       -0.82630        2.22430
H         -6.74420       -2.70960        1.31210
H         -5.46430        0.98790        3.07180
H         -7.27250       -0.61210        2.51970
C         -4.37970       -3.60670        0.42740
H         -3.65160       -4.23050        0.95770
H         -5.30750       -4.17850        0.33710
H         -3.98510       -3.44150       -0.58040
C         -2.85110        0.83970        2.53910
H         -2.07560        0.40540        3.17840
H         -2.34700        1.26990        1.66740
H         -3.30390        1.66690        3.09250
H         -0.01230       -0.54750        2.84320
H         -0.59800       -3.38910        1.92000
129
23_Intermediate_C
S         -2.12030        0.19750        1.67950
C         -3.70890       -0.67580        1.71880
C         -4.81310        0.04820        2.23270
C         -3.84140       -2.00650        1.25780
C         -6.05820       -0.59320        2.27230
C         -5.11020       -2.59940        1.33190
C         -6.20880       -1.90420        1.82850
H         -6.91460       -0.05220        2.66450
H         -5.22850       -3.62390        0.99030
H         -7.18160       -2.38560        1.87290
C         -4.71150        1.46710        2.74840
H         -4.04780        1.53640        3.61650
H         -4.32470        2.15270        1.98900
H         -5.69890        1.82500        3.05340
C         -2.71460       -2.81820        0.66280
H         -1.77470       -2.72630        1.21070
H         -2.98690       -3.87720        0.64010
H         -2.51330       -2.50890       -0.36920
C          0.30320       -0.21090        3.06450
C         -1.17520       -0.62240        3.08090
C         -1.83570       -0.23760        4.41750
H         -2.87770       -0.57200        4.41320
H         -1.84470        0.85600        4.50960
C          1.05270       -0.76460        4.28320
H          2.08410       -0.39900        4.23920
H          1.09250       -1.85690        4.18220
C          0.38160       -0.39020        5.60960
H          0.93270       -0.85130        6.43670
H          0.43400        0.69680        5.76170
C         -1.08380       -0.83870        5.61480
H         -1.58070       -0.52980        6.54140
H         -1.13760       -1.93530        5.57510
O          0.98590       -0.78150        1.91100
P          1.09090       -0.03400        0.48820
O          2.10450        1.18300        0.90480
O          1.98790       -1.05810       -0.39410
C          2.96020        1.76240       -0.05270
C          3.28020       -1.43030        0.05040
C          3.98640        0.92230       -0.53560
C          2.81780        3.10330       -0.43640
C          4.24520       -0.41110        0.10620
C          3.54540       -2.77620        0.35010
C          4.80110        1.36980       -1.59530
C          3.70500        3.52090       -1.44530
C          1.89240        4.18330        0.17820
C          5.49110       -0.69010        0.71210
C          4.81720       -3.01190        0.89190
C          2.58050       -3.94330        0.03210
C          4.64450        2.69440       -2.05490
C          5.82100        0.47790       -2.26610
H          3.65370        4.55030       -1.78460
C          1.12150        4.91940       -0.94570
C          0.84700        3.67450        1.18930
C          2.79310        5.20190        0.92440
C          5.76150       -2.00870        1.12400
C          6.52740        0.38410        0.95390
H          5.09140       -4.02350        1.16510
C          2.22260       -3.91430       -1.47520
C          3.23500       -5.31200        0.31940
C          1.28570       -3.87390        0.87330
C          5.49980        3.23530       -3.17770
H          6.84730        0.80340       -2.05240
H          5.72840       -0.56320       -1.95480
H          5.70150        0.51620       -3.35500
H          0.51720        4.21840       -1.53260
H          0.44890        5.66470       -0.50540
H          1.78400        5.44740       -1.63770
H          0.13890        2.97880        0.72870
H          1.30440        3.18320        2.05120
H          0.27050        4.53210        1.55510
H          3.33290        4.71630        1.74550
H          3.53200        5.65870        0.25850
H          2.17910        6.00540        1.34890
C          7.07520       -2.36280        1.78290
H          6.85690        0.36570        1.99940
H          7.42470        0.22840        0.34090
H          6.14540        1.38330        0.74100
H          1.55920       -4.75430       -1.71450
H          1.71240       -2.99010       -1.75650
H          3.12440       -4.01190       -2.09080
H          3.46360       -5.44730        1.38250
H          2.53720       -6.10560        0.03090
H          4.15660       -5.45770       -0.25460
H          1.51270       -3.85020        1.94510
H          0.68730       -2.99480        0.63540
H          0.67400       -4.76250        0.67530
H          5.28620        4.29300       -3.35710
H          5.32300        2.69560       -4.11710
H          6.57010        3.14050       -2.95680
H          7.19910       -1.84480        2.74280
H          7.93340       -2.08050        1.16050
H          7.13900       -3.43770        1.97520
Ir        -0.86620        0.36300       -0.54430
H          0.03750        0.59170       -1.83770
H         -0.81830       -1.14660       -0.87150
C         -2.30530        0.37110       -2.62770
C         -3.00060        0.77440       -1.48610
C         -2.39110       -1.05110       -3.08620
C         -1.30090       -1.68670       -3.70900
C         -3.59730       -1.76330       -2.98740
C         -1.41050       -2.98750       -4.18890
H         -0.34940       -1.17010       -3.78940
C         -3.70320       -3.06480       -3.48060
H         -4.47240       -1.29250       -2.55000
C         -2.61540       -3.70260       -4.08840
H         -0.54560       -3.45870       -4.64960
H         -4.65290       -3.58740       -3.39800
C         -1.79380        1.33410       -3.67720
H         -0.85890        0.98880       -4.12320
H         -2.54210        1.36450       -4.48160
H         -1.65290        2.34690       -3.30670
H         -3.59400        0.00090       -1.00380
C         -3.45260        2.15640       -1.15790
C         -2.61720        3.28740       -1.14970
C         -4.80920        2.33240       -0.82790
C         -3.12440        4.55040       -0.83890
H         -1.56200        3.19250       -1.38170
C         -5.31870        3.59640       -0.53070
H         -5.47030        1.46990       -0.81320
C         -4.47750        4.71200       -0.53440
H         -2.45760        5.40800       -0.83660
H         -6.37250        3.70770       -0.29130
H         -4.87170        5.69610       -0.29820
C         -2.73510       -5.10090       -4.64480
H         -2.83550       -5.08100       -5.73790
H         -1.84650       -5.69920       -4.41510
H         -3.61120       -5.61850       -4.24240
H         -1.23310       -1.70290        2.92600
H          0.39430        0.88120        3.03770
129
23_Intermediate_D
S         -2.16270       -0.83380        1.26890
C          0.21200       -0.57230        2.85470
C         -1.14060       -1.29170        2.79380
C         -1.94380       -1.14550        4.09590
H         -2.86110       -1.73820        4.02680
H         -2.25030       -0.10340        4.23570
C          1.01140       -0.97280        4.09970
H          1.93270       -0.38100        4.12110
H          1.30640       -2.02380        3.98460
C          0.20130       -0.80080        5.39080
H          0.80210       -1.13730        6.24290
H         -0.01490        0.26360        5.55880
C         -1.11160       -1.58780        5.31060
H         -1.70600       -1.44160        6.21970
H         -0.89440       -2.66240        5.24140
O          1.02600       -0.98650        1.71610
P          1.12910       -0.12540        0.35730
O          2.14310        1.05240        0.88680
O          2.02960       -1.06820       -0.60850
C          3.07880        1.67420        0.03650
C          3.29860       -1.52470       -0.18210
C          4.07860        0.85330       -0.51630
C          3.03250        3.06660       -0.15030
C          4.29130       -0.54710       -0.01610
C          3.51460       -2.90140       -0.00860
C          4.93350        1.39410       -1.50400
C          3.94490        3.56690       -1.08940
C          2.12210        4.01210        0.66460
C          5.52020       -0.92320        0.57320
C          4.77050       -3.22930        0.52170
C          2.51810       -4.00010       -0.45090
C          4.84380        2.76750       -1.79960
C          5.92540        0.54290       -2.26450
H          3.95550        4.63030       -1.29500
C          0.63500        3.77170        0.33400
C          2.37080        3.79530        2.17850
C          2.42080        5.49620        0.36270
C          5.74290       -2.28380        0.85770
C          6.58750        0.08620        0.93080
H          5.00970       -4.27040        0.70010
C          2.21770       -3.83300       -1.96180
C          3.11210       -5.41180       -0.25480
C          1.19510       -3.95090        0.34740
C          5.73330        3.39780       -2.84660
H          6.96160        0.80300       -2.01230
H          5.79100       -0.52190       -2.07080
H          5.81610        0.70530       -3.34320
H          0.33000        2.74770        0.56110
H          0.00220        4.44880        0.92030
H          0.43540        3.95790       -0.72580
H          2.13510        2.77570        2.49130
H          3.41790        3.99750        2.43220
H          1.74540        4.48380        2.75980
H          3.46080        5.75990        0.58430
H          2.21260        5.75800       -0.68070
H          1.77920        6.12270        0.99180
C          7.03670       -2.74270        1.49060
H          6.89330       -0.03850        1.97640
H          7.49180       -0.04710        0.32300
H          6.24580        1.11380        0.80200
H          1.52790       -4.61900       -2.29280
H          1.75950       -2.86530       -2.18110
H          3.13660       -3.92090       -2.55320
H          3.30470       -5.63610        0.80050
H          2.39410       -6.15280       -0.62230
H          4.04390       -5.54950       -0.81380
H          1.38260       -3.99670        1.42590
H          0.62240       -3.04700        0.14050
H          0.57230       -4.81130        0.07400
H          5.57630        4.47940       -2.89280
H          5.53460        2.98940       -3.84600
H          6.79610        3.22020       -2.64030
H          7.16850       -2.32040        2.49530
H          7.91030       -2.43410        0.90300
H          7.06210       -3.83240        1.58250
Ir        -0.83250        0.27980       -0.66650
H          0.00380        0.84640       -1.89190
H         -0.56720       -1.12020       -1.27510
C         -2.44640        0.01060       -2.65350
C         -2.92080        0.85110       -1.64780
C         -2.88860       -1.41800       -2.68740
C         -2.03890       -2.43750       -3.15730
C         -4.20770       -1.76690       -2.35620
C         -2.48250       -3.75220       -3.25300
H         -1.01460       -2.20650       -3.43400
C         -4.65140       -3.08580       -2.46990
H         -4.90960       -1.00000       -2.04330
C         -3.79820       -4.10470       -2.90980
H         -1.79770       -4.51930       -3.60650
H         -5.68340       -3.32060       -2.22190
C         -1.79630        0.48390       -3.93350
H         -0.89400       -0.08770       -4.16590
H         -2.50720        0.30420       -4.75080
H         -1.54210        1.54080       -3.92460
H         -3.60980        0.38230       -0.94900
C         -3.04600        2.33420       -1.63890
C         -2.09350        3.24830       -2.13190
C         -4.23140        2.85610       -1.08160
C         -2.33950        4.62180       -2.10270
H         -1.14280        2.89530       -2.51270
C         -4.47720        4.22730       -1.05790
H         -4.97300        2.17360       -0.67580
C         -3.53260        5.11820       -1.57420
H         -1.58880        5.30510       -2.48940
H         -5.40560        4.59930       -0.63400
H         -3.72010        6.18790       -1.55580
C         -4.26790       -5.53550       -3.01360
H         -3.99370       -5.97520       -3.97930
H         -3.80750       -6.15790       -2.23550
H         -5.35350       -5.61000       -2.90000
C         -3.65690        0.00470        1.86150
C         -4.84430       -0.76920        1.82960
C         -3.66860        1.35400        2.28530
C         -6.04580       -0.15270        2.20340
C         -4.89870        1.91810        2.65190
C         -6.07750        1.17920        2.60690
H         -6.96340       -0.73360        2.18100
H         -4.92230        2.95370        2.97890
H         -7.01900        1.63970        2.89250
C         -4.87160       -2.22890        1.43300
H         -4.54050       -2.38270        0.40110
H         -4.21740       -2.83410        2.07070
H         -5.88770       -2.62290        1.52520
C         -2.43280        2.21110        2.41100
H         -1.77120        2.13140        1.54640
H         -2.70930        3.26290        2.52280
H         -1.84380        1.93650        3.29490
H         -0.93330       -2.35240        2.61730
H          0.07340        0.51330        2.82600
129
23_Intermediate_E
S         -2.11600       -0.41020        1.72000
C         -3.82350       -0.98980        1.52110
C         -4.78820       -0.46860        2.41790
C         -4.16240       -1.94300        0.53440
C         -6.10540       -0.93370        2.30740
C         -5.49180       -2.38580        0.48400
C         -6.45560       -1.88840        1.35620
H         -6.85830       -0.54410        2.98660
H         -5.76800       -3.12450       -0.26320
H         -7.48030       -2.24380        1.29410
C         -4.46780        0.55860        3.48260
H         -3.74540        0.17980        4.21270
H         -4.03920        1.47230        3.05800
H         -5.37740        0.83420        4.02320
C         -3.19100       -2.47640       -0.49180
H         -2.22940       -2.77660       -0.06870
H         -3.61960       -3.34360       -1.00160
H         -2.97970       -1.71300       -1.24770
C          0.17540       -1.93420        2.47310
C         -1.35500       -1.95080        2.49800
C         -1.86880       -2.08910        3.94310
H         -2.96200       -2.13060        3.93490
H         -1.57960       -1.19800        4.51520
C          0.75500       -3.17170        3.16800
H          1.84690       -3.09210        3.14510
H          0.48110       -4.05340        2.57420
C          0.23540       -3.32360        4.60320
H          0.64120       -4.24270        5.04030
H          0.60110       -2.49170        5.22110
C         -1.29680       -3.34330        4.62330
H         -1.66970       -3.39460        5.65260
H         -1.66300       -4.24160        4.10760
O          0.67130       -1.98450        1.10160
P          0.98630       -0.63330        0.28270
O          2.17260       -0.03330        1.23990
O          1.72310       -1.15510       -1.05940
C          3.07770        0.90500        0.70770
C          2.97190       -1.81880       -1.00440
C          3.95360        0.40180       -0.27800
C          3.11710        2.22410        1.18090
C          4.06130       -1.07980       -0.51210
C          3.07280       -3.12680       -1.50560
C          4.77760        1.30080       -0.98490
C          4.01290        3.06140        0.49120
C          2.40890        2.81180        2.43020
C          5.28790       -1.74910       -0.29570
C          4.32780       -3.72460       -1.32300
C          1.94680       -3.84880       -2.28440
C          4.79120        2.65540       -0.59010
C          5.63100        0.86830       -2.15510
H          4.10350        4.09490        0.80830
C          1.77360        4.18350        2.10190
C          1.29000        1.94700        3.04350
C          3.49670        3.00320        3.51950
C          5.40540       -3.09320       -0.69730
C          6.46640       -1.07830        0.37360
H          4.48190       -4.73890       -1.67040
C          1.51070       -2.97630       -3.48840
C          2.43220       -5.19910       -2.85480
C          0.72380       -4.14750       -1.38770
C          5.66420        3.66280       -1.30240
H          6.70180        0.95360       -1.92940
H          5.43190       -0.16130       -2.45370
H          5.44250        1.51320       -3.02180
H          1.01240        4.08920        1.32100
H          1.29050        4.58530        3.00010
H          2.50510        4.92530        1.76990
H          0.45280        1.80750        2.34930
H          1.64760        0.96730        3.36590
H          0.89390        2.46630        3.92400
H          3.94380        2.04230        3.79950
H          4.30040        3.66240        3.17610
H          3.05490        3.44840        4.41920
C          6.69470       -3.85520       -0.49260
H          6.84580       -1.70390        1.19010
H          7.30170       -0.93420       -0.32400
H          6.20750       -0.10440        0.79060
H          0.73710       -3.49960       -4.06330
H          1.10300       -2.01390       -3.17080
H          2.35730       -2.78740       -4.15870
H          2.70240       -5.91010       -2.06590
H          1.62150       -5.64940       -3.43770
H          3.29280       -5.07970       -3.52220
H          1.01280       -4.74170       -0.51330
H          0.24030       -3.23770       -1.03280
H         -0.01560       -4.72250       -1.95850
H          5.59550        4.64540       -0.82660
H          5.37140        3.77990       -2.35370
H          6.71890        3.36110       -1.30150
H          6.93330       -3.97020        0.57270
H          7.54880       -3.34250       -0.95210
H          6.63040       -4.85660       -0.92800
Ir        -0.75590        0.65910       -0.27410
H          0.25920        1.24070       -1.33840
H         -1.05200       -0.41020       -1.35350
C         -2.89270        1.84290       -1.06950
C         -1.74640        2.49550       -1.52330
C         -3.63320        0.94430       -2.01570
C         -5.00880        0.71670       -1.84380
C         -3.03000        0.36380       -3.15400
C         -5.74390       -0.03740       -2.76190
H         -5.53690        1.14220       -0.99880
C         -3.76420       -0.39130       -4.05920
H         -1.96670        0.48260       -3.33380
C         -5.14250       -0.60720       -3.88640
H         -6.80840       -0.17920       -2.59300
H         -3.25790       -0.82350       -4.91920
C         -1.11240        3.77550       -1.10780
C          0.11600        4.09950       -1.72580
C         -1.69680        4.74770       -0.27190
C          0.73890        5.32460       -1.51140
H          0.57840        3.37550       -2.39160
C         -1.07010        5.97740       -0.05760
H         -2.66250        4.58160        0.18400
C          0.14810        6.27230       -0.67010
H          1.68140        5.54260       -2.00520
H         -1.55010        6.71200        0.58270
H          0.62780        7.23230       -0.50290
C         -5.93040       -1.42530       -4.88040
H         -5.55570       -2.45520       -4.93340
H         -6.99050       -1.46630       -4.61310
H         -5.85200       -1.00520       -5.89060
C         -3.64310        2.29660        0.16550
H         -2.97420        2.69730        0.92730
H         -4.36470        3.08190       -0.09690
H         -4.20590        1.47570        0.60950
H         -1.42810        2.21770       -2.52160
H         -1.69860       -2.79710        1.89800
H          0.55710       -1.03110        2.96040
129
23_Intermediate_F
S          2.18890       -1.29470       -1.17210
C         -0.08410       -0.97420       -2.91890
C          1.17990       -1.81370       -2.70120
C          2.04430       -1.87130       -3.97020
H          2.90510       -2.52380       -3.80080
H          2.44200       -0.87550       -4.19620
C         -0.87210       -1.44960       -4.14530
H         -1.73420       -0.78640       -4.27400
H         -1.26500       -2.45070       -3.92570
C         -0.00410       -1.49520       -5.40740
H         -0.59860       -1.87670       -6.24490
H          0.31130       -0.47880       -5.68070
C          1.23110       -2.37240       -5.17570
H          1.87720       -2.37320       -6.06080
H          0.92080       -3.41250       -5.00690
O         -0.98510       -1.14640       -1.78900
P         -1.02590       -0.13450       -0.53830
O         -1.85180        1.10090       -1.22240
O         -2.08820       -0.84800        0.45990
C         -2.64060        1.95110       -0.42210
C         -3.40150       -1.12690        0.01310
C         -3.79090        1.36050        0.14430
C         -2.30760        3.30160       -0.25990
C         -4.21800       -0.01930       -0.26800
C         -3.83460       -2.46040       -0.06640
C         -4.55250        2.09540        1.07490
C         -3.13570        4.00680        0.63220
C         -1.19810        4.10490       -0.98190
C         -5.47340       -0.23960       -0.87770
C         -5.11000       -2.62400       -0.62650
C         -3.04560       -3.66620        0.49920
C         -4.20320        3.44020        1.32280
C         -5.71180        1.48890        1.83250
H         -2.92600        5.05660        0.81120
C         -0.25140        4.73410        0.06690
C         -0.32760        3.30320       -1.96980
C         -1.87960        5.23330       -1.79940
C         -5.90590       -1.56520       -1.07180
C         -6.35120        0.89890       -1.34570
H         -5.50920       -3.62450       -0.73870
C         -2.73560       -3.41560        1.99640
C         -3.87070       -4.96890        0.41520
C         -1.72660       -3.91780       -0.26780
C         -4.98580        4.27720        2.30850
H         -6.66990        1.92850        1.52600
H         -5.77860        0.40970        1.69180
H         -5.60800        1.68320        2.90630
H          0.24990        3.95940        0.65650
H          0.52130        5.32880       -0.43460
H         -0.77860        5.39560        0.76140
H          0.25680        2.52440       -1.47060
H         -0.92060        2.83460       -2.75980
H          0.38210        3.99200       -2.44310
H         -2.55000        4.81480       -2.55880
H         -2.46490        5.90790       -1.16710
H         -1.11830        5.83330       -2.31200
C         -7.23750       -1.85980       -1.72400
H         -6.66180        0.73900       -2.38480
H         -7.27130        0.97190       -0.75150
H         -5.84140        1.86200       -1.29280
H         -2.19680       -4.27540        2.41280
H         -2.11750       -2.52650        2.14150
H         -3.66140       -3.28870        2.56960
H         -4.08150       -5.26020       -0.61990
H         -3.29710       -5.78170        0.87350
H         -4.82190       -4.89190        0.95330
H         -1.91280       -4.04530       -1.34010
H         -1.01250       -3.10400       -0.14260
H         -1.25870       -4.83640        0.10650
H         -4.62090        5.30830        2.32240
H         -4.90480        3.88130        3.32920
H         -6.05490        4.30130        2.06430
H         -7.26630       -1.50670       -2.76310
H         -8.06620       -1.36630       -1.20120
H         -7.43930       -2.93490       -1.73320
Ir         0.88590        0.18820        0.55350
H         -0.00770        0.98670        1.59170
C          2.94930       -0.25850        2.27860
C          2.39920        1.01440        2.34090
C          2.38940       -1.33310        3.15270
C          2.38090       -2.67760        2.73200
C          1.90180       -1.05020        4.43960
C          1.88190       -3.68420        3.55150
H          2.74000       -2.93420        1.73990
C          1.41410       -2.06620        5.26180
H          1.93630       -0.03520        4.82340
C          1.38620       -3.39940        4.83420
H          1.87830       -4.71030        3.19140
H          1.06020       -1.81690        6.25900
C          2.95280        2.32660        1.93430
C          2.39850        3.45720        2.57310
C          3.99730        2.54340        1.01240
C          2.87630        4.74110        2.32390
H          1.58870        3.31750        3.28480
C          4.46910        3.83160        0.75780
H          4.44750        1.71730        0.47940
C          3.91760        4.93500        1.41250
H          2.43550        5.58890        2.84050
H          5.27620        3.96970        0.04380
H          4.29400        5.93430        1.21400
C          0.83930       -4.49700        5.71450
H         -0.13990       -4.83840        5.35420
H          1.50090       -5.37070        5.72140
H          0.71210       -4.15620        6.74640
C          4.28990       -0.55860        1.64150
H          4.34930       -0.30080        0.58560
H          5.06070        0.02530        2.16280
H          4.55130       -1.61200        1.74670
H          1.58990        1.12210        3.05500
C          3.79360       -0.75720       -1.82870
C          4.83590       -1.71590       -1.80690
C          4.00970        0.55500       -2.30830
C          6.10250       -1.32490       -2.26160
C          5.29660        0.89330       -2.74910
C          6.33610       -0.03290       -2.72380
H          6.91110       -2.05030       -2.25100
H          5.47530        1.89750       -3.12290
H          7.32570        0.25080       -3.07050
C          4.64720       -3.13680       -1.32270
H          4.36080       -3.17490       -0.26630
H          3.86520       -3.66240       -1.88140
H          5.57720       -3.69990       -1.43840
C          2.92410        1.59930       -2.38510
H          2.07730        1.26460       -2.99240
H          2.53450        1.85990       -1.39560
H          3.30980        2.51810       -2.83520
H          0.85830       -2.82450       -2.43070
H          0.16860        0.08560       -3.02670
H          0.42840       -1.03830        1.38290
129
23_Intermediate_G
S          2.21110       -0.85650       -1.47500
C          3.64390       -1.93290       -1.18150
C          4.82440       -1.65240       -1.91130
C          3.58030       -3.00190       -0.25830
C          5.93630       -2.48110       -1.70770
C          4.72180       -3.80040       -0.09920
C          5.88890       -3.54710       -0.81390
H          6.84840       -2.28050       -2.26270
H          4.68610       -4.62860        0.60290
H          6.76120       -4.17890       -0.67310
C          4.95550       -0.50020       -2.88400
H          4.19370       -0.52840       -3.66780
H          4.86050        0.47050       -2.38410
H          5.93680       -0.52660       -3.36520
C          2.37290       -3.30690        0.59640
H          1.44220       -3.36090        0.02590
H          2.50630       -4.26330        1.10960
H          2.22950       -2.53430        1.36090
C         -0.27700       -1.48150       -2.70270
C          1.15970       -1.99340       -2.55420
C          1.83410       -2.14170       -3.93050
H          2.84040       -2.54900       -3.79590
H          1.94100       -1.14940       -4.38760
C         -1.08700       -2.34730       -3.67610
H         -2.08280       -1.90210       -3.77360
H         -1.21810       -3.33420       -3.21400
C         -0.40360       -2.49850       -5.03990
H         -1.00220       -3.16290       -5.67290
H         -0.36510       -1.52600       -5.54990
C          1.01700       -3.04530       -4.86710
H          1.52790       -3.11280       -5.83430
H          0.97540       -4.06390       -4.45720
O         -0.98610       -1.57750       -1.43280
P         -1.03370       -0.36200       -0.37970
O         -1.94180        0.69640       -1.23580
O         -2.01070       -0.92500        0.78550
C         -2.73500        1.65500       -0.57440
C         -3.33780       -1.31770        0.47800
C         -3.82970        1.13870        0.15040
C         -2.46780        3.02500       -0.69550
C         -4.20830       -0.30980        0.03000
C         -3.72990       -2.64940        0.69100
C         -4.59680        2.00880        0.95160
C         -3.30860        3.85560        0.06730
C         -1.43400        3.72210       -1.61400
C         -5.47900       -0.68200       -0.46410
C         -5.02330       -2.95480        0.24260
C         -2.87070       -3.70330        1.42970
C         -4.31930        3.39140        0.90400
C         -5.69140        1.51300        1.86900
H         -3.15790        4.92900        0.01590
C         -0.55290        4.67820       -0.77470
C         -0.48680        2.78280       -2.38460
C         -2.21650        4.54550       -2.67010
C         -5.87270       -2.03010       -0.36930
C         -6.41450        0.31380       -1.11170
H         -5.39220       -3.96640        0.35760
C         -2.42470       -3.14320        2.80370
C         -3.67420       -4.99290        1.70670
C         -1.63010       -4.10640        0.60190
C         -5.11900        4.37520        1.72690
H         -6.68520        1.81510        1.51400
H         -5.68790        0.42700        1.96870
H         -5.57260        1.94400        2.86970
H          0.00940        4.12960       -0.01110
H          0.17030        5.18140       -1.42600
H         -1.13780        5.45350       -0.27120
H          0.14120        2.19440       -1.70860
H         -1.02600        2.09690       -3.04280
H          0.18070        3.39250       -3.00440
H         -2.83750        3.89200       -3.29360
H         -2.87000        5.29180       -2.20770
H         -1.51480        5.07450       -3.32610
C         -7.21810       -2.48430       -0.88760
H         -6.74120       -0.05440       -2.09150
H         -7.32370        0.46460       -0.51550
H         -5.94490        1.28710       -1.25930
H         -1.84830       -3.90440        3.34310
H         -1.79830       -2.25460        2.70050
H         -3.29460       -2.88240        3.41770
H         -3.96690       -5.50760        0.78490
H         -3.04740       -5.68370        2.28100
H         -4.57710       -4.79700        2.29570
H         -1.92350       -4.49610       -0.37970
H         -0.95440       -3.26650        0.44320
H         -1.07630       -4.89390        1.12770
H         -4.81650        5.40350        1.50850
H         -4.98160        4.20900        2.80320
H         -6.19490        4.29160        1.53030
H         -7.30320       -2.33970       -1.97250
H         -8.04250       -1.92300       -0.43040
H         -7.37910       -3.54620       -0.68010
Ir         0.91810        0.28100        0.49990
H         -0.00390        1.06610        1.52550
H          0.72670       -0.96860        1.39220
C          2.29150        0.99660        2.45920
C          3.12140        1.29390        1.38670
C          2.37550       -0.06890        3.49000
C          1.20860       -0.34000        4.23460
C          3.55600       -0.74770        3.84280
C          1.20940       -1.27710        5.26350
H          0.29200        0.18970        3.98970
C          3.55690       -1.68390        4.87970
H          4.48970       -0.52910        3.34140
C          2.38620       -1.96050        5.58670
H          0.29490       -1.47020        5.81710
H          4.48260       -2.18980        5.13900
C          3.06280        2.66540        0.78940
C          2.88170        3.80110        1.60130
C          3.28300        2.87530       -0.58510
C          2.92830        5.08420        1.06030
H          2.75370        3.68360        2.67310
C          3.32150        4.16050       -1.12010
H          3.41890        2.02640       -1.24800
C          3.14970        5.29130       -0.30890
H          2.80970        5.94130        1.71860
H          3.49540        4.28740       -2.18580
H          2.39200       -2.69020        6.39130
C          3.18590        6.68240       -0.89360
H          3.85840        6.73670       -1.75600
H          2.18910        6.98830       -1.23860
H          3.51410        7.41940       -0.15380
C          4.33650        0.47540        1.01210
H          5.19790        0.84200        1.58790
H          4.21600       -0.58840        1.21420
H          4.59470        0.59940       -0.03990
H          1.59900        1.78420        2.73890
H          1.12770       -2.96020       -2.04490
H         -0.27870       -0.44030       -3.04540
129
23_Intermediate_H
S         -2.32930       -1.48040        0.64690
C          0.05360       -2.17180        2.11040
C         -1.31360       -2.71210        1.67470
C         -2.12020       -3.27180        2.85750
H         -3.05090       -3.71240        2.48810
H         -2.40340       -2.46000        3.53670
C          0.83200       -3.19450        2.94690
H          1.76470       -2.72550        3.27820
H          1.10710       -4.02610        2.28550
C          0.01590       -3.72580        4.13050
H          0.60270       -4.47980        4.66690
H         -0.18470       -2.91510        4.84480
C         -1.30960       -4.31800        3.64050
H         -1.91190       -4.67160        4.48510
H         -1.11260       -5.19040        3.00240
O          0.87690       -1.93780        0.93110
P          1.00830       -0.50620        0.20680
O          2.00840        0.23570        1.27020
O          1.93830       -0.85080       -1.08010
C          2.98550        1.16620        0.86560
C          3.17030       -1.52000       -0.88610
C          4.01880        0.66290        0.04610
C          2.95020        2.48900        1.32950
C          4.16420       -0.81270       -0.19240
C          3.35370       -2.80390       -1.42430
C          4.95440        1.55980       -0.50990
C          3.95520        3.32290        0.80820
C          2.01940        3.09270        2.40910
C          5.33580       -1.49870        0.20050
C          4.55930       -3.42010       -1.05870
C          2.37690       -3.47710       -2.41820
C          4.90900        2.91400       -0.11910
C          5.99320        1.12480       -1.51910
H          3.99010        4.35680        1.13520
C          1.42290        4.42990        1.90830
C          0.83730        2.20090        2.83120
C          2.87650        3.36150        3.67260
C          5.51450       -2.82770       -0.22820
C          6.38490       -0.86070        1.08260
H          4.76900       -4.41890       -1.42140
C          2.12860       -2.52870       -3.61800
C          2.96630       -4.78570       -2.98840
C          1.02880       -3.83890       -1.75400
C          5.89580        3.91840       -0.66890
H          7.00640        1.15630       -1.09770
H          5.81610        0.11390       -1.88760
H          5.99200        1.80230       -2.38060
H          0.81740        4.27850        1.00900
H          0.77530        4.85610        2.68370
H          2.18830        5.17660        1.67870
H          0.20840        1.93610        1.97580
H          1.16400        1.27620        3.31220
H          0.21720        2.75360        3.54670
H          3.30280        2.43000        4.06230
H          3.70250        4.04960        3.46520
H          2.25590        3.80760        4.45940
C          6.74510       -3.61210        0.16590
H          6.61150       -1.51110        1.93570
H          7.33010       -0.70890        0.54540
H          6.06330        0.10530        1.47400
H          1.46420       -3.01440       -4.34300
H          1.66430       -1.58980       -3.30710
H          3.06920       -2.29390       -4.12960
H          3.10880       -5.54900       -2.21520
H          2.27000       -5.19540       -3.72800
H          3.92510       -4.62040       -3.49210
H          1.18150       -4.48470       -0.88190
H          0.47880       -2.95570       -1.42950
H          0.40150       -4.38180       -2.47170
H          5.75980        4.89680       -0.19880
H          5.77730        4.05070       -1.75210
H          6.93370        3.60530       -0.50180
H          6.79810       -3.76310        1.25190
H          7.66880       -3.09670       -0.12520
H          6.74780       -4.59850       -0.30680
Ir        -0.91360        0.38990       -0.52030
H         -0.02830        1.40110       -1.36290
C         -2.55350        0.98290       -2.24940
C         -2.87690        1.86900       -1.22590
C         -3.35290       -0.14430       -2.80250
C         -2.68790       -1.17990       -3.48860
C         -4.75970       -0.15110       -2.80660
C         -3.39480       -2.20770       -4.10740
H         -1.60240       -1.17560       -3.53920
C         -5.46960       -1.17700       -3.43510
H         -5.31220        0.66280       -2.35280
C         -4.79270       -2.21530       -4.07660
H         -2.85520       -2.99780       -4.62160
H         -6.55570       -1.15460       -3.42970
C         -2.25270        3.22600       -1.18360
C         -1.78860        3.85200       -2.35960
C         -2.19370        3.97110        0.00890
C         -1.27960        5.14520       -2.33530
H         -1.85970        3.33840       -3.31290
C         -1.68380        5.26870        0.02580
H         -2.53600        3.53850        0.94360
C         -1.21820        5.88400       -1.14270
H         -0.94150        5.59880       -3.26370
H         -1.64940        5.81170        0.96660
H         -5.34700       -3.01320       -4.56220
C         -0.69900        7.30080       -1.13420
H         -0.48040        7.64130       -0.11760
H          0.21420        7.39400       -1.73240
H         -1.43620        7.99160       -1.56400
C         -4.07540        1.67420       -0.32490
H         -4.89670        2.31090       -0.68040
H         -4.42180        0.64330       -0.30850
H         -3.87060        1.97760        0.70330
H         -1.76440        1.30110       -2.92480
C         -3.76470       -1.06530        1.67410
C         -4.97110       -1.73380        1.35400
C         -3.70790       -0.10200        2.70730
C         -6.11960       -1.41330        2.09140
C         -4.88540        0.17940        3.41280
C         -6.08180       -0.46630        3.11040
H         -7.05180       -1.91960        1.85730
H         -4.85570        0.91590        4.21090
H         -6.98280       -0.23160        3.66990
C         -2.44790        0.63240        3.09620
H         -1.69540       -0.04030        3.52190
H         -1.98010        1.13800        2.24510
H         -2.66810        1.39110        3.85220
C         -5.07970       -2.77020        0.25690
H         -4.87060       -2.34150       -0.72880
H         -4.37650       -3.59730        0.40060
H         -6.09010       -3.18820        0.23490
H         -0.67110       -0.58930       -1.69620
H         -0.05990       -1.23630        2.66730
H         -1.12870       -3.51320        0.95180
129
23_Intermediate_I
S         -2.20950       -0.67470        1.40150
C         -3.54420       -1.83260        1.00170
C         -4.85370       -1.42870        1.36440
C         -3.30250       -3.06410        0.35120
C         -5.91680       -2.28610        1.05510
C         -4.40510       -3.88590        0.07390
C         -5.69830       -3.50540        0.41760
H         -6.92640       -1.98990        1.32570
H         -4.23480       -4.83580       -0.42540
H         -6.53650       -4.15720        0.18810
C         -5.15160       -0.12650        2.07550
H         -4.64560       -0.06960        3.04510
H         -4.82940        0.74430        1.49570
H         -6.22700       -0.03380        2.25170
C         -1.93340       -3.56880       -0.04090
H         -1.48370       -4.16420        0.76400
H         -2.00930       -4.21890       -0.91690
H         -1.23490       -2.76490       -0.28210
C          0.13930       -1.00220        2.92950
C         -1.25340       -1.60850        2.71790
C         -2.07560       -1.58790        4.02010
H         -3.04240       -2.06880        3.83870
H         -2.28070       -0.54590        4.29830
C          0.86590       -1.66360        4.10630
H          1.82850       -1.15870        4.23890
H          1.08160       -2.70250        3.82500
C          0.03670       -1.63530        5.39610
H          0.58630       -2.15270        6.19040
H         -0.09880       -0.59710        5.72950
C         -1.33320       -2.28470        5.17020
H         -1.94350       -2.22860        6.07880
H         -1.20480       -3.35080        4.93770
O          0.98550       -1.25110        1.76550
P          1.11180       -0.19710        0.55260
O          2.04880        0.92070        1.28760
O          2.08030       -0.95480       -0.50370
C          2.74200        1.85180        0.48880
C          3.45080       -1.20270       -0.25580
C          3.76690        1.31370       -0.31810
C          2.43710        3.21720        0.54400
C          4.27420       -0.07940       -0.06590
C          3.92760       -2.52390       -0.29460
C          4.36430        2.13170       -1.29760
C          3.10480        4.00170       -0.41440
C          1.54930        3.95230        1.57940
C          5.61770       -0.28300        0.32610
C          5.28140       -2.66580        0.04090
C          3.08560       -3.74530       -0.73500
C          4.00200        3.49520       -1.35170
C          5.36180        1.59490       -2.29850
H          2.90320        5.06820       -0.43980
C          0.43880        4.74680        0.85470
C          0.86860        3.05600        2.63470
C          2.45970        4.94210        2.35450
C          6.11230       -1.59920        0.38970
C          6.53280        0.86070        0.70210
H          5.71850       -3.65660        0.04630
C          2.44350       -3.47430       -2.11850
C          3.95960       -5.01000       -0.88640
C          1.98620       -4.07190        0.30020
C          4.60610        4.41940       -2.38390
H          6.36460        2.01060       -2.13510
H          5.43960        0.50760       -2.26120
H          5.06870        1.87710       -3.31650
H         -0.23460        4.07060        0.31800
H         -0.15770        5.30590        1.58540
H          0.84150        5.46620        0.13490
H          0.13590        2.37740        2.18980
H          1.59130        2.46270        3.20150
H          0.33350        3.70070        3.34190
H          3.25520        4.40700        2.88540
H          2.92980        5.67720        1.69430
H          1.86560        5.48990        3.09540
C          7.54070       -1.87560        0.80090
H          7.01760        0.65830        1.66420
H          7.33830        0.99360       -0.03190
H          6.00000        1.80810        0.78880
H          1.89070       -4.36200       -2.44880
H          1.74680       -2.63440       -2.09330
H          3.21340       -3.25980       -2.86910
H          4.39420       -5.33260        0.06610
H          3.33340       -5.83060       -1.25320
H          4.77240       -4.86580       -1.60680
H          2.42500       -4.27460        1.28420
H          1.27230       -3.25660        0.41260
H          1.43630       -4.96730       -0.01510
H          4.26520        5.44790       -2.23430
H          4.33070        4.12200       -3.40400
H          5.70230        4.41830       -2.34090
H          7.73290       -1.56110        1.83480
H          8.25910       -1.33760        0.16990
H          7.76700       -2.94350        0.73140
Ir        -0.79600        0.27260       -0.53500
H          0.11570        0.98170       -1.62410
C         -2.64120        0.06030       -1.98670
H         -3.43630       -0.18900       -1.28860
C         -2.43380        1.42230       -2.19810
C         -2.29190       -1.08810       -2.87610
C         -3.29570       -2.05790       -3.07410
C         -1.04770       -1.28750       -3.51070
C         -3.08170       -3.15840       -3.90080
H         -4.25720       -1.93600       -2.58360
C         -0.83090       -2.40000       -4.32660
H         -0.23710       -0.58410       -3.35250
C         -1.84630       -3.33480       -4.53170
H         -3.87910       -3.88090       -4.05000
H          0.13710       -2.53120       -4.80130
H         -1.67710       -4.19520       -5.17250
C         -3.22850        2.42680       -1.43130
C         -2.72500        3.72090       -1.20470
C         -4.53630        2.15220       -0.99030
C         -3.47770        4.67950       -0.53160
H         -1.72900        3.98270       -1.54500
C         -5.28880        3.11920       -0.32690
H         -4.99140        1.18940       -1.19950
C         -4.77210        4.39770       -0.07220
H         -3.05300        5.66600       -0.36330
H         -6.30240        2.88000       -0.01500
C         -5.57700        5.43000        0.67910
H         -5.42320        5.33280        1.76210
H         -5.28490        6.44710        0.39910
H         -6.64970        5.31510        0.49250
C         -1.68350        1.97290       -3.39100
H         -1.20950        1.19370       -3.98470
H         -2.40670        2.50090       -4.02570
H         -0.92000        2.69900       -3.10240
H         -0.81760        1.67140        0.13400
H         -1.12610       -2.63450        2.36400
H          0.06530        0.07800        3.09830
129
23_Intermediate_J
S          1.89810       -1.80520       -0.52190
C         -0.13720       -1.58700       -2.51350
C          0.96090       -2.52810       -2.00390
C          1.90750       -2.99580       -3.12040
H          2.60970       -3.73070       -2.71570
H          2.50600       -2.15520       -3.48610
C         -0.86690       -2.15940       -3.73380
H         -1.57930       -1.40740       -4.08990
H         -1.45320       -3.02470       -3.39860
C          0.10190       -2.58910       -4.84160
H         -0.46600       -3.02250       -5.67220
H          0.62790       -1.71130       -5.24180
C          1.12120       -3.59590       -4.29840
H          1.82910       -3.89160       -5.08100
H          0.60320       -4.50930       -3.97540
O         -1.16160       -1.44710       -1.48170
P         -1.18580       -0.22340       -0.43570
O         -1.87650        0.90930       -1.39030
O         -2.33730       -0.66060        0.62190
C         -2.60510        1.97090       -0.81960
C         -3.66660       -0.88920        0.18930
C         -3.80300        1.60750       -0.16770
C         -2.17110        3.29620       -0.95000
C         -4.35980        0.22030       -0.32140
C         -4.23440       -2.16410        0.34470
C         -4.49770        2.57750        0.58220
C         -2.92450        4.23260       -0.21860
C         -1.01180        3.83840       -1.82220
C         -5.62170        0.01320       -0.92280
C         -5.51120       -2.30420       -0.21810
C         -3.58450       -3.31100        1.15480
C         -4.02800        3.90820        0.56570
C         -5.71030        2.23870        1.41910
H         -2.62370        5.27490       -0.24950
C          0.07420        4.44380       -0.90280
C         -0.33880        2.80350       -2.74770
C         -1.57250        4.95020       -2.74840
C         -6.18640       -1.27560       -0.88010
C         -6.36950        1.12360       -1.62570
H         -6.01060       -3.26330       -0.15440
C         -3.29430       -2.81400        2.59350
C         -4.53100       -4.52520        1.27370
C         -2.27610       -3.81890        0.50690
C         -4.72640        4.98990        1.35730
H         -6.62220        2.69530        1.01270
H         -5.87760        1.16340        1.49070
H         -5.59190        2.62930        2.43640
H          0.48200        3.67520       -0.23740
H          0.89620        4.85110       -1.50420
H         -0.32040        5.25420       -0.28120
H          0.20260        2.03710       -2.19010
H         -1.06150        2.30610       -3.40160
H          0.38650        3.32600       -3.38240
H         -2.35040        4.55210       -3.40980
H         -1.99910        5.78880       -2.19120
H         -0.76530        5.34740       -3.37470
C         -7.53150       -1.55570       -1.51040
H         -6.69590        0.79450       -2.61900
H         -7.27610        1.41230       -1.07780
H         -5.75740        2.01740       -1.75320
H         -2.85480       -3.62550        3.18630
H         -2.59660       -1.97310        2.60230
H         -4.21960       -2.49860        3.08960
H         -4.74400       -4.98140        0.30030
H         -4.05200       -5.28890        1.89600
H         -5.48270       -4.26180        1.74800
H         -2.44440       -4.13260       -0.52940
H         -1.49520       -3.05880        0.50790
H         -1.90480       -4.68550        1.06750
H         -4.26440        5.96510        1.17810
H         -4.68400        4.79400        2.43650
H         -5.78830        5.06690        1.09300
H         -7.50550       -1.41670       -2.59900
H         -8.31000       -0.88510       -1.12610
H         -7.84830       -2.58440       -1.31510
Ir         0.70700        0.16220        0.69190
H         -0.11030        1.25920        1.48950
C          2.40600        0.07230        2.35240
H          3.13600       -0.56980        1.86410
C          2.56530        1.43250        2.09990
C          1.64050       -0.62910        3.41610
C          1.42200       -2.01480        3.24320
C          1.18110       -0.03350        4.60990
C          0.74050       -2.76540        4.20080
H          1.79850       -2.50360        2.34970
C          0.50840       -0.78900        5.56740
H          1.38250        1.00910        4.81690
C          0.27370       -2.15300        5.36470
H          0.58620       -3.82850        4.04090
H          0.17490       -0.31100        6.48400
H         -0.25240       -2.73390        6.11650
C          3.73750        1.88180        1.29430
C          3.67370        3.00760        0.45280
C          4.98430        1.24690        1.44070
C          4.80020        3.45990       -0.22760
H          2.73100        3.52340        0.30360
C          6.11190        1.71370        0.76820
H          5.08590        0.40270        2.11560
C          6.04430        2.82750       -0.07870
H          4.71350        4.32250       -0.88360
H          7.06250        1.20630        0.91180
C          7.27390        3.35100       -0.78050
H          7.02180        3.80920       -1.74260
H          7.77260        4.12020       -0.17580
H          8.00300        2.55410       -0.95850
C          1.82860        2.54260        2.81630
H          0.86820        2.23170        3.22250
H          2.46320        2.90650        3.63680
H          1.65800        3.39210        2.15140
C          3.63850       -1.69020       -1.01010
C          4.49500       -2.70910       -0.52530
C          4.12390       -0.63820       -1.81960
C          5.85330       -2.64290       -0.86360
C          5.48920       -0.62760       -2.13440
C          6.34870       -1.61500       -1.66080
H          6.52320       -3.41700       -0.50020
H          5.87560        0.17220       -2.75950
H          7.40410       -1.58580       -1.91670
C          4.01800       -3.86990        0.32080
H          3.21170       -4.42880       -0.16570
H          4.84340       -4.56310        0.50540
H          3.63660       -3.54270        1.29420
C          3.24800        0.46090       -2.36790
H          2.49060        0.07640       -3.06000
H          2.71980        0.98540       -1.56760
H          3.85100        1.19140       -2.91330
H          1.02010        1.28890       -0.32340
H          0.46330       -3.39910       -1.56590
H          0.27960       -0.60130       -2.74370
129
23_Intermediate_K
S         -2.31490       -0.09380        1.57600
C         -3.69300       -1.24620        1.33900
C         -4.97290       -0.80440        1.75230
C         -3.49870       -2.51820        0.75170
C         -6.05600       -1.67640        1.57630
C         -4.61680       -3.35100        0.60820
C         -5.88340       -2.93800        1.01360
H         -7.04470       -1.35440        1.89070
H         -4.48390       -4.33490        0.16700
H         -6.73590       -3.59980        0.89040
C         -5.22530        0.55630        2.36430
H         -4.64190        0.71100        3.27710
H         -4.96460        1.36390        1.67290
H         -6.28340        0.66100        2.61980
C         -2.16410       -3.01440        0.24600
H         -1.35380       -2.88460        0.96690
H         -2.22480       -4.07930        0.00400
H         -1.86920       -2.49030       -0.67110
C          0.03520       -0.37160        3.13660
C         -1.40620       -0.88550        3.02180
C         -2.20300       -0.60040        4.30880
H         -3.20630       -1.02650        4.20910
H         -2.32110        0.48470        4.42490
C          0.72310       -0.90210        4.40040
H          1.72530       -0.46350        4.44990
H          0.84960       -1.98610        4.28220
C         -0.08110       -0.60820        5.67260
H          0.43630       -1.04200        6.53550
H         -0.12690        0.47630        5.84360
C         -1.50150       -1.17000        5.55110
H         -2.09300       -0.92480        6.44060
H         -1.46290       -2.26610        5.48690
O          0.84440       -0.86610        2.02560
P          1.03150       -0.04100        0.65420
O          2.01770        1.14280        1.20140
O          1.96920       -1.01200       -0.24480
C          2.78000        1.87380        0.26790
C          3.31450       -1.29740        0.09660
C          3.79840        1.14390       -0.38130
C          2.55010        3.23820        0.05010
C          4.20270       -0.20890        0.13400
C          3.70590       -2.63150        0.29890
C          4.48190        1.73390       -1.46310
C          3.30040        3.79530       -1.00190
C          1.65430        4.20070        0.86950
C          5.51430       -0.42000        0.61800
C          5.03400       -2.79250        0.71880
C          2.80570       -3.85880        0.02120
C          4.20580        3.08080       -1.78210
C          5.48270        0.97090       -2.30050
H          3.16120        4.84620       -1.23440
C          0.63440        4.88870       -0.06900
C          0.87140        3.56020        2.03370
C          2.57430        5.28220        1.49620
C          5.91890       -1.73230        0.92600
C          6.48620        0.71770        0.83680
H          5.40470       -3.79170        0.91060
C          2.25130       -3.78820       -1.42370
C          3.59770       -5.18000        0.13480
C          1.63870       -3.94210        1.02990
C          4.90750        3.76710       -2.93150
H          6.50010        1.36300       -2.17360
H          5.50030       -0.09200       -2.05710
H          5.24120        1.06930       -3.36540
H         -0.00630        4.14690       -0.55810
H         -0.00540        5.56830        0.50620
H          1.12060        5.47700       -0.85340
H          0.12270        2.84290        1.68740
H          1.53090        3.05470        2.74460
H          0.34100        4.35420        2.57220
H          3.29980        4.82780        2.18060
H          3.13030        5.84320        0.73910
H          1.97060        5.99800        2.06650
C          7.30940       -2.01620        1.44670
H          6.92550        0.65470        1.83900
H          7.32170        0.67970        0.12580
H          6.00960        1.69390        0.74030
H          1.64180       -4.67670       -1.62860
H          1.62820       -2.90640       -1.58620
H          3.07030       -3.76830       -2.15240
H          3.96660       -5.35730        1.15110
H          2.93390       -6.01300       -0.12120
H          4.44990       -5.21170       -0.55310
H          2.01390       -3.99460        2.05860
H          0.97310       -3.08260        0.95900
H          1.04970       -4.84720        0.83820
H          4.61660        4.81960       -2.99460
H          4.66600        3.29590       -3.89300
H          5.99860        3.72530       -2.82570
H          7.47920       -1.54880        2.42540
H          8.08440       -1.62800        0.77430
H          7.47170       -3.09200        1.56040
Ir        -0.86820        0.42160       -0.49970
H          0.14470        0.94380       -1.60570
C         -2.03350        0.67790       -2.55930
C         -2.95550        0.81320       -1.51190
C         -1.80100       -0.68020       -3.15500
C         -0.55110       -1.03260       -3.70590
C         -2.84340       -1.62070       -3.25140
C         -0.35400       -2.27360       -4.30320
H          0.27970       -0.33660       -3.64930
C         -2.64060       -2.85820       -3.86000
H         -3.83260       -1.37550       -2.87820
C         -1.39450       -3.21160       -4.39480
H          0.62480       -2.51830       -4.70790
H         -3.47010       -3.55740       -3.92860
C         -1.60260        1.85090       -3.41570
H         -0.59880        1.71370       -3.82200
H         -2.29530        1.91500       -4.26630
H         -1.63430        2.79810       -2.88000
H         -3.46340       -0.10240       -1.21630
C         -3.73560        2.03420       -1.15430
C         -3.19120        3.29370       -0.85480
C         -5.13670        1.90060       -1.14240
C         -4.01660        4.38320       -0.57450
H         -2.11580        3.42360       -0.81990
C         -5.96350        2.99100       -0.86860
H         -5.58220        0.93270       -1.35870
C         -5.40590        4.23930       -0.58430
H         -3.56930        5.34580       -0.34250
H         -7.04210        2.86160       -0.87330
H         -6.04620        5.08890       -0.36500
C         -1.17940       -4.54270       -5.07260
H         -1.13360       -4.42390       -6.16290
H         -0.23430       -5.00020       -4.75990
H         -1.99060       -5.24200       -4.84940
H         -0.79810        1.89120       -0.02400
H          0.05500        0.72410        3.13860
H         -1.37160       -1.96150        2.83190
129
23_Intermediate_L
S         -2.19880       -1.30060        0.90150
C         -0.14130       -0.96990        2.86220
C         -1.36720       -1.82430        2.52370
C         -2.36510       -1.90960        3.68930
H         -3.17600       -2.59450        3.42410
H         -2.82250       -0.93080        3.86750
C          0.51010       -1.40080        4.18080
H          1.33370       -0.71210        4.39710
H          0.95160       -2.39390        4.02810
C         -0.49920       -1.45390        5.33410
H          0.00590       -1.80140        6.24210
H         -0.87730       -0.44480        5.54930
C         -1.66900       -2.37730        4.97890
H         -2.40570       -2.39870        5.78990
H         -1.30340       -3.40550        4.85300
O          0.88390       -1.17380        1.84030
P          1.05720       -0.21350        0.55990
O          1.95600        0.96530        1.26920
O          2.07700       -1.03160       -0.39940
C          2.67130        1.85360        0.43960
C          3.44360       -1.22670       -0.08670
C          3.69150        1.28480       -0.34300
C          2.40440        3.23290        0.47650
C          4.23470       -0.07110        0.01170
C          3.94850       -2.53350        0.02480
C          4.28000        2.06320       -1.36350
C          3.04850        3.97530       -0.52480
C          1.62630        3.92870        1.61980
C          5.57420       -0.19920        0.44810
C          5.29580       -2.60640        0.40540
C          3.15410       -3.81130       -0.33450
C          3.91300        3.41860       -1.47240
C          5.27650        1.48130       -2.34010
H          2.87040        5.04240       -0.58180
C          0.14630        3.50160        1.70450
C          2.33030        3.58410        2.95750
C          1.64610        5.46450        1.46630
C          6.09570       -1.48950        0.65640
C          6.45440        0.99870        0.72660
H          5.75420       -3.57990        0.52730
C          2.68930       -3.71520       -1.80850
C          4.02770       -5.07840       -0.21100
C          1.92920       -4.01670        0.58540
C          4.49270        4.29550       -2.55840
H          6.27370        1.92230       -2.21340
H          5.37200        0.39960       -2.23470
H          4.96930        1.69370       -3.37100
H          0.04090        2.43670        1.91640
H         -0.34850        4.05240        2.51360
H         -0.38780        3.72590        0.77510
H          2.32010        2.50840        3.15450
H          3.37320        3.92090        2.94660
H          1.82090        4.08700        3.78830
H          2.66500        5.86590        1.45680
H          1.13510        5.79420        0.55450
H          1.12250        5.91340        2.31740
C          7.51930       -1.68800        1.12460
H          6.93220        0.89930        1.70790
H          7.26520        1.08490       -0.00870
H          5.89680        1.93560        0.71920
H          2.14290       -4.62460       -2.08700
H          2.02890       -2.86000       -1.96930
H          3.54890       -3.61840       -2.48200
H          4.36720       -5.24770        0.81710
H          3.43220       -5.94850       -0.50780
H          4.90640       -5.04270       -0.86420
H          2.22840       -4.04020        1.63950
H          1.18520       -3.23060        0.46320
H          1.45140       -4.97520        0.34830
H          4.14450        5.32740       -2.45560
H          4.20530        3.94440       -3.55790
H          5.58950        4.30640       -2.53260
H          7.67850       -1.27090        2.12760
H          8.24030       -1.19490        0.46090
H          7.77230       -2.75150        1.16440
Ir        -0.80890        0.27570       -0.63300
H          0.16000        1.13340       -1.54870
C         -1.98700        0.49470       -2.65360
C         -2.84280        0.97230       -1.65550
C         -1.94400       -0.97540       -2.92810
C         -0.73660       -1.59750       -3.30350
C         -3.10700       -1.77410       -2.87340
C         -0.69330       -2.96440       -3.58960
H          0.17500       -1.01330       -3.37770
C         -3.05570       -3.12720       -3.18020
H         -4.06240       -1.32050       -2.62840
C         -1.84640       -3.75290       -3.53740
H          0.25330       -3.41650       -3.87100
H         -3.97200       -3.71200       -3.15740
C         -1.37650        1.37350       -3.72610
H         -0.36630        1.05660       -3.99340
H         -1.99870        1.27310       -4.62600
H         -1.34890        2.42510       -3.44850
H         -3.51290        0.24400       -1.20620
C         -3.29810        2.37320       -1.45060
C         -2.45480        3.49910       -1.43820
C         -4.67720        2.57490       -1.25990
C         -2.97880        4.78100       -1.27110
H         -1.38150        3.37120       -1.52890
C         -5.20120        3.85780       -1.09660
H         -5.34560        1.71810       -1.24720
C         -4.35380        4.96730       -1.10510
H         -2.30790        5.63550       -1.26170
H         -6.27090        3.98750       -0.95860
H         -4.75840        5.96680       -0.97360
C         -1.81240       -5.22340       -3.87300
H         -2.43860       -5.44170       -4.74680
H         -0.79560       -5.56050       -4.09350
H         -2.19970       -5.82680       -3.04340
C         -3.90980       -0.86300        1.30160
C         -4.88550       -1.84870        1.01310
C         -4.26660        0.40000        1.83000
C         -6.23130       -1.53100        1.23950
C         -5.62790        0.66140        2.03940
C         -6.60280       -0.28750        1.74290
H         -6.99050       -2.27670        1.02140
H         -5.91860        1.62670        2.44380
H         -7.65160       -0.05980        1.91130
C         -4.54110       -3.22960        0.50130
H         -4.00130       -3.19420       -0.44970
H         -3.90470       -3.77440        1.20830
H         -5.45340       -3.81470        0.35510
C         -3.26510        1.46830        2.19410
H         -2.64020        1.74520        1.34160
H         -3.78020        2.36720        2.54280
H         -2.59240        1.14330        2.99610
H         -0.90480        1.60500        0.14650
H         -1.00560       -2.83000        2.28650
H         -0.41040        0.09040        2.90200
129
23_Intermediate_M
S         -2.37610       -0.12820        1.64570
C         -3.93490       -0.91120        1.15010
C         -5.12350       -0.43200        1.75310
C         -3.95170       -1.96210        0.20580
C         -6.33260       -1.04250        1.39230
C         -5.18790       -2.54370       -0.10640
C         -6.36800       -2.09100        0.47690
H         -7.25420       -0.68780        1.84490
H         -5.21700       -3.35770       -0.82530
H         -7.31570       -2.55400        0.21720
C         -5.15730        0.70120        2.75710
H         -4.57310        0.47550        3.65420
H         -4.75280        1.63040        2.34310
H         -6.18760        0.89390        3.06830
C         -2.71490       -2.47460       -0.49290
H         -1.91890       -2.75150        0.20300
H         -2.95660       -3.36000       -1.08740
H         -2.30270       -1.72210       -1.17580
C         -0.16500       -1.38030        2.93230
C         -1.68680       -1.46440        2.78780
C         -2.38370       -1.34590        4.15600
H         -3.46120       -1.47640        4.01850
H         -2.22570       -0.33500        4.55290
C          0.36630       -2.38060        3.96570
H          1.44800       -2.23430        4.05370
H          0.20790       -3.39140        3.56810
C         -0.33130       -2.24030        5.32390
H          0.05670       -3.00070        6.01060
H         -0.09440       -1.26310        5.76710
C         -1.84870       -2.37750        5.16150
H         -2.35620       -2.23580        6.12250
H         -2.09460       -3.39200        4.81900
O          0.47960       -1.74610        1.67310
P          0.90290       -0.62010        0.60250
O          2.22490       -0.03060        1.36060
O          1.46380       -1.47700       -0.65220
C          3.08350        0.80510        0.61710
C          2.71990       -2.13060       -0.67320
C          3.77700        0.17030       -0.43480
C          3.23700        2.15880        0.94020
C          3.86040       -1.33020       -0.48220
C          2.77150       -3.50430       -0.96820
C          4.47560        0.96230       -1.36750
C          3.99980        2.89360        0.01380
C          2.76730        2.89160        2.22240
C          5.12080       -1.96280       -0.36640
C          4.05370       -4.06790       -0.90940
C          1.55010       -4.36250       -1.37440
C          4.56400        2.35270       -1.13940
C          5.11740        0.37630       -2.60420
H          4.15060        3.95320        0.19480
C          1.92890        4.13670        1.85130
C          1.93410        2.04770        3.20780
C          4.04020        3.34560        2.98560
C          5.20470       -3.35130       -0.57830
C          6.37720       -1.20480        0.00140
H          4.17130       -5.12440       -1.11600
C          0.78450       -3.69280       -2.54240
C          1.97730       -5.76210       -1.87040
C          0.61060       -4.57550       -0.16620
C          5.30090        3.25200       -2.10510
H          6.21170        0.45400       -2.56960
H          4.86020       -0.67440       -2.74450
H          4.79360        0.92470       -3.49660
H          1.01910        3.85490        1.31100
H          1.63140        4.66690        2.76380
H          2.48210        4.84270        1.22540
H          0.97050        1.75450        2.78190
H          2.46010        1.14590        3.53200
H          1.72860        2.65630        4.09620
H          4.64900        2.48250        3.27890
H          4.66650        4.01140        2.38390
H          3.75530        3.88570        3.89640
C          6.52730       -4.07660       -0.47920
H          6.89980       -1.71310        0.82000
H          7.08310       -1.15780       -0.83800
H          6.16900       -0.18340        0.32090
H         -0.04900       -4.33410       -2.85320
H          0.37790       -2.71800       -2.26860
H          1.44340       -3.55780       -3.40860
H          2.45220       -6.35710       -1.08280
H          1.08530       -6.30810       -2.19610
H          2.66280       -5.70630       -2.72340
H          1.13570       -5.09450        0.64450
H          0.23130       -3.63440        0.23080
H         -0.24500       -5.19410       -0.46370
H          5.31660        4.28440       -1.74390
H          4.83060        3.25230       -3.09690
H          6.33980        2.93040       -2.25010
H          6.93760       -4.03560        0.53820
H          7.28390       -3.63800       -1.14140
H          6.41510       -5.13070       -0.74900
Ir        -0.71040        0.74490       -0.16400
H          0.46490        1.28690       -1.08590
C         -2.62720        1.86450       -1.29660
C         -1.46800        2.59490       -1.57200
C         -3.08690        0.86100       -2.31940
C         -4.45250        0.54500       -2.44270
C         -2.20860        0.24020       -3.23860
C         -4.91290       -0.32860       -3.42760
H         -5.18420        1.00010       -1.78650
C         -2.67300       -0.64270       -4.20800
H         -1.14150        0.43760       -3.20340
C         -4.03740       -0.94700       -4.32680
H         -5.97930       -0.52880       -3.49490
H         -1.96010       -1.09840       -4.89090
C         -0.98960        3.92710       -1.12780
C          0.14020        4.42270       -1.81360
C         -1.58930        4.76920       -0.17000
C          0.64960        5.69360       -1.56260
H          0.62070        3.79580       -2.56050
C         -1.07740        6.04270        0.08180
H         -2.46710        4.45830        0.37670
C          0.04060        6.51330       -0.60950
H          1.51780        6.04380       -2.11350
H         -1.56510        6.67240        0.82060
H          0.42960        7.50780       -0.41080
C         -4.53360       -1.91390       -5.37390
H         -4.35700       -2.95320       -5.06670
H         -5.60830       -1.79980       -5.54570
H         -4.01590       -1.76890       -6.32850
C         -3.65180        2.33790       -0.28540
H         -3.18330        2.68510        0.63420
H         -4.24060        3.16570       -0.70290
H         -4.34420        1.54170       -0.01660
H         -0.97030        2.31200       -2.49280
H         -0.22900        1.84120        0.81830
H         -1.93420       -2.42170        2.32150
H          0.13760       -0.36560        3.21260
129
23_Intermediate_N
S          2.20780       -1.78970       -0.36240
C          0.21150       -1.90770       -2.42690
C          1.34160       -2.71410       -1.77740
C          2.34160       -3.24370       -2.81740
H          3.09230       -3.86490       -2.32070
H          2.87800       -2.40870       -3.28170
C         -0.46510       -2.69210       -3.55720
H         -1.22010       -2.04560       -4.01720
H         -0.99790       -3.53840       -3.10480
C          0.54170       -3.20680       -4.59300
H          0.01280       -3.79450       -5.35140
H          1.00730       -2.36060       -5.11720
C          1.62550       -4.05030       -3.91310
H          2.36790       -4.38950       -4.64440
H          1.17420       -4.95140       -3.47570
O         -0.83800       -1.66670       -1.44440
P         -0.93850       -0.33100       -0.55360
O         -1.59140        0.67330       -1.66750
O         -2.14600       -0.67290        0.47770
C         -2.29730        1.81120       -1.22880
C         -3.45850       -0.91350        0.00260
C         -3.51530        1.54810       -0.56630
C         -1.82020        3.10370       -1.48110
C         -4.11000        0.16850       -0.61230
C         -4.05540       -2.16640        0.22020
C         -4.18890        2.60510        0.07640
C         -2.55040        4.12760       -0.84990
C         -0.64970        3.52370       -2.40520
C         -5.35960       -0.05490       -1.23370
C         -5.31580       -2.32170       -0.37460
C         -3.46470       -3.26340        1.13800
C         -3.67270        3.91260       -0.05400
C         -5.42780        2.38350        0.91340
H         -2.21630        5.15270       -0.97590
C          0.45340        4.21200       -1.56750
C         -0.00190        2.37910       -3.21110
C         -1.19830        4.53260       -3.44950
C         -5.95210       -1.32680       -1.12050
C         -6.06640        1.01740       -2.03180
H         -5.83470       -3.26620       -0.26640
C         -3.31380       -2.68070        2.56520
C         -4.40240       -4.48600        1.23710
C         -2.09500       -3.78400        0.64560
C         -4.34430        5.08360        0.62580
H         -6.31310        2.84120        0.45310
H         -5.63880        1.32450        1.06610
H         -5.31170        2.84970        1.89890
H          0.88090        3.51910       -0.83510
H          1.26340        4.55650       -2.22190
H          0.07000        5.08280       -1.02510
H          0.52890        1.67090       -2.57230
H         -0.73710        1.82470       -3.80220
H          0.72940        2.81260       -3.90340
H         -1.98210        4.07230       -4.06190
H         -1.61490        5.43280       -2.98890
H         -0.38730        4.84760       -4.11650
C         -7.28560       -1.62300       -1.76800
H         -6.37040        0.62740       -3.01000
H         -6.98310        1.35570       -1.53100
H         -5.43590        1.89120       -2.20040
H         -2.91870       -3.44830        3.24180
H         -2.62950       -1.82910        2.58550
H         -4.28440       -2.35410        2.95620
H         -4.53980       -4.98130        0.26910
H         -3.95950       -5.21780        1.92140
H         -5.38860       -4.22100        1.63330
H         -2.15470       -4.13830       -0.38930
H         -1.31980       -3.01970        0.69810
H         -1.78060       -4.62610        1.27420
H         -3.84450        6.02280        0.37180
H         -4.32740        4.98120        1.71860
H         -5.39830        5.17360        0.33480
H         -7.22990       -1.55160       -2.86210
H         -8.06090       -0.91680       -1.44590
H         -7.62610       -2.63210       -1.51830
Ir         0.87610        0.28510        0.61600
H         -0.05210        1.44560        1.15870
C          2.40750        0.46080        2.49000
C          2.35220        1.74820        1.95770
C          1.28100       -0.01850        3.35410
C          1.00810       -1.40000        3.47930
C          0.49750        0.86890        4.13030
C          0.00250       -1.86340        4.32870
H          1.59100       -2.12010        2.91400
C         -0.49080        0.39590        4.98020
H          0.69980        1.93460        4.10490
C         -0.76170       -0.98020        5.09790
H         -0.17760       -2.93250        4.40140
H         -1.05400        1.10350        5.58330
C          3.39850        2.56690        1.31480
C          3.18250        3.96150        1.31660
C          4.58570        2.08740        0.72660
C          4.11530        4.84200        0.77390
H          2.27050        4.35580        1.75760
C          5.51580        2.96980        0.17780
H          4.78760        1.02690        0.67040
C          5.29020        4.34820        0.20170
H          3.92350        5.91090        0.79590
H          6.42080        2.57340       -0.27360
H          6.01990        5.02980       -0.22600
C         -1.84180       -1.47430        6.02710
H         -2.83700       -1.27830        5.60760
H         -1.76060       -2.55130        6.20070
H         -1.79520       -0.96430        6.99570
C          3.69270       -0.35040        2.53090
H          4.03200       -0.69730        1.55490
H          4.49150        0.27500        2.94760
H          3.58510       -1.22100        3.17850
H          1.51130        2.35610        2.26890
C          3.94650       -1.64650       -0.85860
C          4.83490       -2.60470       -0.30920
C          4.40520       -0.62740       -1.72500
C          6.19560       -2.50420       -0.62870
C          5.77610       -0.57760       -2.01440
C          6.66600       -1.49960       -1.46950
H          6.88770       -3.23090       -0.21330
H          6.14200        0.19740       -2.68200
H          7.72420       -1.43980       -1.70730
C          4.38440       -3.73300        0.59250
H          3.94590       -3.36290        1.52510
H          3.62650       -4.36210        0.11340
H          5.23480       -4.36990        0.85100
C          3.50020        0.40190       -2.35530
H          2.66660       -0.05680       -2.89550
H          3.06930        1.06960       -1.60270
H          4.05980        1.01460       -3.06740
H          1.22660        1.22390       -0.56660
H          0.88040       -3.55910       -1.25630
H          0.58400       -0.95010       -2.80330
129
23_Intermediate_O
S         -2.31770       -0.66940        1.48300
C         -3.86980       -1.52540        1.08600
C         -5.02890       -1.13630        1.80450
C         -3.91170       -2.54850        0.11390
C         -6.23050       -1.79550        1.51890
C         -5.14080       -3.18340       -0.12130
C         -6.29000       -2.81160        0.56670
H         -7.12780       -1.50820        2.05960
H         -5.18460       -3.97710       -0.86240
H         -7.23200       -3.31410        0.36600
C         -5.03290       -0.05330        2.86180
H         -4.35280       -0.28270        3.68800
H         -4.72520        0.91710        2.45980
H         -6.03820        0.06080        3.27670
C         -2.72740       -2.99430       -0.71140
H         -1.76720       -2.70610       -0.28430
H         -2.73340       -4.08330       -0.82670
H         -2.78160       -2.56300       -1.71680
C          0.06030       -1.83670        2.54760
C         -1.45350       -2.04440        2.44370
C         -2.08490       -2.15000        3.84410
H         -3.15760       -2.33980        3.74110
H         -1.97200       -1.18900        4.36260
C          0.71480       -2.93360        3.39580
H          1.78650       -2.71810        3.46050
H          0.60680       -3.88490        2.85870
C          0.08240       -3.04360        4.78860
H          0.55520       -3.86550        5.33760
H          0.28060       -2.12630        5.36000
C         -1.43030       -3.26320        4.67820
H         -1.89190       -3.28400        5.67210
H         -1.63120       -4.23890        4.21460
O          0.68440       -1.93850        1.23050
P          0.94860       -0.62740        0.32970
O          2.00700        0.14100        1.31020
O          1.82070       -1.18470       -0.91680
C          2.84590        1.13640        0.77070
C          3.13230       -1.69280       -0.74680
C          3.81160        0.67590       -0.14930
C          2.73720        2.47390        1.17260
C          4.10050       -0.79520       -0.26570
C          3.41220       -3.01520       -1.12890
C          4.55780        1.61630       -0.88660
C          3.54530        3.36650        0.44420
C          1.92660        3.05520        2.35910
C          5.38100       -1.29480        0.06600
C          4.71420       -3.44390       -0.83450
C          2.42260       -3.93110       -1.88790
C          4.39660        2.98700       -0.59040
C          5.50740        1.20770       -1.98930
H          3.49890        4.42240        0.69100
C          0.96780        4.15900        1.85520
C          1.08910        2.03730        3.15840
C          2.93960        3.67860        3.35650
C          5.67460       -2.64310       -0.21240
C          6.43500       -0.43770        0.73000
H          5.00100       -4.45720       -1.08650
C          1.92680       -3.21440       -3.16890
C          3.09900       -5.24450       -2.33810
C          1.21560       -4.31980       -1.00520
C          5.16580        4.04240       -1.35120
H          6.55180        1.41540       -1.72290
H          5.42770        0.14700       -2.23030
H          5.29860        1.77770       -2.90220
H          0.23770        3.75610        1.14560
H          0.41870        4.58850        2.70150
H          1.49990        4.97560        1.35760
H          0.27860        1.61340        2.56040
H          1.69800        1.21880        3.55270
H          0.63240        2.55670        4.00900
H          3.62390        2.91590        3.74600
H          3.54100        4.46910        2.89770
H          2.40140        4.11750        4.20500
C          7.02630       -3.23050        0.12420
H          6.83900       -0.94760        1.61230
H          7.28470       -0.24980        0.06090
H          6.04280        0.52760        1.05180
H          1.25390       -3.87730       -3.72630
H          1.38420       -2.29450       -2.94020
H          2.76830       -2.96180       -3.82440
H          3.41930       -5.85880       -1.48930
H          2.37810       -5.83440       -2.91470
H          3.96740       -5.06250       -2.98080
H          1.54570       -4.81740       -0.08600
H          0.61800       -3.45400       -0.72130
H          0.56850       -5.01580       -1.55280
H          4.96190        5.03950       -0.95020
H          4.89790        4.04960       -2.41560
H          6.24870        3.87420       -1.30030
H          7.21100       -3.22720        1.20630
H          7.84450       -2.66280       -0.33590
H          7.09980       -4.26570       -0.22170
Ir        -0.86640        0.41440       -0.46490
H          0.12620        1.11840       -1.47560
C         -2.30720        1.34800       -2.16900
C         -2.77600        2.12430       -1.11350
C         -2.89340        0.16380       -2.84590
C         -2.01870       -0.60250       -3.65120
C         -4.26120       -0.17380       -2.85490
C         -2.48160       -1.68190       -4.40070
H         -0.96670       -0.33070       -3.69200
C         -4.72280       -1.24940       -3.61370
H         -4.98010        0.42460       -2.31000
C         -3.83900       -2.01320       -4.38090
H         -1.78630       -2.25390       -5.00810
H         -5.78370       -1.48240       -3.61430
C         -2.24510        3.50640       -0.90470
C         -1.11930        4.01030       -1.59410
C         -2.91220        4.39950       -0.04570
C         -0.70080        5.32440       -1.43640
H         -0.54420        3.37240       -2.25550
C         -2.48800        5.72040        0.10730
H         -3.79070        4.08370        0.50360
C         -1.37640        6.21280       -0.58210
H          0.17100        5.67020       -1.98670
H         -3.04020        6.37740        0.77440
H         -4.20780       -2.84690       -4.97130
C         -0.90560        7.63640       -0.41500
H         -1.60290        8.22020        0.19330
H          0.07660        7.67200        0.07340
H         -0.79820        8.13600       -1.38510
C         -3.99590        1.74400       -0.30970
H         -4.87240        2.29560       -0.67540
H         -4.21630        0.68100       -0.37480
H         -3.86630        2.00170        0.74320
H         -1.54440        1.80730       -2.78660
H         -0.49260        1.62750        0.42290
H         -1.63430       -2.96470        1.88160
H          0.28560       -0.85530        2.97850
129
23_Intermediate_P
S         -2.11220       -1.87200        0.49390
C          0.15700       -2.16630        2.23340
C         -1.07470       -2.90920        1.70530
C         -1.92760       -3.48750        2.84470
H         -2.75470       -4.06730        2.42530
H         -2.37460       -2.67450        3.42700
C          0.96890       -3.02770        3.20740
H          1.79880       -2.42270        3.58800
H          1.40830       -3.85640        2.63760
C          0.10540       -3.58120        4.34680
H          0.71990       -4.21860        4.99220
H         -0.26210       -2.75680        4.97390
C         -1.08230       -4.36720        3.78100
H         -1.72230       -4.73820        4.58960
H         -0.71660       -5.24710        3.23470
O          1.06140       -1.88170        1.12350
P          1.06740       -0.48800        0.32200
O          1.85370        0.43760        1.41700
O          2.13770       -0.75730       -0.86840
C          2.53100        1.59600        0.98680
C          3.49270       -1.04380       -0.56760
C          3.66050        1.36770        0.17230
C          2.11980        2.87180        1.39340
C          4.22820       -0.01850        0.04900
C          4.03890       -2.28030       -0.94790
C          4.28520        2.46170       -0.45790
C          2.80300        3.93100        0.76800
C          1.07590        3.23700        2.47870
C          5.53270       -0.30350        0.51200
C          5.35320       -2.49530       -0.50830
C          3.32800       -3.29740       -1.87260
C          3.82290        3.76310       -0.16520
C          5.41560        2.28730       -1.44620
H          2.51390        4.94780        1.01470
C         -0.07740        4.04720        1.84260
C          0.46370        2.03990        3.23280
C          1.78210        4.11320        3.54790
C          6.08440       -1.56970        0.24020
C          6.34130        0.69500        1.30920
H          5.83790       -3.43380       -0.74650
C          2.98640       -2.59790       -3.21210
C          4.24240       -4.49740       -2.20270
C          2.03810       -3.87320       -1.24410
C          4.44580        4.97480       -0.81970
H          6.35970        2.68910       -1.05590
H          5.57920        1.24090       -1.70650
H          5.20150        2.83540       -2.37120
H         -0.60520        3.45640        1.08660
H         -0.80050        4.33900        2.61400
H          0.28160        4.96130        1.35890
H         -0.14930        1.41330        2.58260
H          1.22890        1.40990        3.69570
H         -0.18400        2.42550        4.02880
H          2.60520        3.56520        4.02080
H          2.18890        5.03920        3.13150
H          1.06440        4.38860        4.32950
C          7.47170       -1.93190        0.71970
H          6.71770        0.23310        2.22950
H          7.22060        1.04140        0.75080
H          5.75660        1.57180        1.58960
H          2.50720       -3.31170       -3.89340
H          2.30630       -1.75470       -3.06700
H          3.89450       -2.22550       -3.70010
H          4.50150       -5.07750       -1.30980
H          3.71280       -5.16780       -2.88810
H          5.17010       -4.18760       -2.69590
H          2.24380       -4.32560       -0.26760
H          1.26670       -3.11500       -1.10970
H          1.63260       -4.65350       -1.89950
H          4.00100        5.89790       -0.43680
H          4.30640        4.96390       -1.90840
H          5.52720        5.02340       -0.64140
H          7.53380       -1.93230        1.81570
H          8.22600       -1.21980        0.36240
H          7.75860       -2.92800        0.37040
Ir        -0.84790        0.18940       -0.60270
H          0.03600        1.28320       -1.32440
C         -2.19640        0.83580       -2.46170
C         -3.06560        1.43110       -1.55220
C         -2.25690       -0.48760       -3.13330
C         -1.03460       -1.00670       -3.61760
C         -3.43430       -1.21950       -3.39210
C         -0.98060       -2.23830       -4.27260
H         -0.12390       -0.42630       -3.48930
C         -3.37720       -2.43900       -4.06400
H         -4.40110       -0.81960       -3.11390
C         -2.15200       -2.96300       -4.49140
H         -0.02650       -2.61680       -4.62680
H         -4.29810       -2.97760       -4.26840
C         -2.97620        2.89540       -1.27880
C         -1.89190        3.69330       -1.70690
C         -4.03170        3.55840       -0.62510
C         -1.87730        5.06620       -1.50160
H         -1.03290        3.24310       -2.19100
C         -4.01250        4.93910       -0.42350
H         -4.89920        3.00800       -0.28130
C         -2.93960        5.72320       -0.85680
H         -1.02190        5.64250       -1.84580
H         -4.85420        5.41080        0.07730
H         -2.11800       -3.91500       -5.01290
C         -2.91150        7.21640       -0.64320
H         -3.82150        7.56720       -0.14770
H         -2.05450        7.51180       -0.02530
H         -2.81690        7.75100       -1.59640
C         -4.27170        0.71440       -0.99840
H         -5.16610        1.01740       -1.55990
H         -4.18360       -0.36590       -1.07380
H         -4.44630        0.96240        0.04970
H         -1.49840        1.50190       -2.95630
H         -0.94550        1.27080        0.50220
C         -3.75080       -1.73690        1.25120
C         -4.73780       -2.63490        0.77970
C         -4.04340       -0.76290        2.23260
C         -6.03100       -2.52960        1.30980
C         -5.35230       -0.70290        2.72980
C         -6.33920       -1.57350        2.27360
H         -6.79960       -3.21250        0.95930
H         -5.59300        0.03980        3.48530
H         -7.34790       -1.50780        2.67150
C         -3.01850        0.20650        2.76720
H         -2.23310       -0.30320        3.33790
H         -2.52230        0.75420        1.96070
H         -3.48990        0.93150        3.43630
C         -4.45980       -3.70170       -0.25650
H         -4.11850       -3.27390       -1.20510
H         -3.68070       -4.39790        0.07420
H         -5.36600       -4.28170       -0.45160
H         -0.71650       -3.72510        1.06910
H         -0.13560       -1.22860        2.71610
